# Supplementary material
Source: PubMed Central journal article supplement (PMC6331952)

# Supplementary Materials

## Cladribine Analogues via *O*<sup>6</sup>-(Benzotriazolyl) Derivatives of Guanine Nucleosides

Sakilam Satishkumar, Prasanna K. Vuram, Siva Subrahmanyam Relangi, Venkateshwarlu Gurrum, Hong Zhou, Robert J. Kreitman, Michelle M. Martínez Montemayor, Lijia Yang, Muralidharan Kaliyaperumal, Somesh Sharma, Narender Pottabathini and Mahesh K. Lakshman \*

### Table of Contents

| Information                                                                       | Page |
|-----------------------------------------------------------------------------------|------|
| 500 MHz <sup>1</sup> H-NMR spectrum of compound <b>4a</b> in CDCl <sub>3</sub>    | S-3  |
| 125 MHz <sup>13</sup> C-NMR spectrum of compound <b>4a</b> in CDCl <sub>3</sub>   | S-4  |
| 500 MHz <sup>1</sup> H-NMR spectrum of compound <b>5a</b> in CDCl <sub>3</sub>    | S-5  |
| 125 MHz <sup>13</sup> C-NMR spectrum of compound <b>5a</b> in CDCl <sub>3</sub>   | S-6  |
| 500 MHz <sup>1</sup> H-NMR spectrum of compound <b>6a</b> in CDCl <sub>3</sub>    | S-7  |
| 125 MHz <sup>13</sup> C-NMR spectrum of compound <b>6a</b> in CDCl <sub>3</sub>   | S-8  |
| 500 MHz <sup>1</sup> H-NMR spectrum of compound <b>7a</b> in CDCl <sub>3</sub>    | S-9  |
| 125 MHz <sup>13</sup> C-NMR spectrum of compound <b>7a</b> in CDCl <sub>3</sub>   | S-10 |
| 500 MHz <sup>1</sup> H-NMR spectrum of compound <b>8a</b> in CDCl <sub>3</sub>    | S-11 |
| 125 MHz <sup>13</sup> C-NMR spectrum of compound <b>8a</b> in CDCl <sub>3</sub>   | S-12 |
| 500 MHz <sup>1</sup> H-NMR spectrum of compound <b>9a</b> in CDCl <sub>3</sub>    | S-13 |
| 125 MHz <sup>13</sup> C-NMR spectrum of compound <b>9a</b> in CDCl <sub>3</sub>   | S-14 |
| 500 MHz <sup>1</sup> H-NMR spectrum of compound <b>10a</b> in CDCl <sub>3</sub>   | S-15 |
| 125 MHz <sup>13</sup> C-NMR spectrum of compound <b>10a</b> in CDCl <sub>3</sub>  | S-16 |
| 500 MHz <sup>1</sup> H-NMR spectrum of compound <b>11a</b> in CDCl <sub>3</sub>   | S-17 |
| 125 MHz <sup>13</sup> C-NMR spectrum of compound <b>11a</b> in CDCl <sub>3</sub>  | S-18 |
| 400 MHz <sup>1</sup> H-NMR spectrum of compound <b>4b</b> in CDCl <sub>3</sub>    | S-19 |
| 100 MHz <sup>13</sup> C-NMR spectrum of compound <b>4b</b> in CDCl <sub>3</sub>   | S-20 |
| 400 MHz <sup>1</sup> H-NMR spectrum of compound <b>5b</b> in CDCl <sub>3</sub>    | S-21 |
| 100 MHz <sup>13</sup> C-NMR spectrum of compound <b>5b</b> in CDCl <sub>3</sub>   | S-22 |
| 400 MHz <sup>1</sup> H-NMR spectrum of compound <b>6b</b> in CDCl <sub>3</sub>    | S-23 |
| 100 MHz <sup>13</sup> C-NMR spectrum of compound <b>6b</b> in CDCl <sub>3</sub>   | S-24 |
| 400 MHz <sup>1</sup> H-NMR spectrum of compound <b>7b</b> in CDCl <sub>3</sub>    | S-25 |
| 100 MHz <sup>13</sup> C-NMR spectrum of compound <b>7b</b> in CDCl <sub>3</sub>   | S-26 |
| 400 MHz <sup>1</sup> H-NMR spectrum of compound <b>8b</b> in CDCl <sub>3</sub>    | S-27 |
| 100 MHz <sup>13</sup> C-NMR spectrum of compound <b>8b</b> in CDCl <sub>3</sub>   | S-28 |
| 400 MHz <sup>1</sup> H-NMR spectrum of compound <b>9b</b> in CDCl <sub>3</sub>    | S-29 |
| 100 MHz <sup>13</sup> C-NMR spectrum of compound <b>9b</b> in CDCl <sub>3</sub>   | S-30 |
| 400 MHz <sup>1</sup> H-NMR spectrum of compound <b>10b</b> in CDCl <sub>3</sub>   | S-31 |
| 100 MHz <sup>13</sup> C-NMR spectrum of compound <b>10b</b> in CDCl <sub>3</sub>  | S-32 |
| 400 MHz <sup>1</sup> H-NMR spectrum of compound <b>11b</b> in CDCl <sub>3</sub>   | S-33 |
| 100 MHz <sup>13</sup> C-NMR spectrum of compound <b>11b</b> in CDCl <sub>3</sub>  | S-34 |
| 500 MHz <sup>1</sup> H-NMR spectrum of compound <b>12a</b> in CD <sub>3</sub> OD  | S-35 |
| 125 MHz <sup>13</sup> C-NMR spectrum of compound <b>12a</b> in CD <sub>3</sub> OD | S-36 |
| 500 MHz <sup>1</sup> H-NMR spectrum of compound <b>13a</b> in CD <sub>3</sub> OD  | S-37 |

Cont.

| Information                                                                                | Page |
|--------------------------------------------------------------------------------------------|------|
| 125 MHz <sup>13</sup> C-NMR spectrum of compound <b>13a</b> in CD <sub>3</sub> OD          | S-38 |
| 500 MHz <sup>1</sup> H-NMR spectrum of compound <b>14a</b> in CD <sub>3</sub> OD           | S-39 |
| 125 MHz <sup>13</sup> C-NMR spectrum of compound <b>14a</b> in CD <sub>3</sub> OD          | S-40 |
| 500 MHz <sup>1</sup> H-NMR spectrum of compound <b>15a</b> in CD <sub>3</sub> OD           | S-41 |
| 125 MHz <sup>13</sup> C-NMR spectrum of compound <b>15a</b> in CD <sub>3</sub> OD          | S-42 |
| 500 MHz <sup>1</sup> H-NMR spectrum of compound <b>16a</b> in CD <sub>3</sub> OD           | S-43 |
| 125 MHz <sup>13</sup> C-NMR spectrum of compound <b>16a</b> in CD <sub>3</sub> OD          | S-44 |
| 500 MHz <sup>1</sup> H-NMR spectrum of compound <b>17a</b> in CD <sub>3</sub> OD           | S-45 |
| 125 MHz <sup>13</sup> C-NMR spectrum of compound <b>17a</b> in CD <sub>3</sub> OD          | S-46 |
| 500 MHz <sup>1</sup> H-NMR spectrum of compound <b>18a</b> in CD <sub>3</sub> OD           | S-47 |
| 125 MHz <sup>13</sup> C-NMR spectrum of compound <b>18a</b> in CD <sub>3</sub> OD          | S-48 |
| 400 MHz <sup>1</sup> H-NMR spectrum of compound <b>12b</b> in CD <sub>3</sub> OD           | S-49 |
| 100 MHz <sup>13</sup> C-NMR spectrum of compound <b>12b</b> in DMSO- <i>d</i> <sub>6</sub> | S-50 |
| 400 MHz <sup>1</sup> H-NMR spectrum of compound <b>13b</b> in CD <sub>3</sub> OD           | S-51 |
| 100 MHz <sup>13</sup> C-NMR spectrum of compound <b>13b</b> in DMSO- <i>d</i> <sub>6</sub> | S-52 |
| 400 MHz <sup>1</sup> H-NMR spectrum of compound <b>14b</b> in CD <sub>3</sub> OD           | S-53 |
| 100 MHz <sup>13</sup> C-NMR spectrum of compound <b>14b</b> in DMSO- <i>d</i> <sub>6</sub> | S-54 |
| 400 MHz <sup>1</sup> H-NMR spectrum of compound <b>15b</b> in CD <sub>3</sub> OD           | S-55 |
| 100 MHz <sup>13</sup> C-NMR spectrum of compound <b>15b</b> in DMSO- <i>d</i> <sub>6</sub> | S-56 |
| 400 MHz <sup>1</sup> H-NMR spectrum of compound <b>16b</b> in CD <sub>3</sub> OD           | S-57 |
| 100 MHz <sup>13</sup> C-NMR spectrum of compound <b>16b</b> in DMSO- <i>d</i> <sub>6</sub> | S-58 |
| 400 MHz <sup>1</sup> H-NMR spectrum of compound <b>17b</b> in CD <sub>3</sub> OD           | S-59 |
| 100 MHz <sup>13</sup> C-NMR spectrum of compound <b>17b</b> in DMSO- <i>d</i> <sub>6</sub> | S-60 |
| 400 MHz <sup>1</sup> H-NMR spectrum of compound <b>18b</b> in CD <sub>3</sub> OD           | S-61 |
| 100 MHz <sup>13</sup> C-NMR spectrum of compound <b>18b</b> in CD <sub>3</sub> OD          | S-62 |
| 500 MHz <sup>1</sup> H-NMR spectrum of compound <b>19a</b> in CDCl <sub>3</sub>            | S-63 |
| 125 MHz <sup>13</sup> C-NMR spectrum of compound <b>19a</b> in CDCl <sub>3</sub>           | S-64 |
| 500 MHz <sup>1</sup> H-NMR spectrum of compound <b>20a</b> in CDCl <sub>3</sub>            | S-65 |
| 125 MHz <sup>13</sup> C-NMR spectrum of compound <b>20a</b> in CDCl <sub>3</sub>           | S-66 |
| 500 MHz <sup>1</sup> H-NMR spectrum of compound <b>21a</b> in CD <sub>3</sub> OD           | S-67 |
| 125 MHz <sup>13</sup> C-NMR spectrum of compound <b>21a</b> in CD <sub>3</sub> OD          | S-68 |
| 400 MHz <sup>1</sup> H-NMR spectrum of compound <b>19b</b> in CDCl <sub>3</sub>            | S-69 |
| 100 MHz <sup>13</sup> C-NMR spectrum of compound <b>19b</b> in CDCl <sub>3</sub>           | S-70 |
| 400 MHz <sup>1</sup> H-NMR spectrum of compound <b>20b</b> in CDCl <sub>3</sub>            | S-71 |
| 100 MHz <sup>13</sup> C-NMR spectrum of compound <b>20b</b> in CDCl <sub>3</sub>           | S-72 |
| 400 MHz <sup>1</sup> H-NMR spectrum of compound <b>21b</b> in CD <sub>3</sub> OD           | S-73 |
| 100 MHz <sup>13</sup> C-NMR spectrum of compound <b>21b</b> in DMSO- <i>d</i> <sub>6</sub> | S-74 |

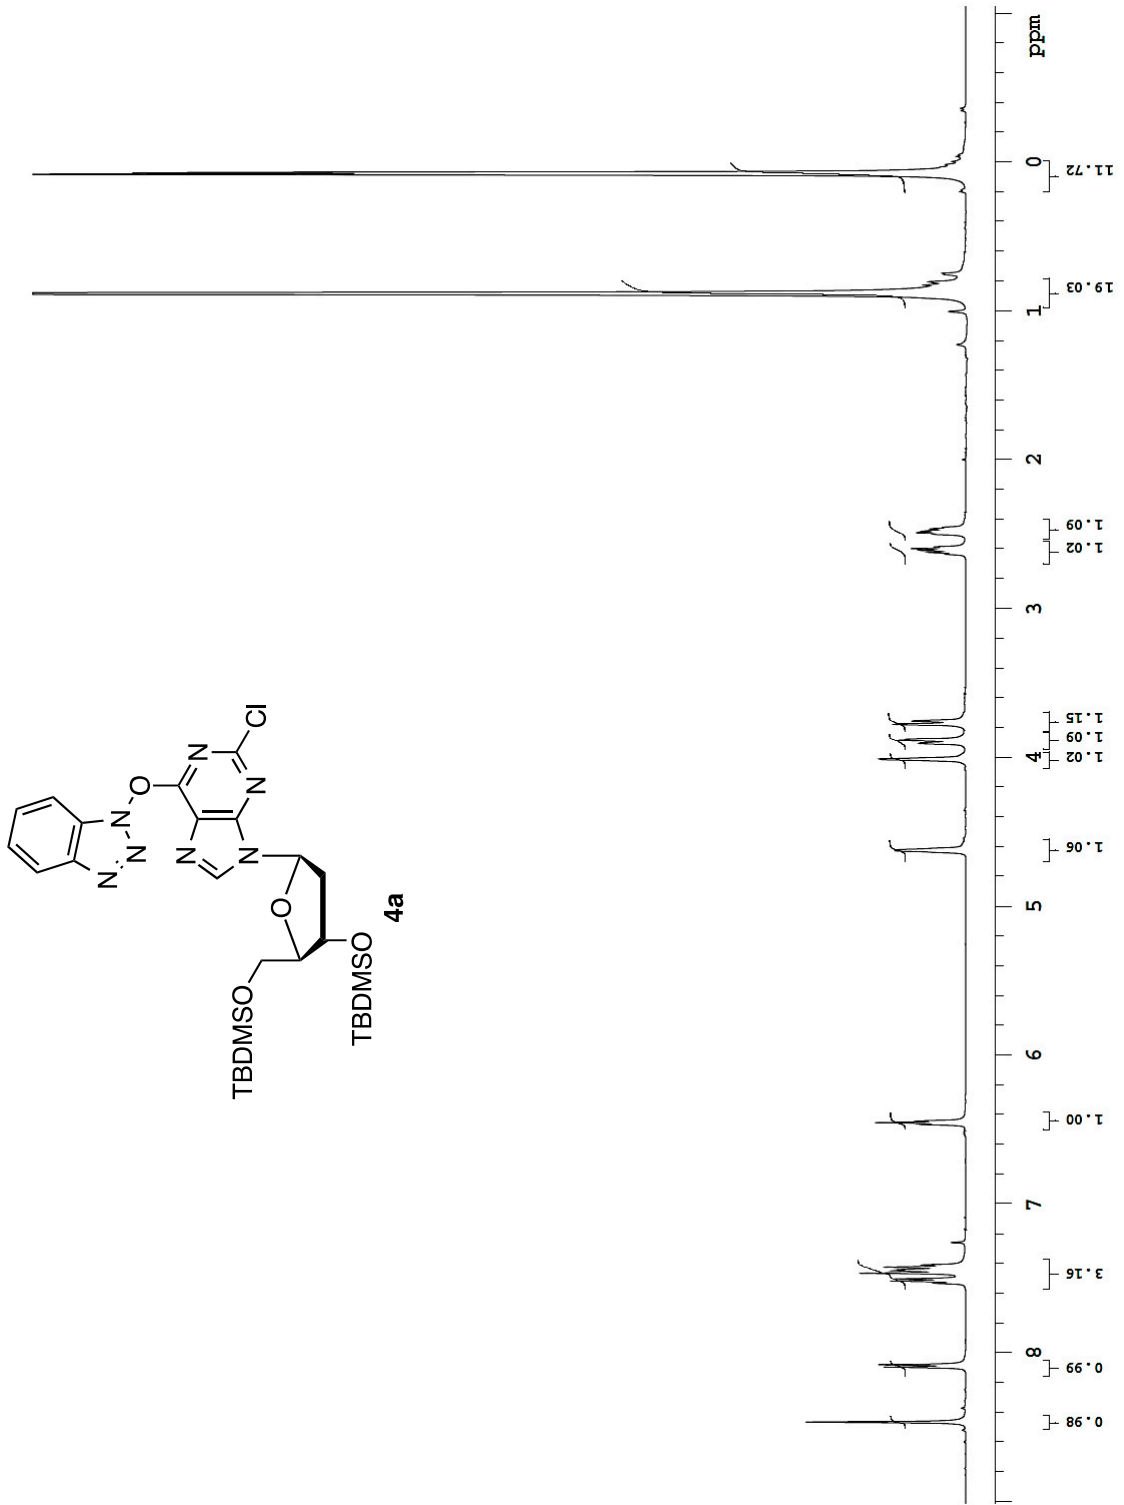

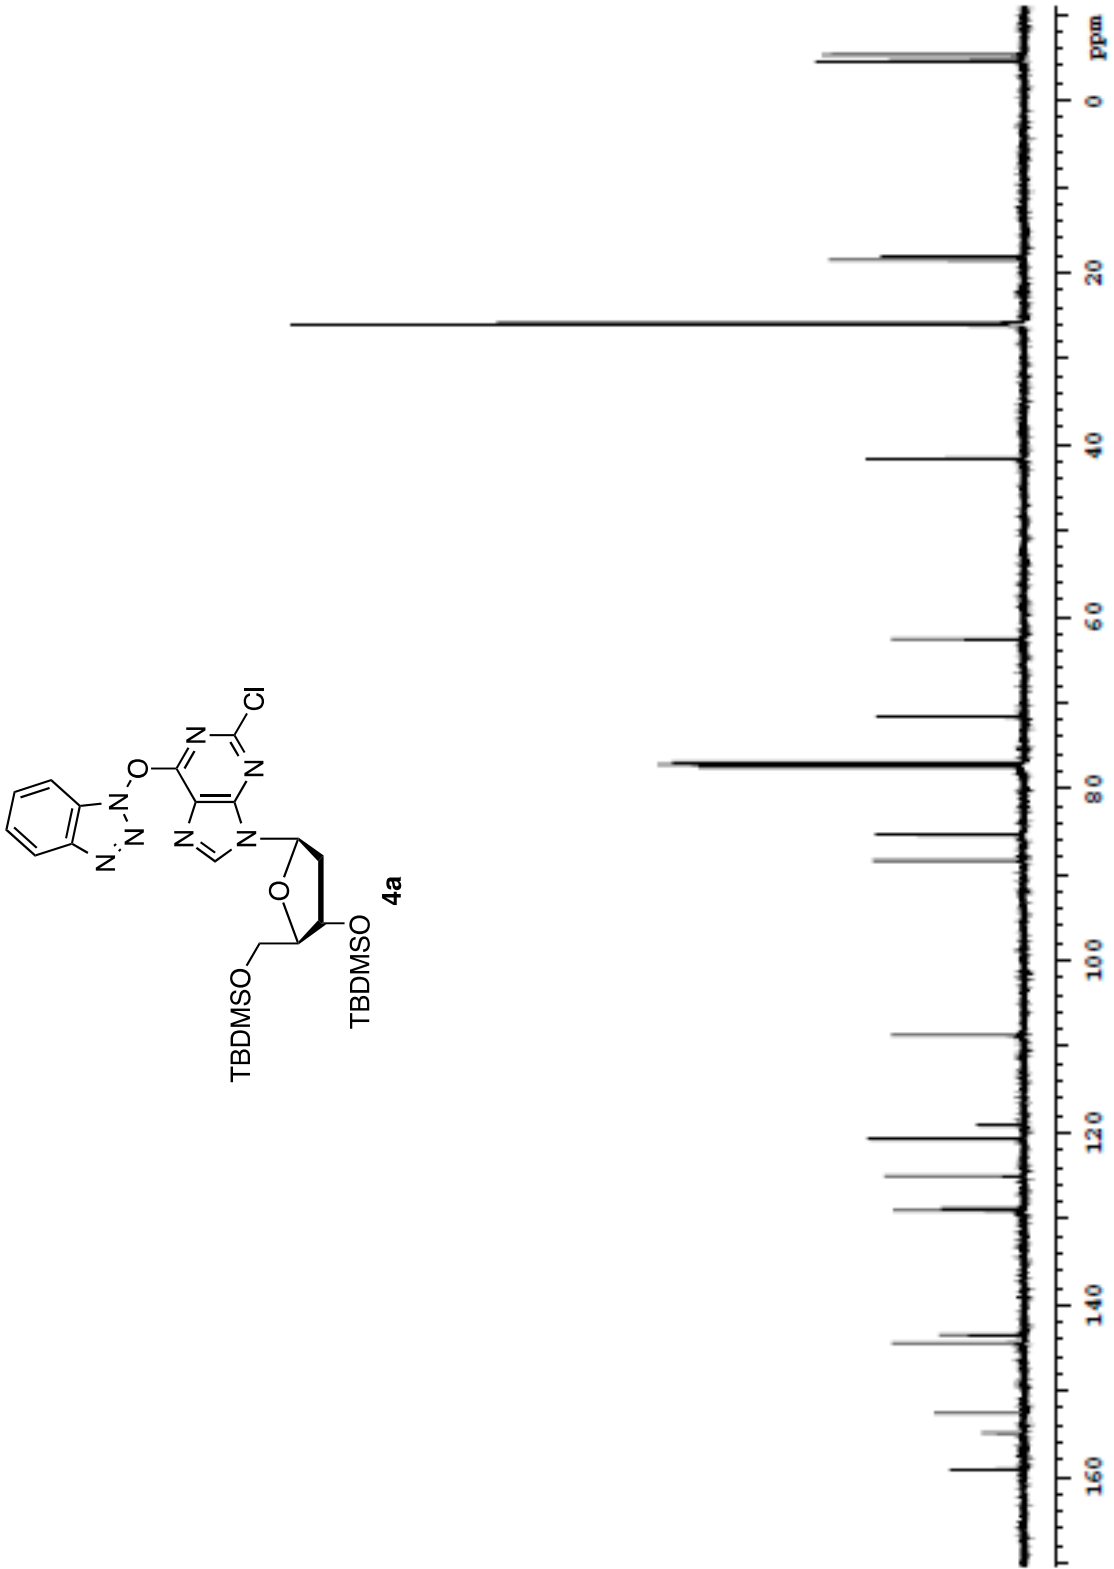

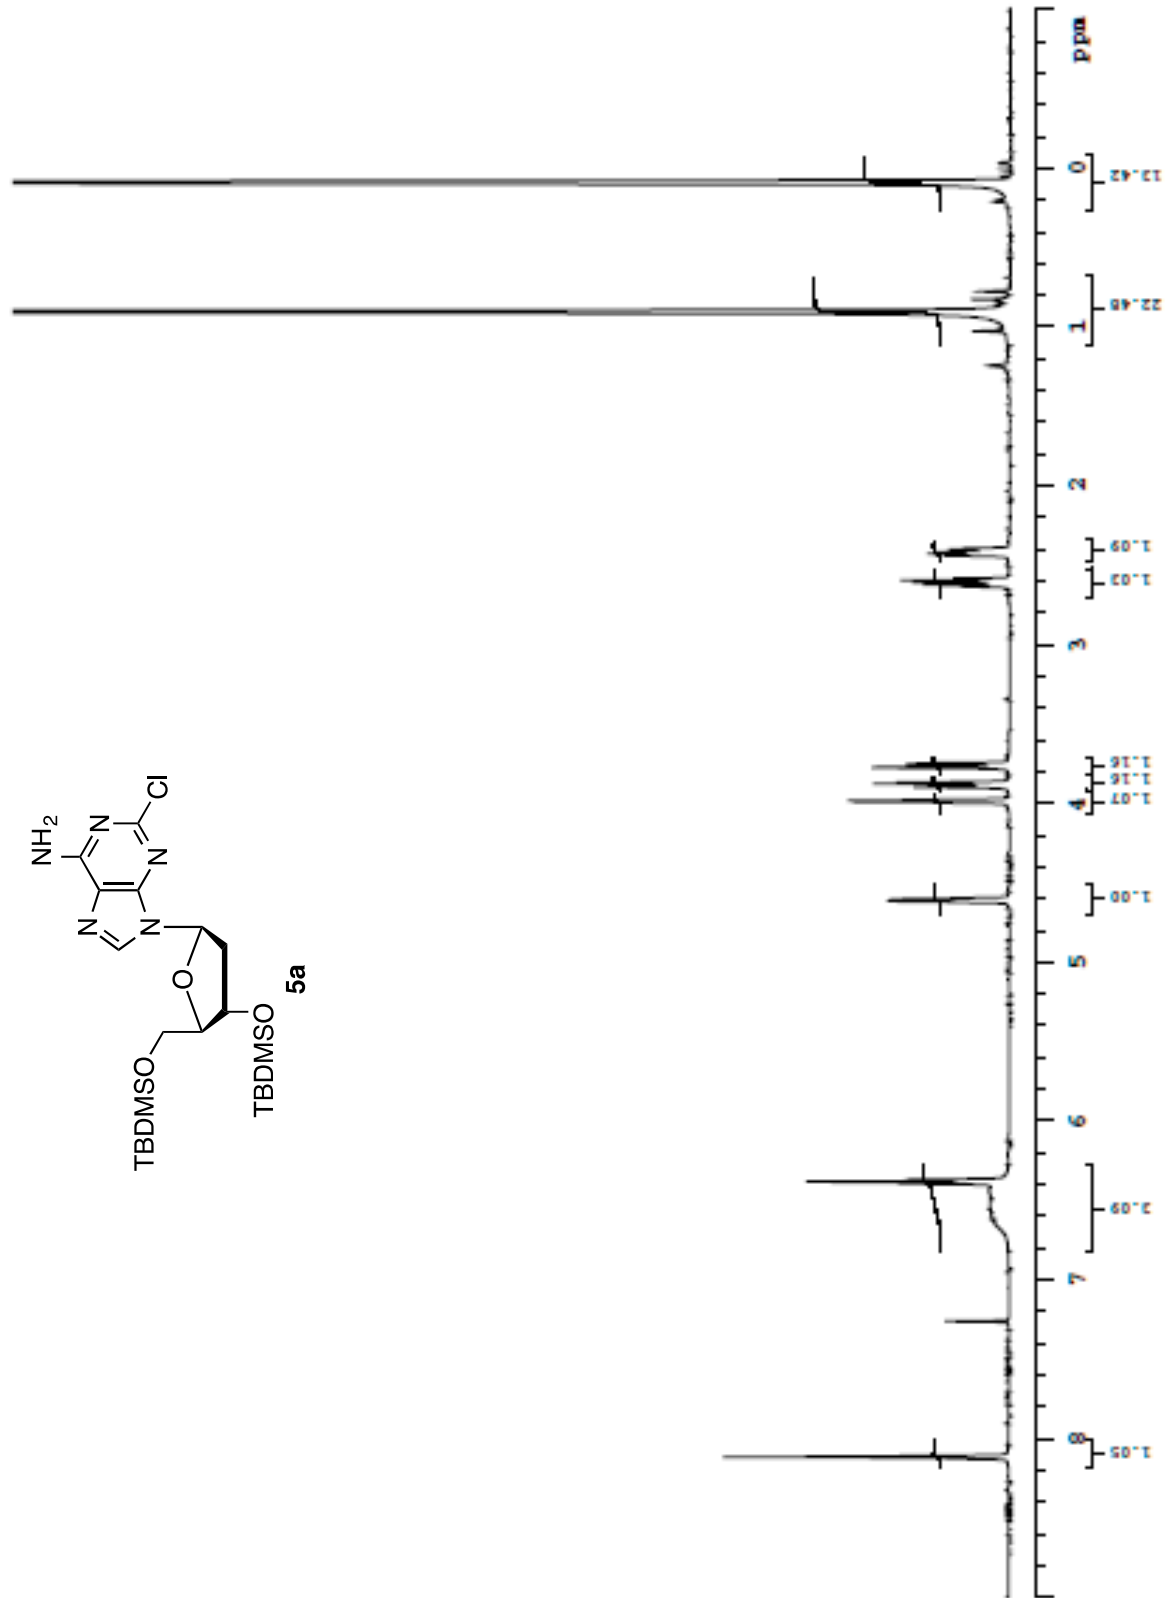

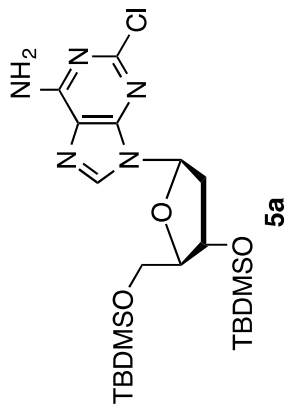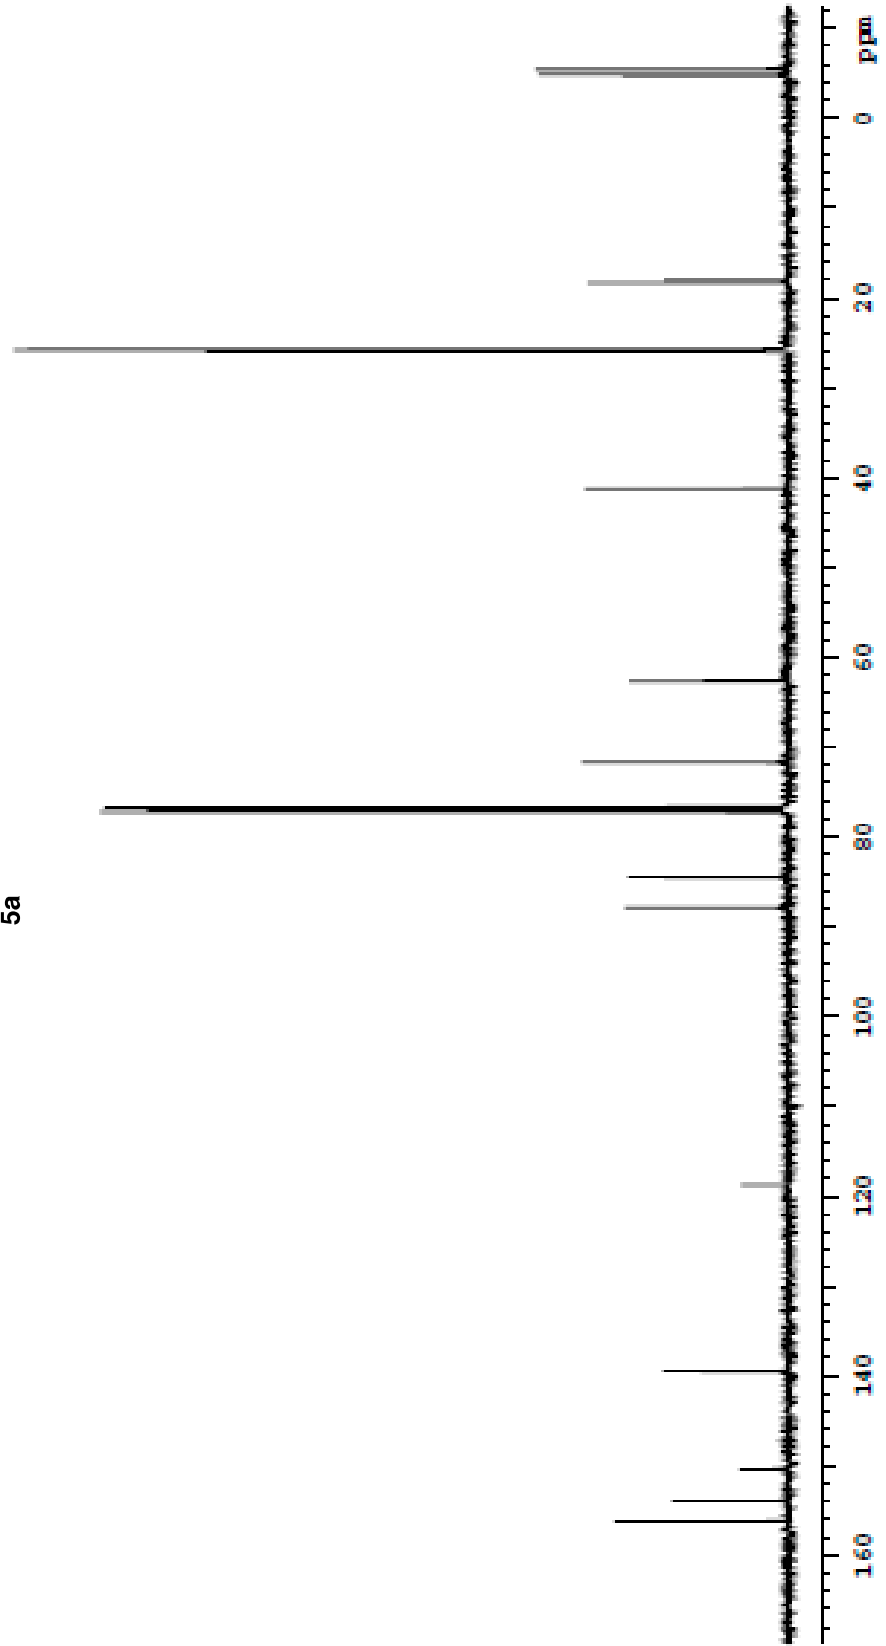

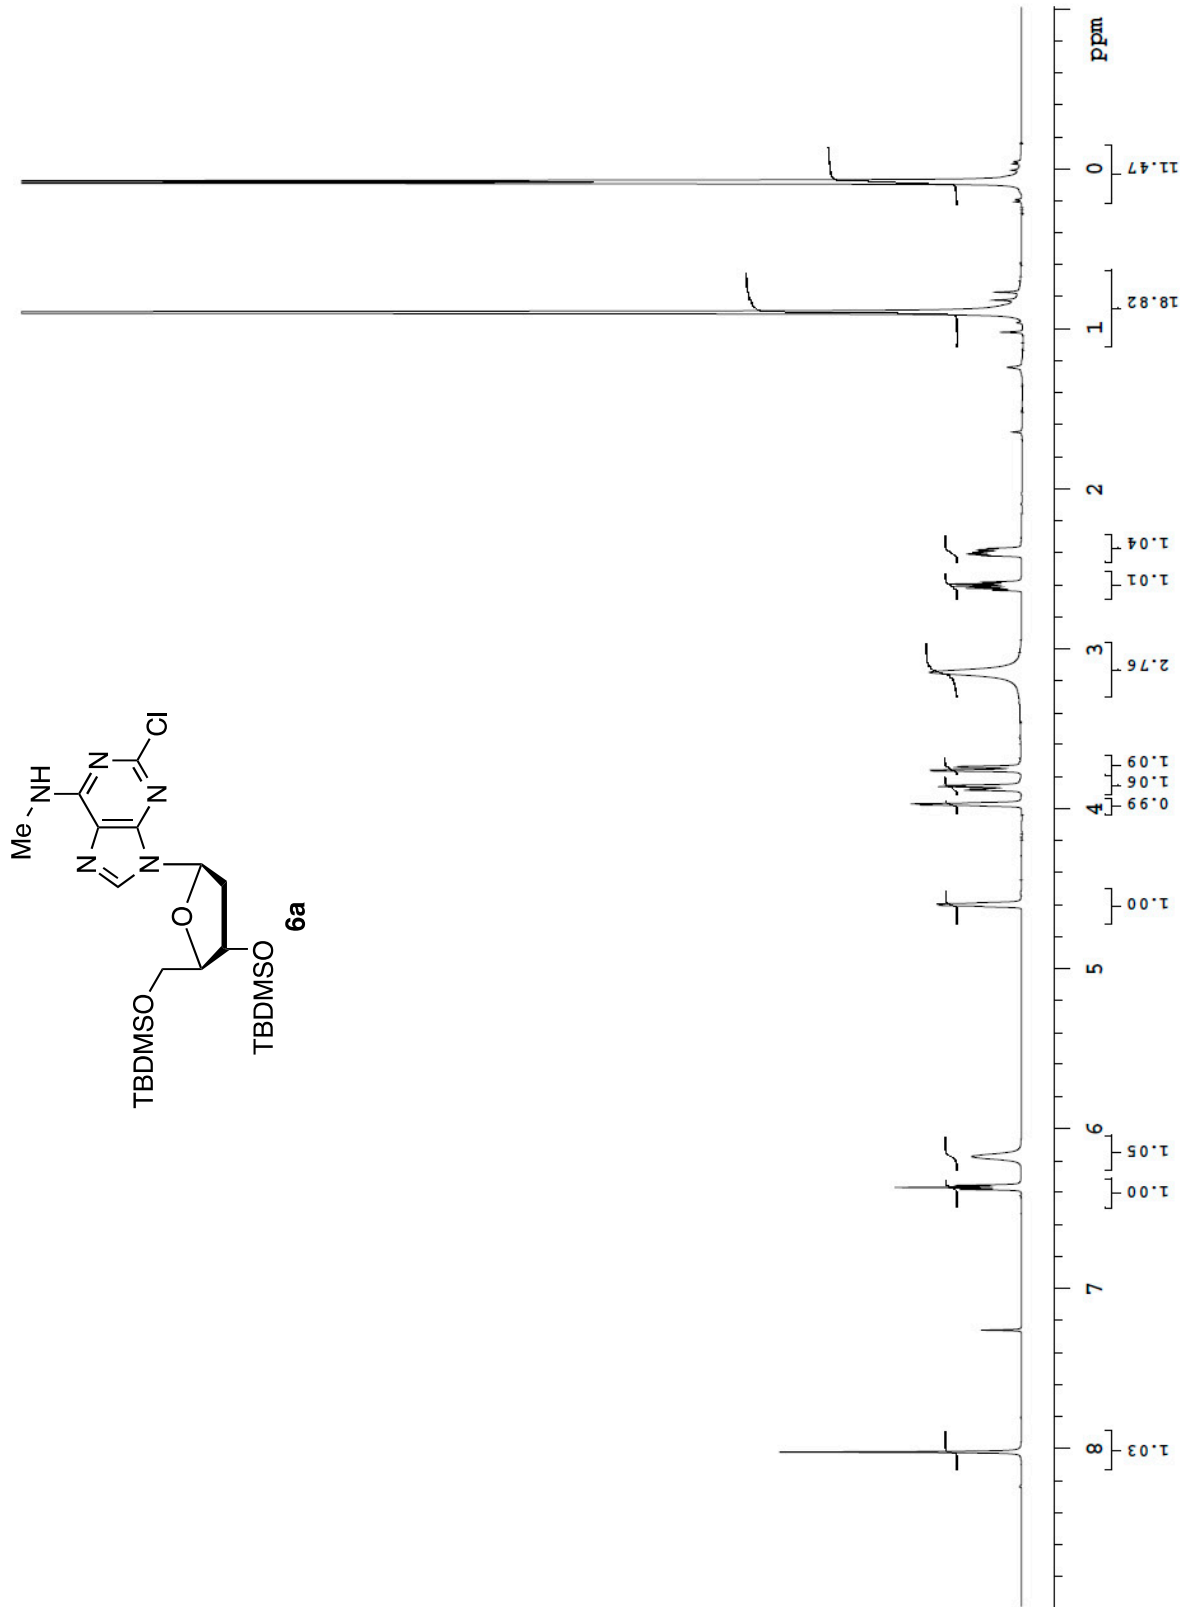

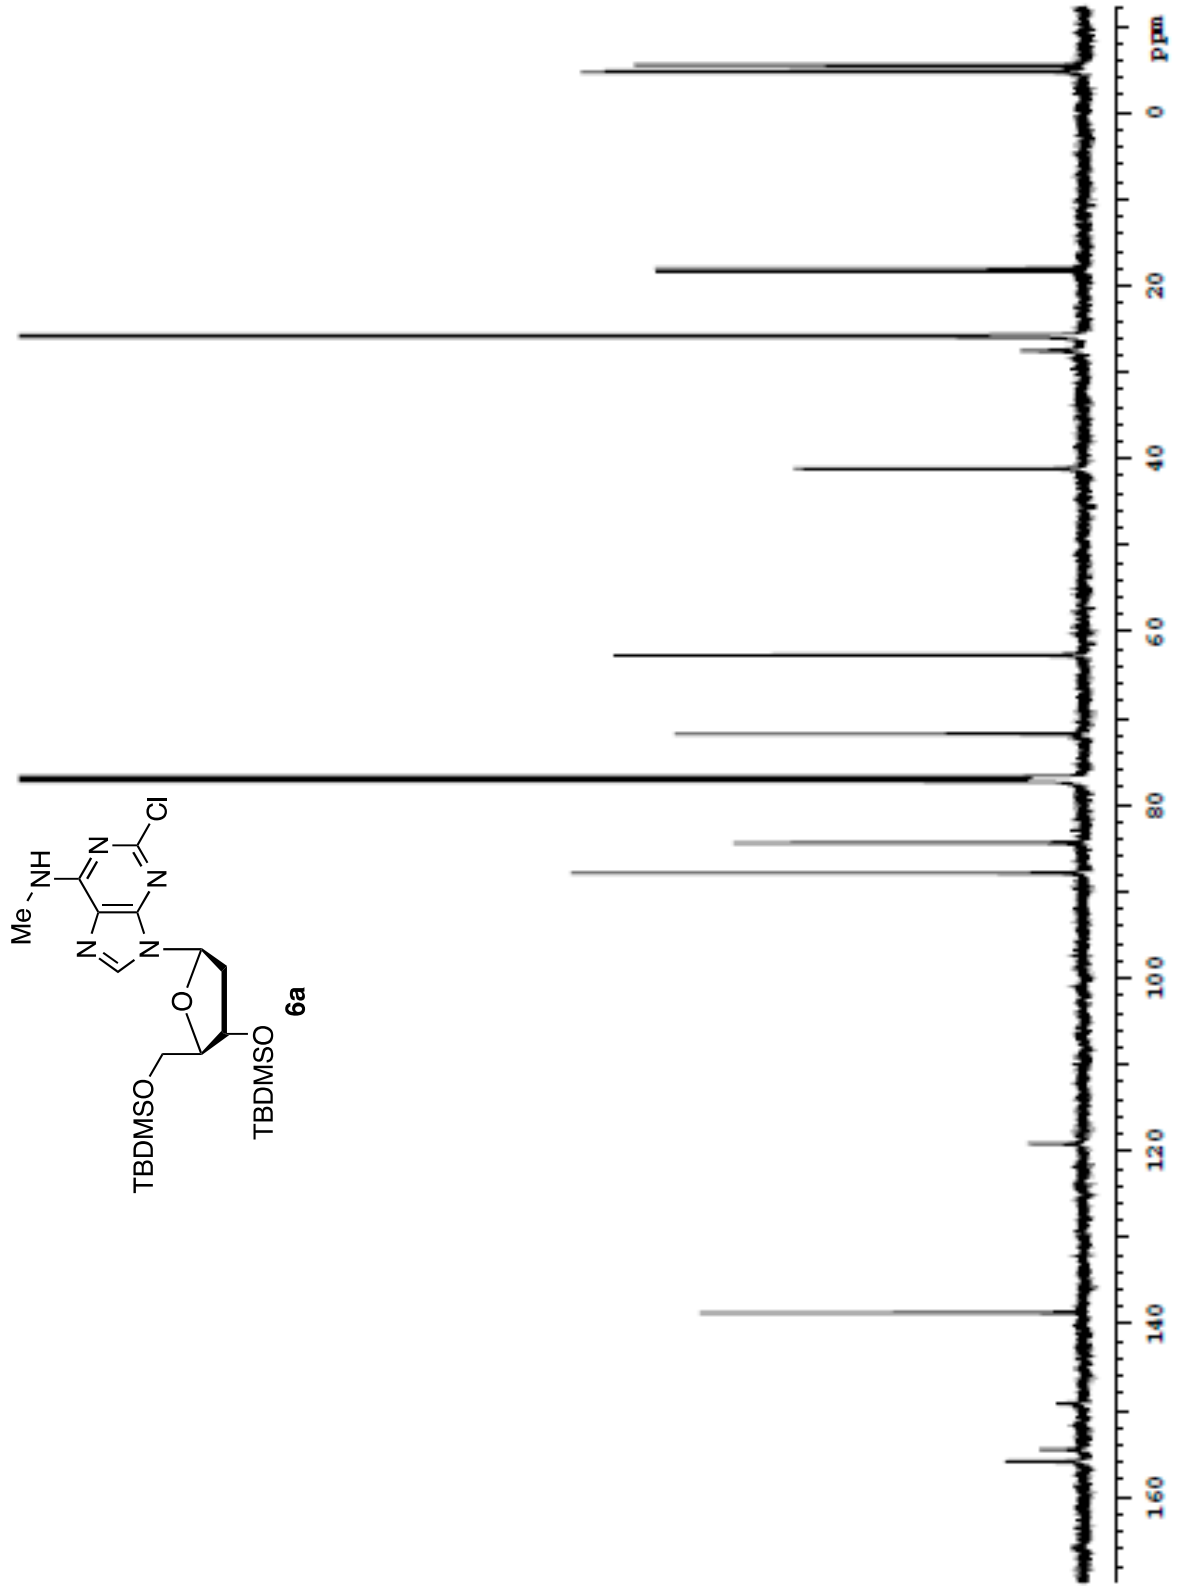



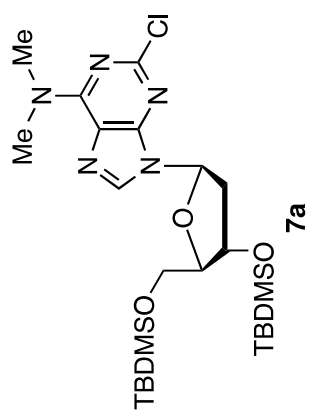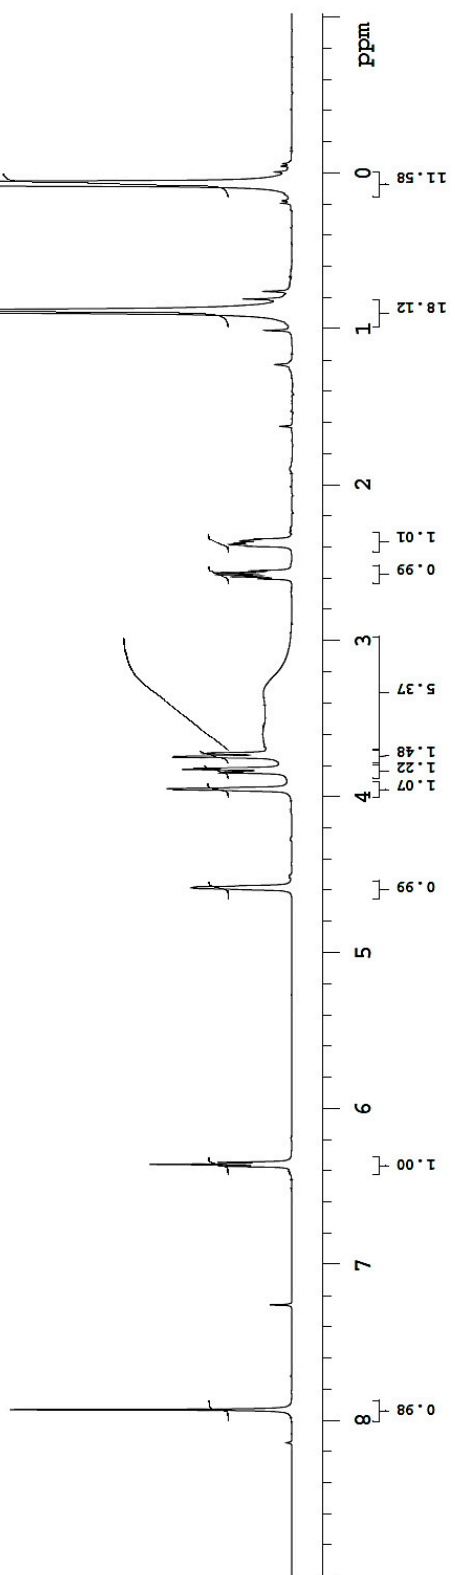

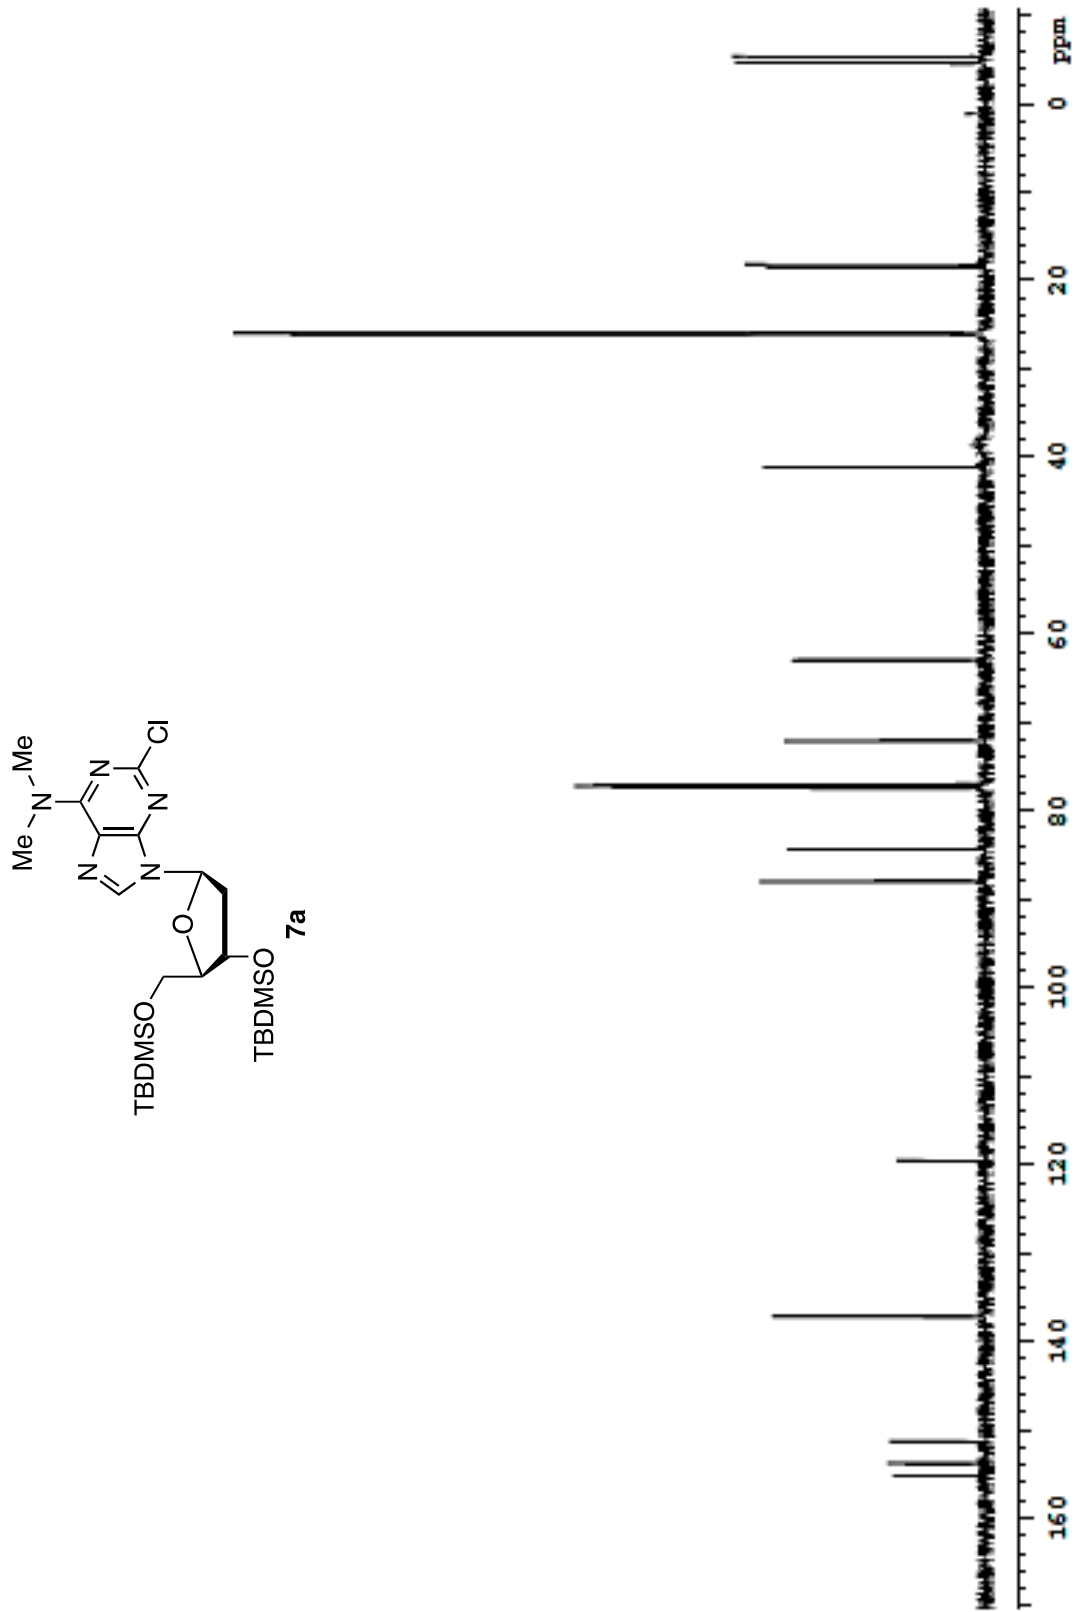

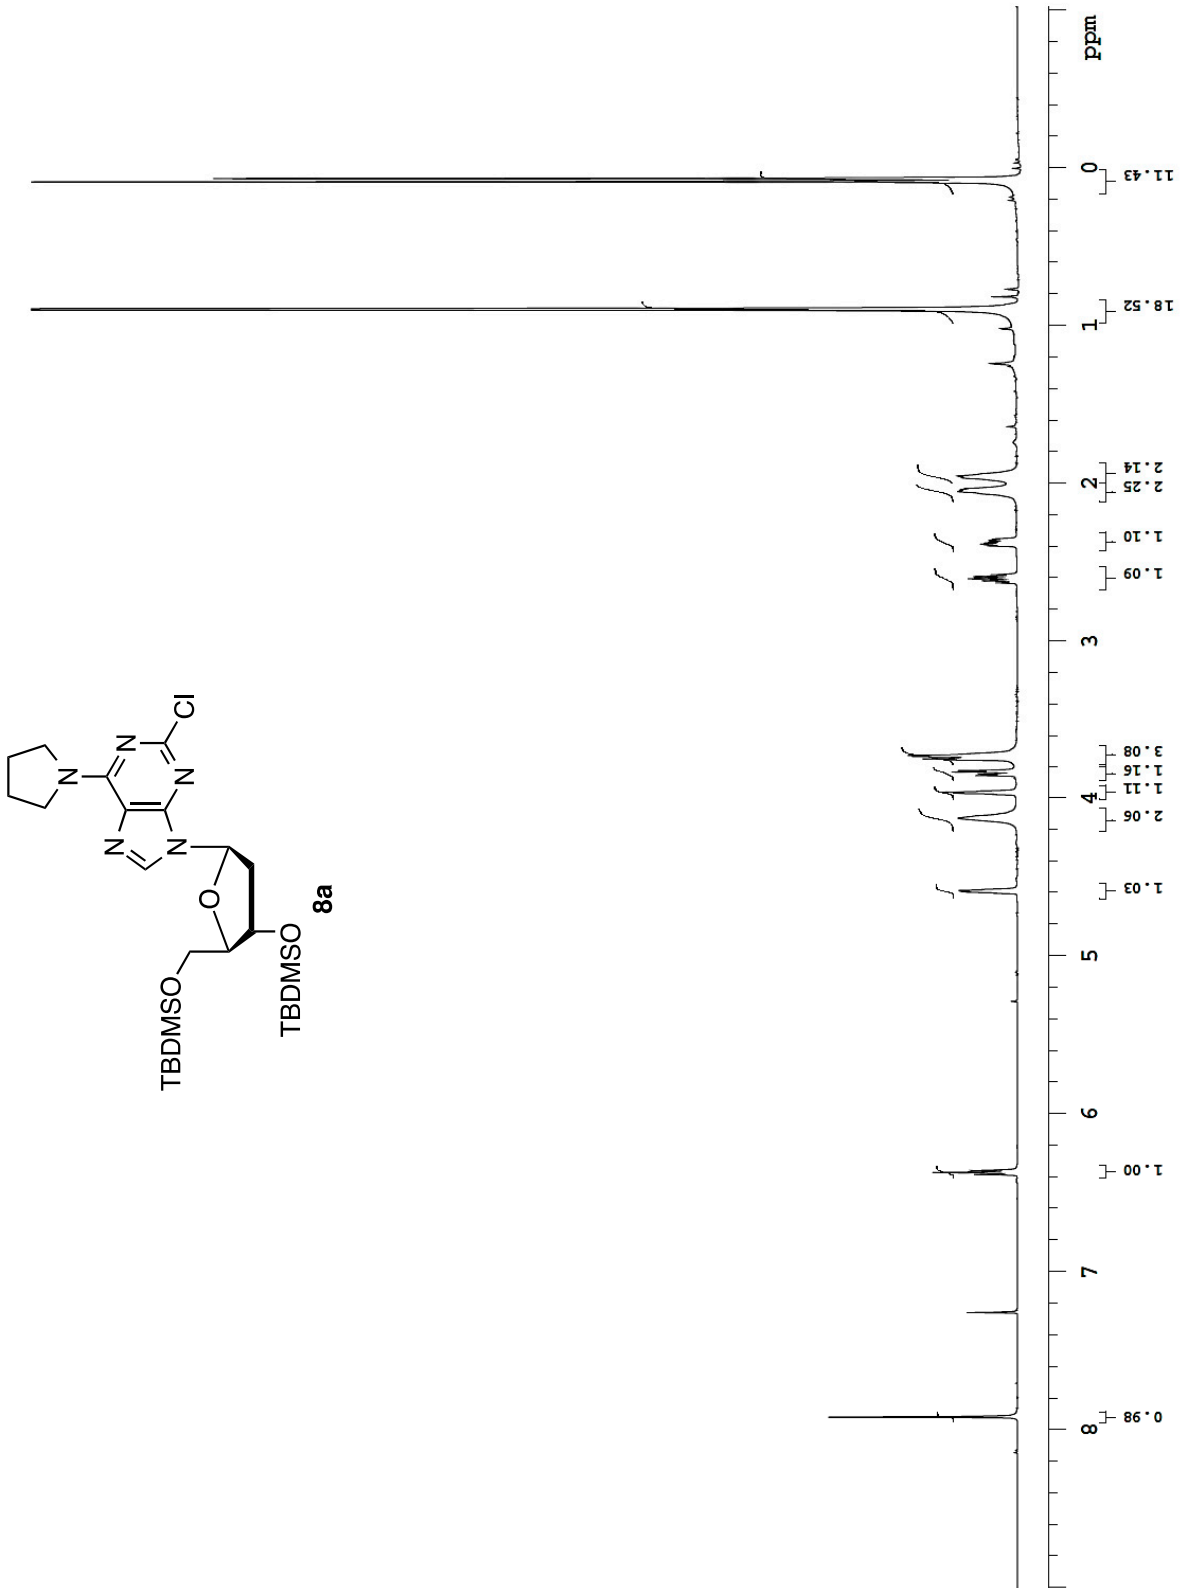

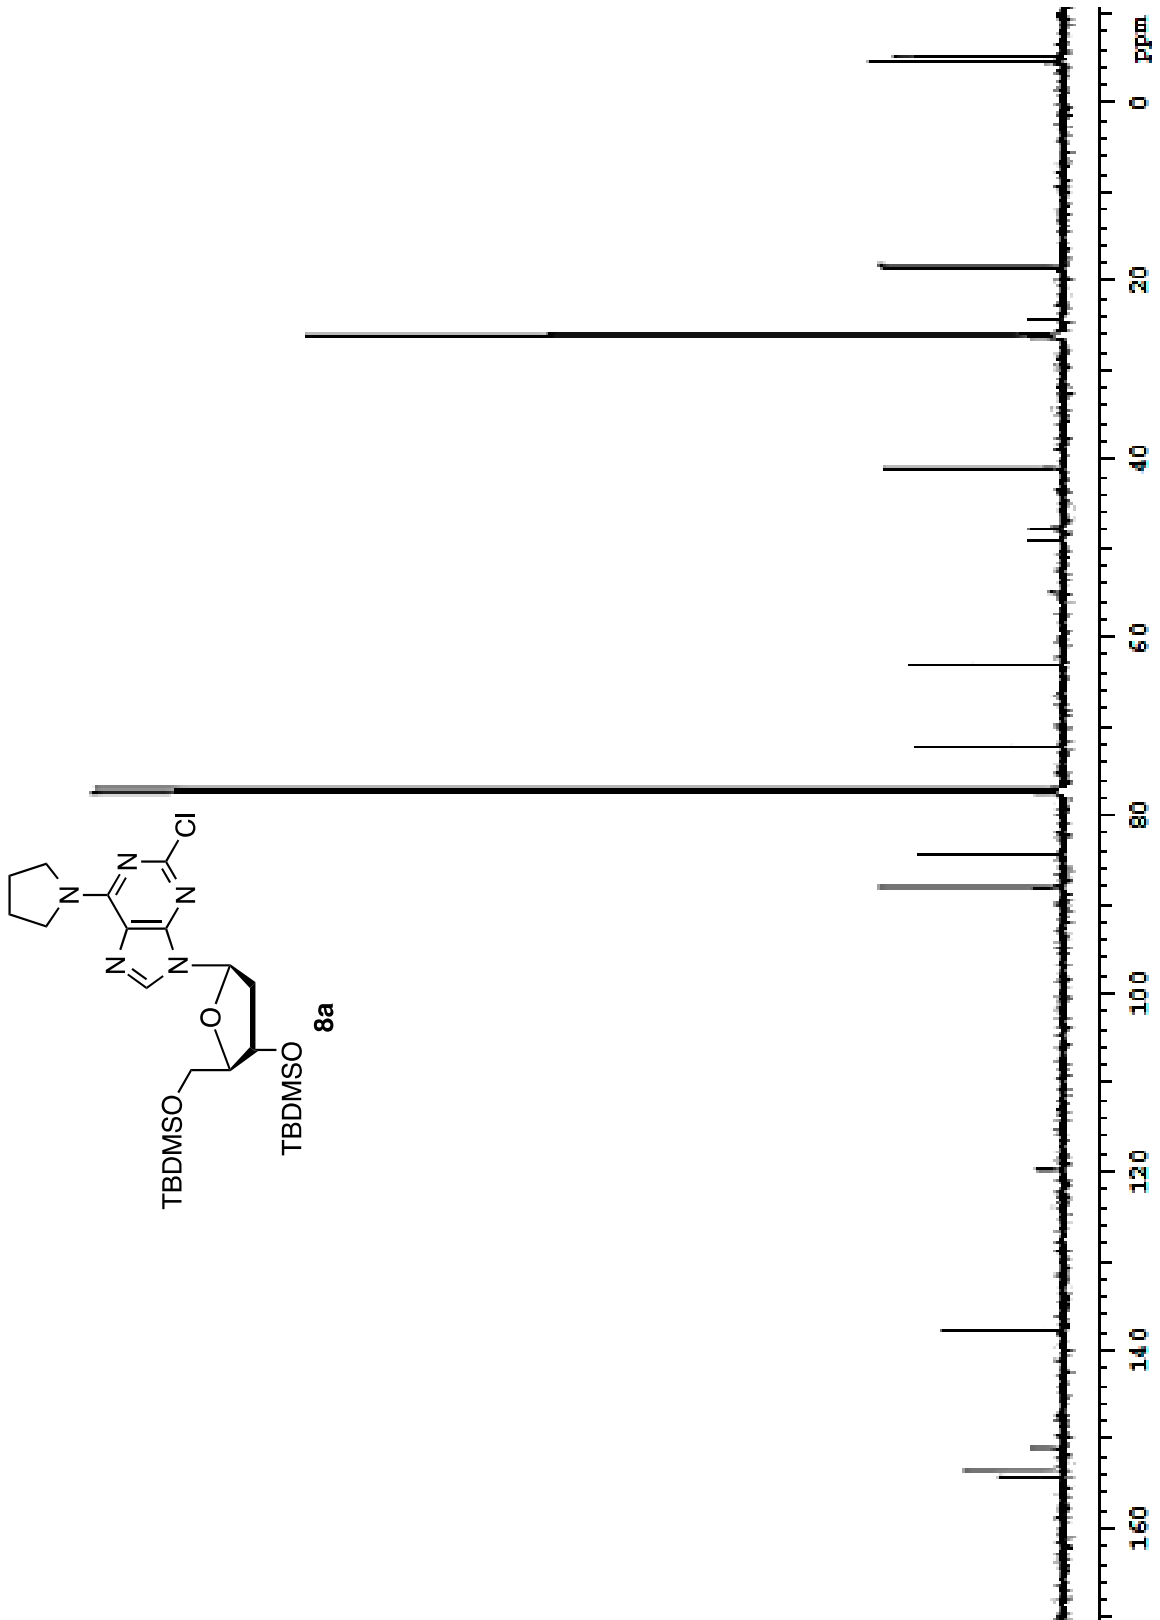

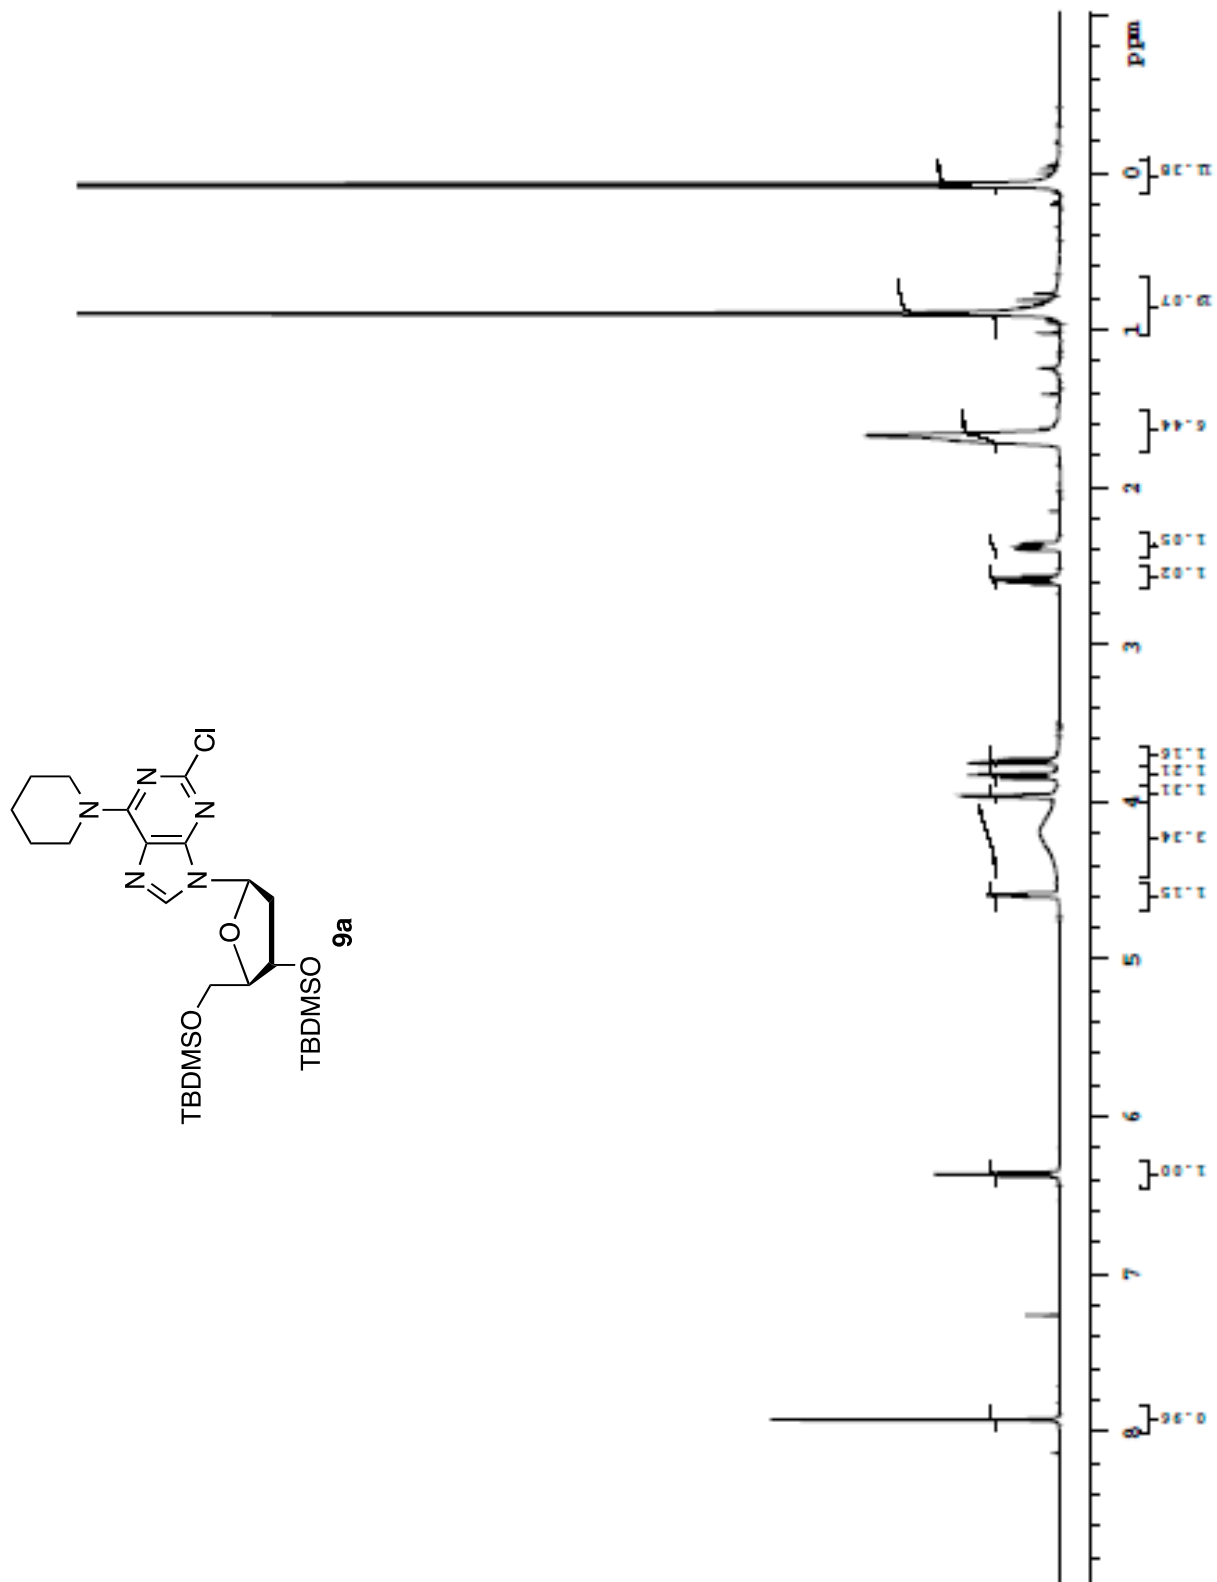

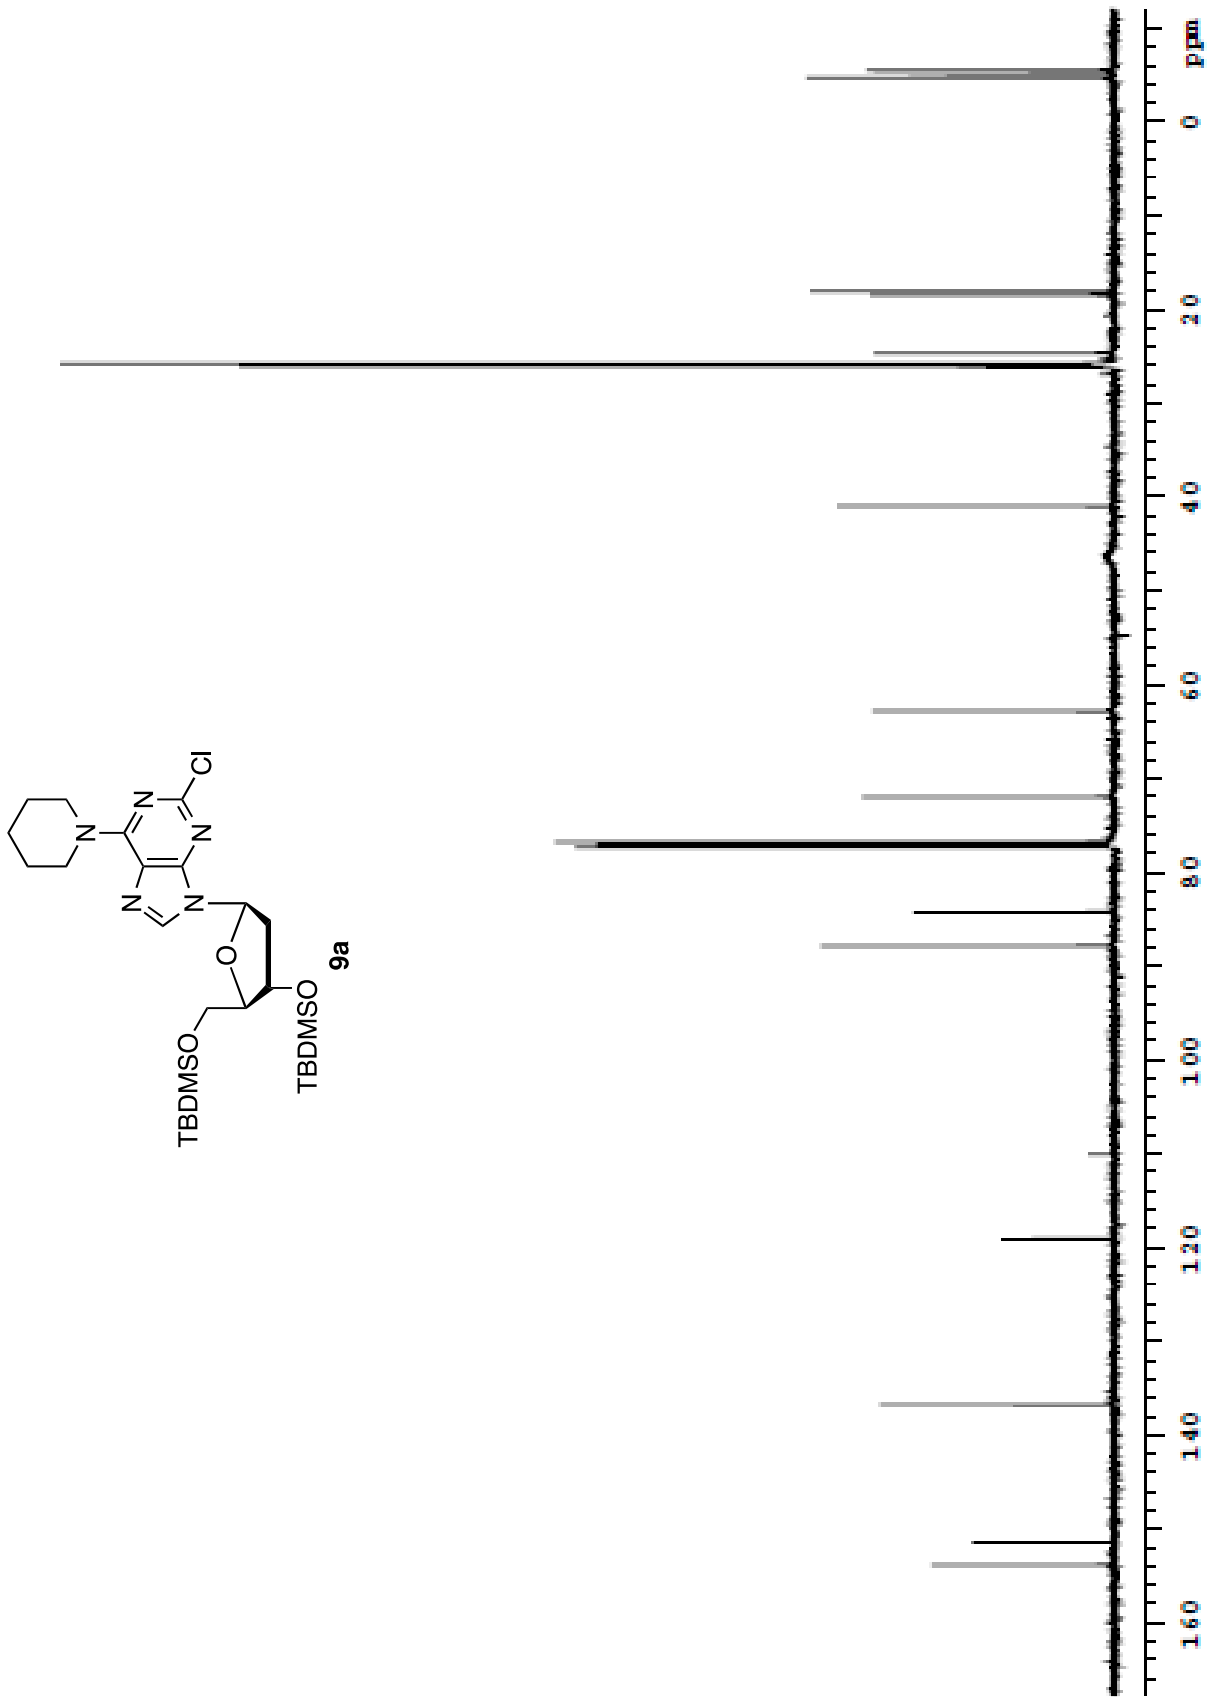

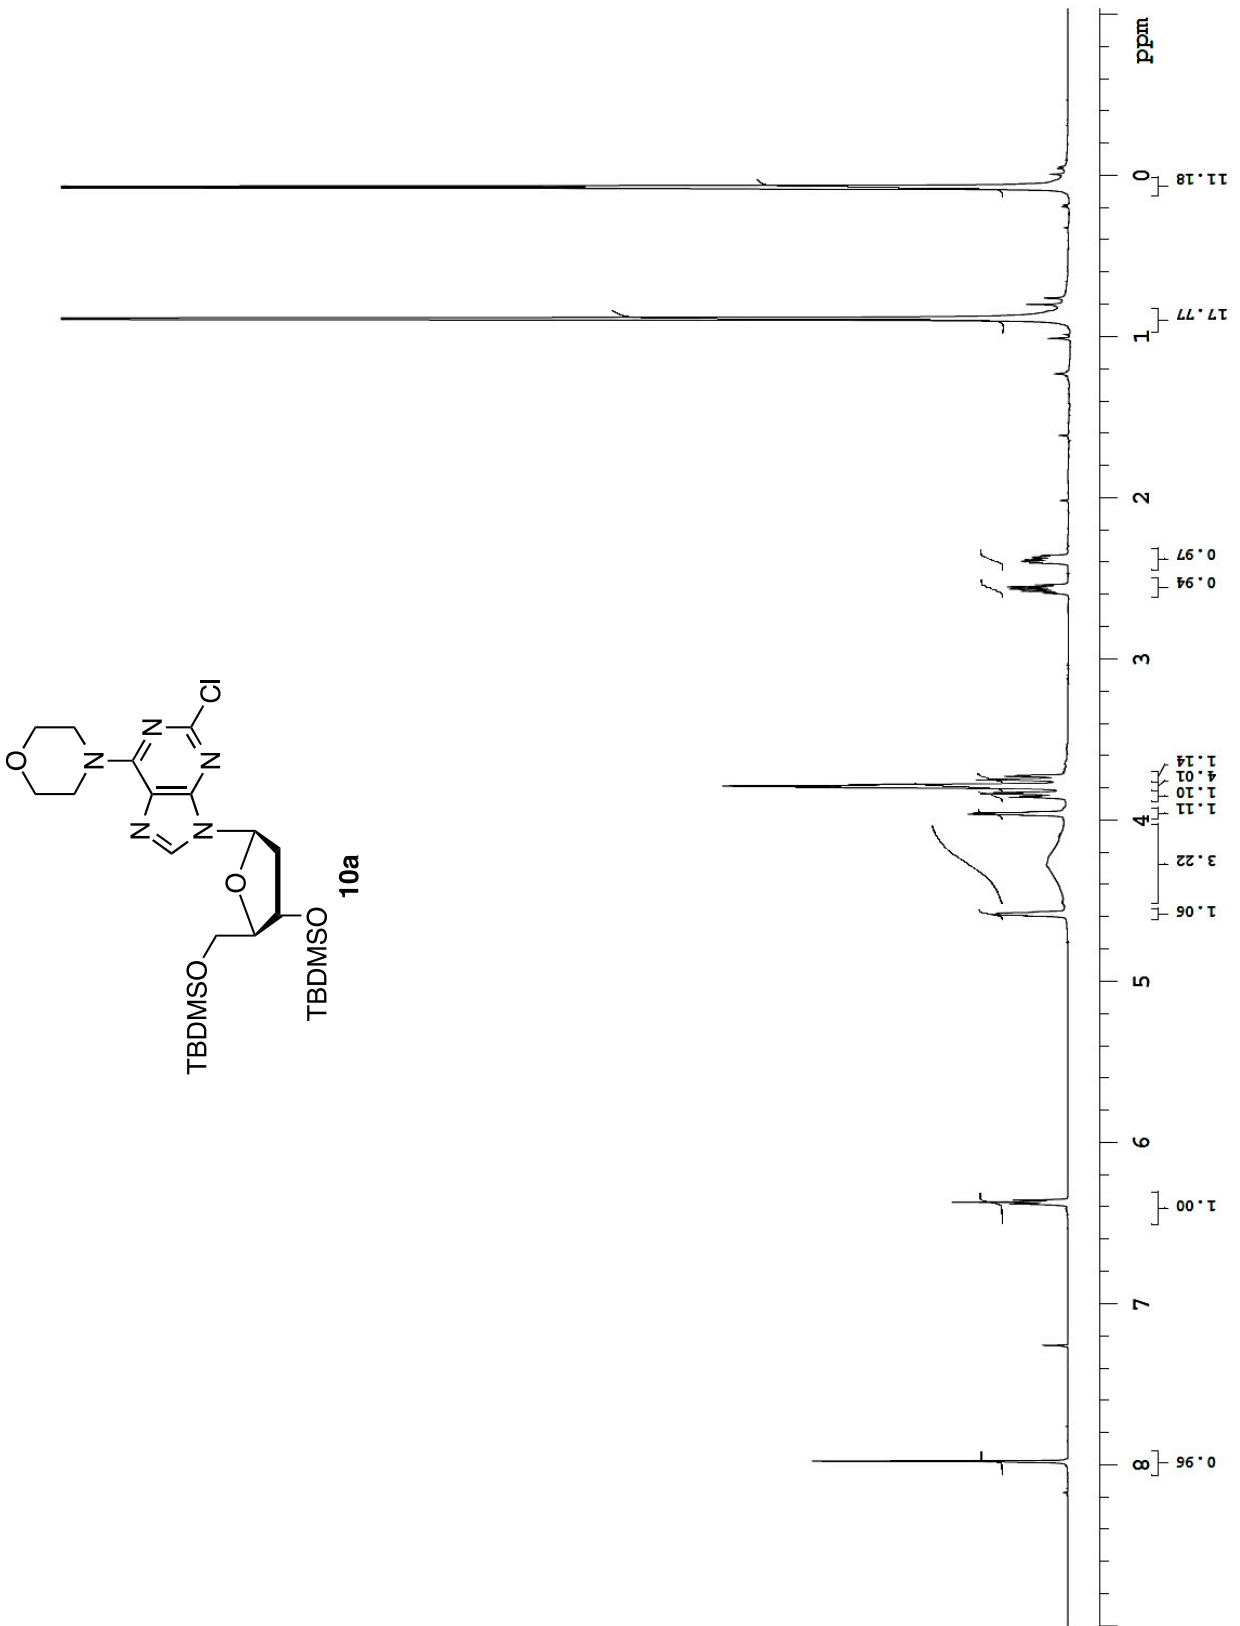

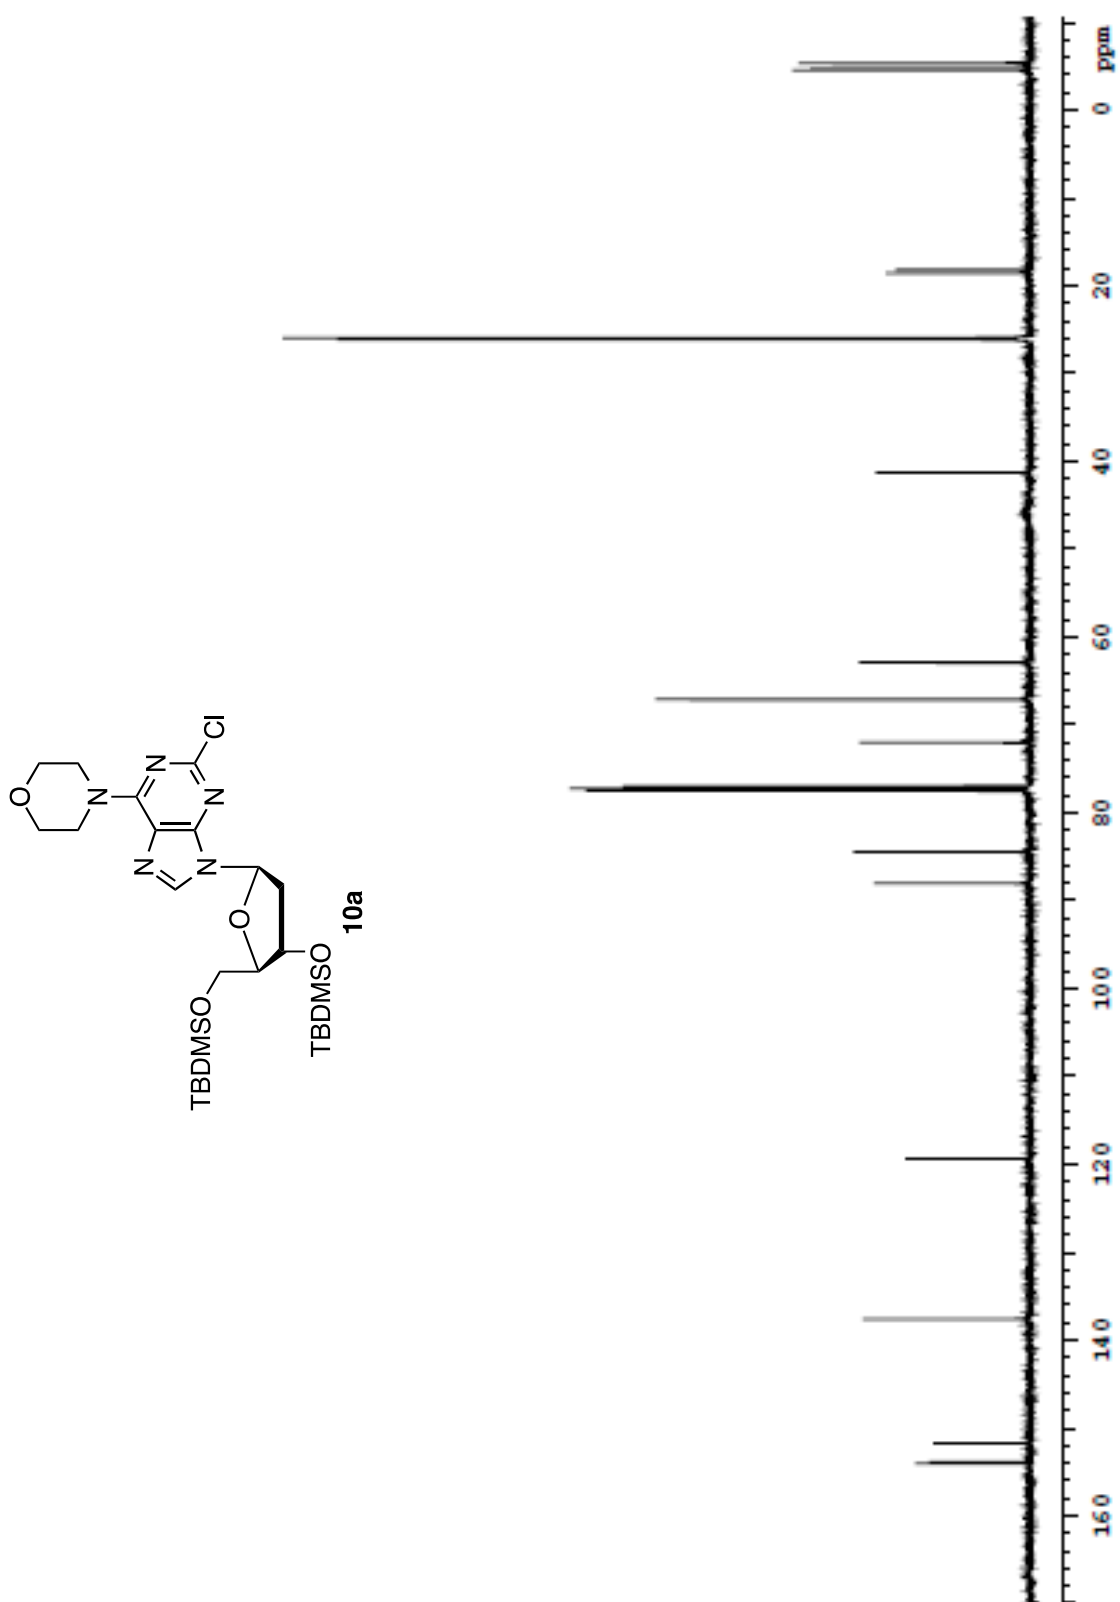



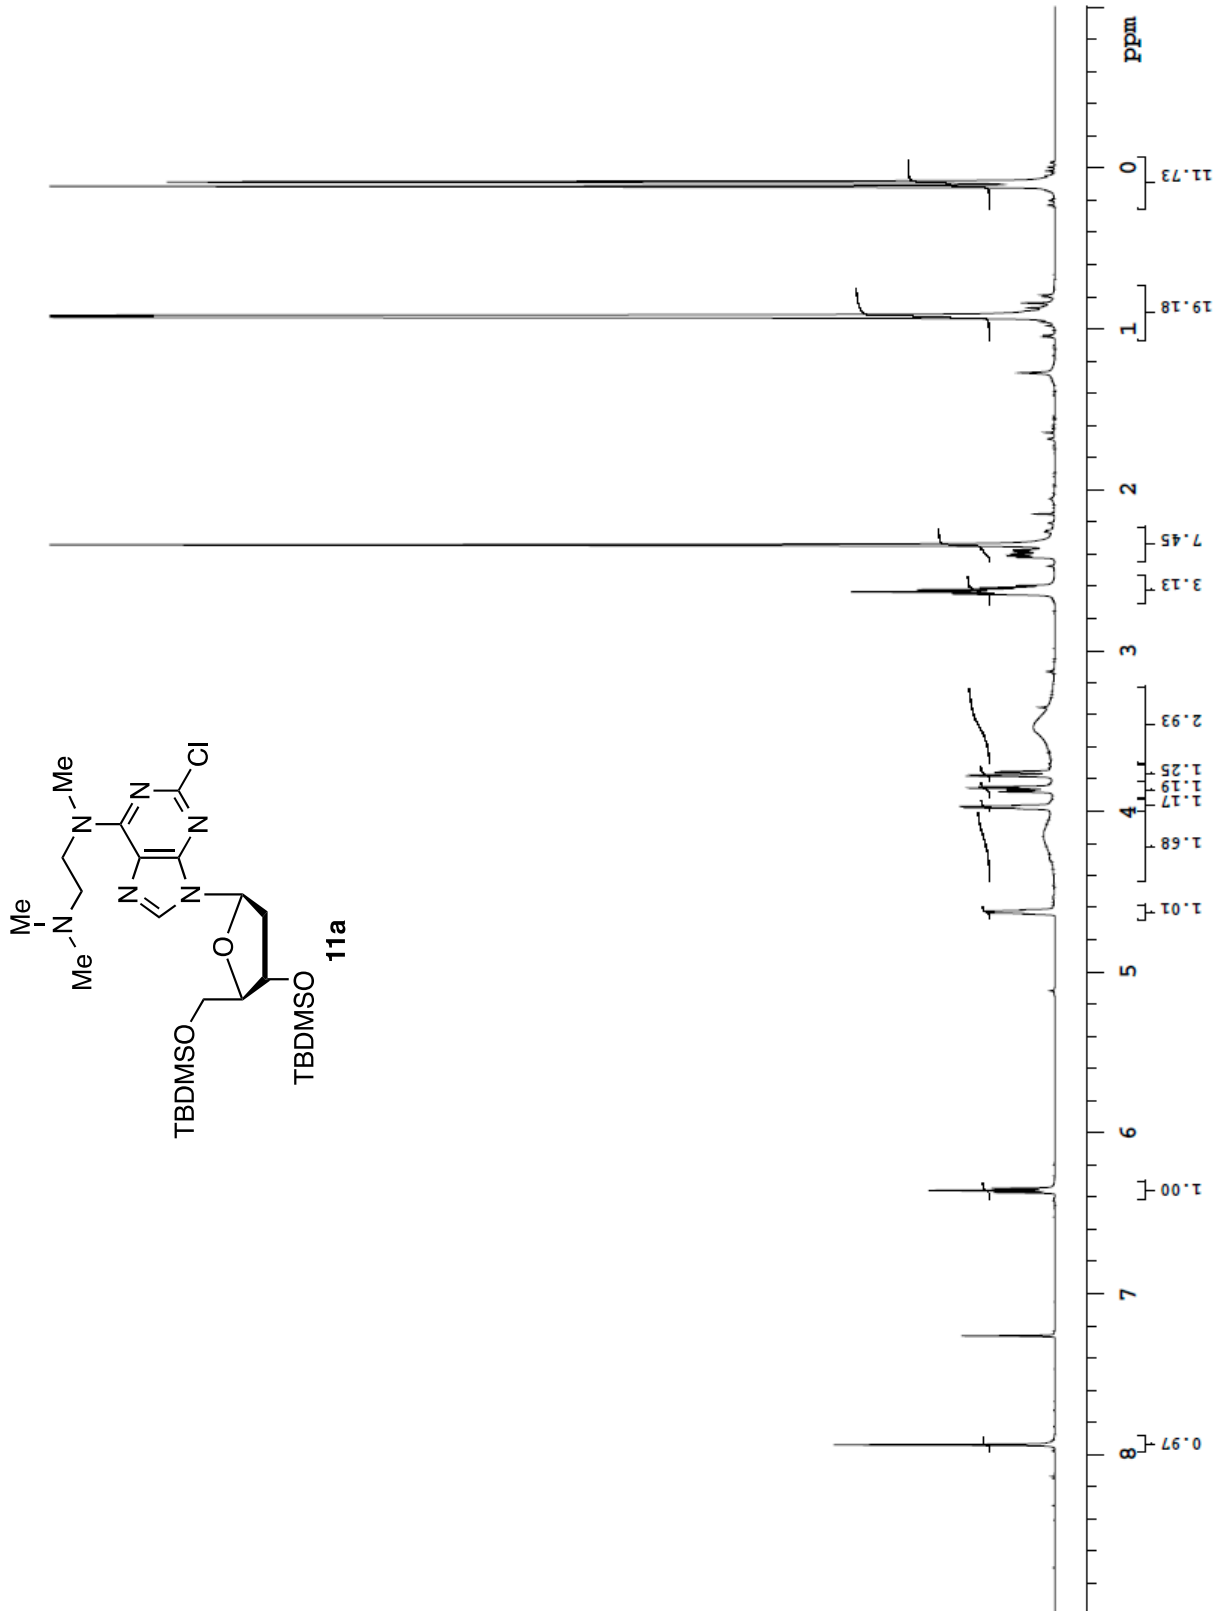

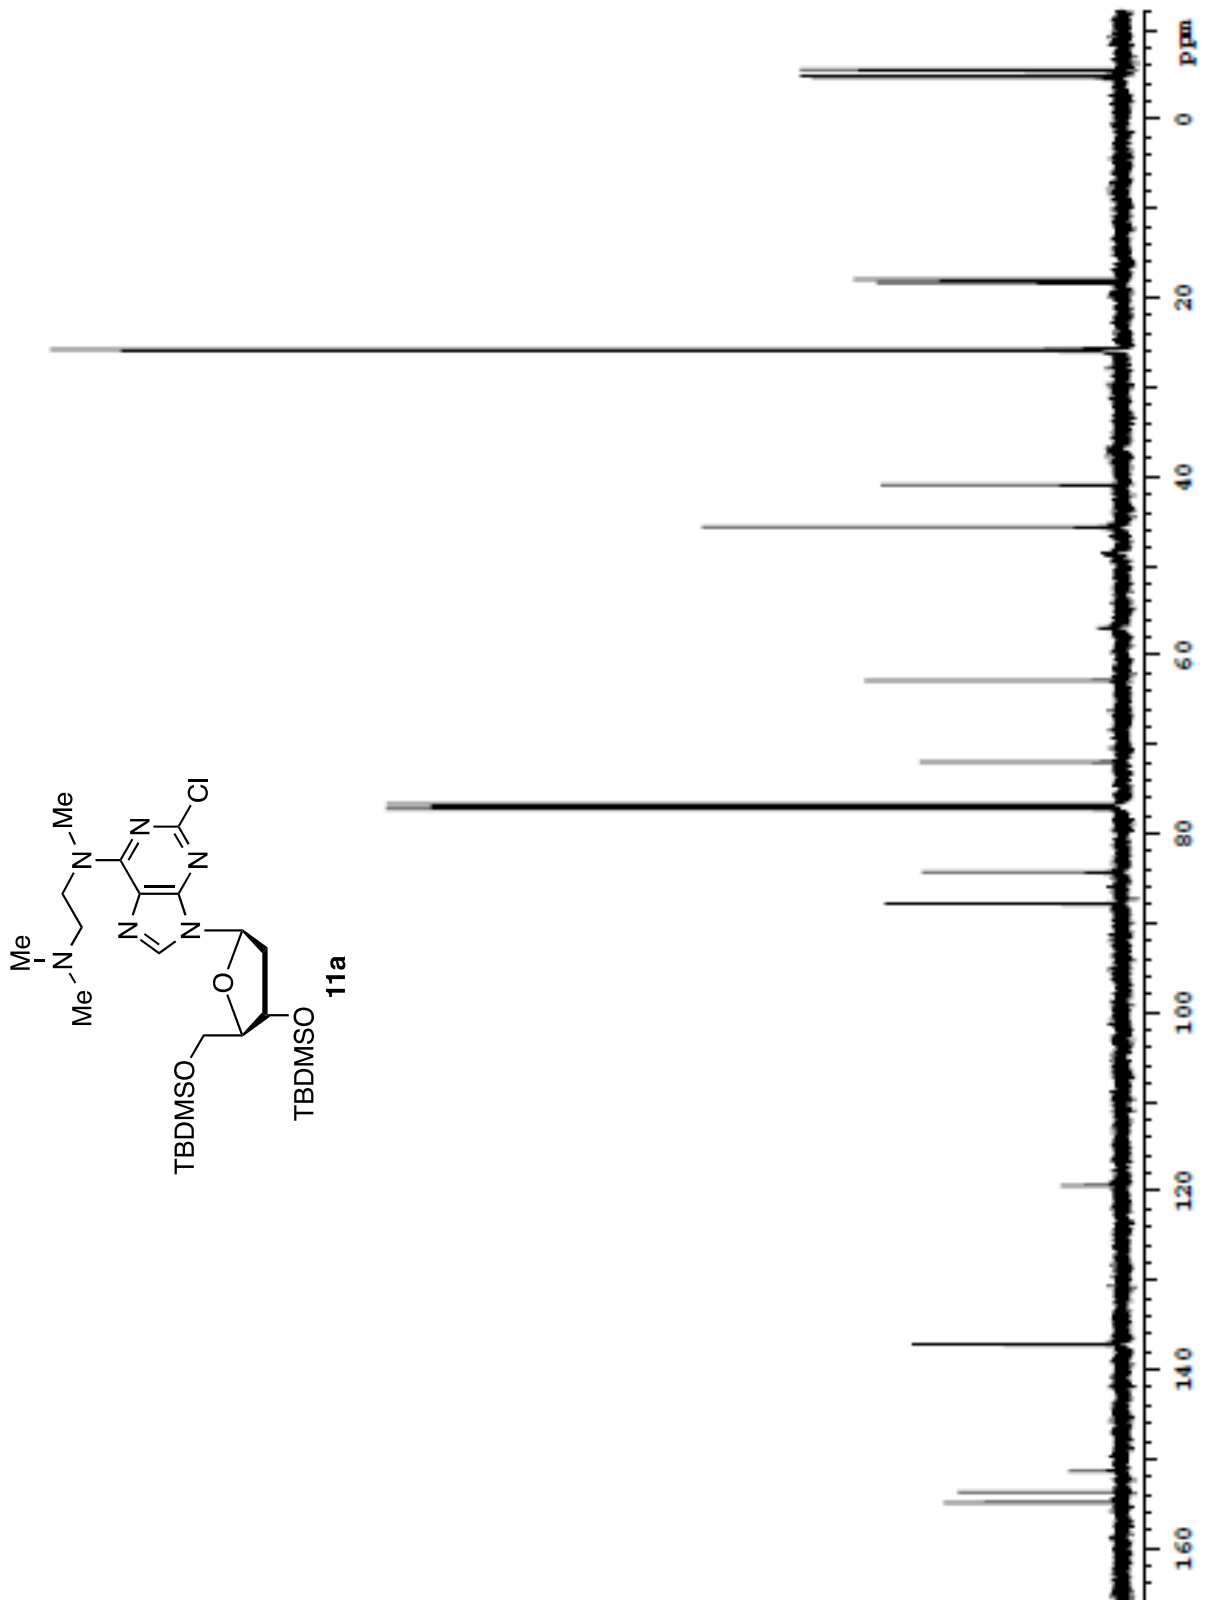

Sample Name :  
GVK-DD0397-CHLORO

Solvent: cdcl3  
Date: Mar 22 2015  
400 VNMRS/NRM-1/NMR-002

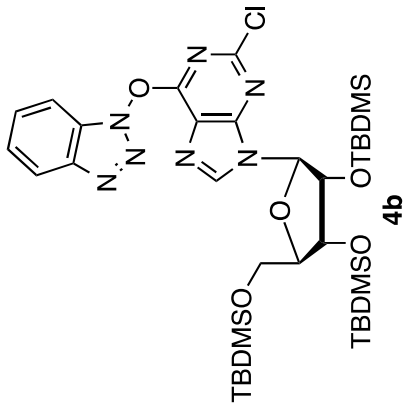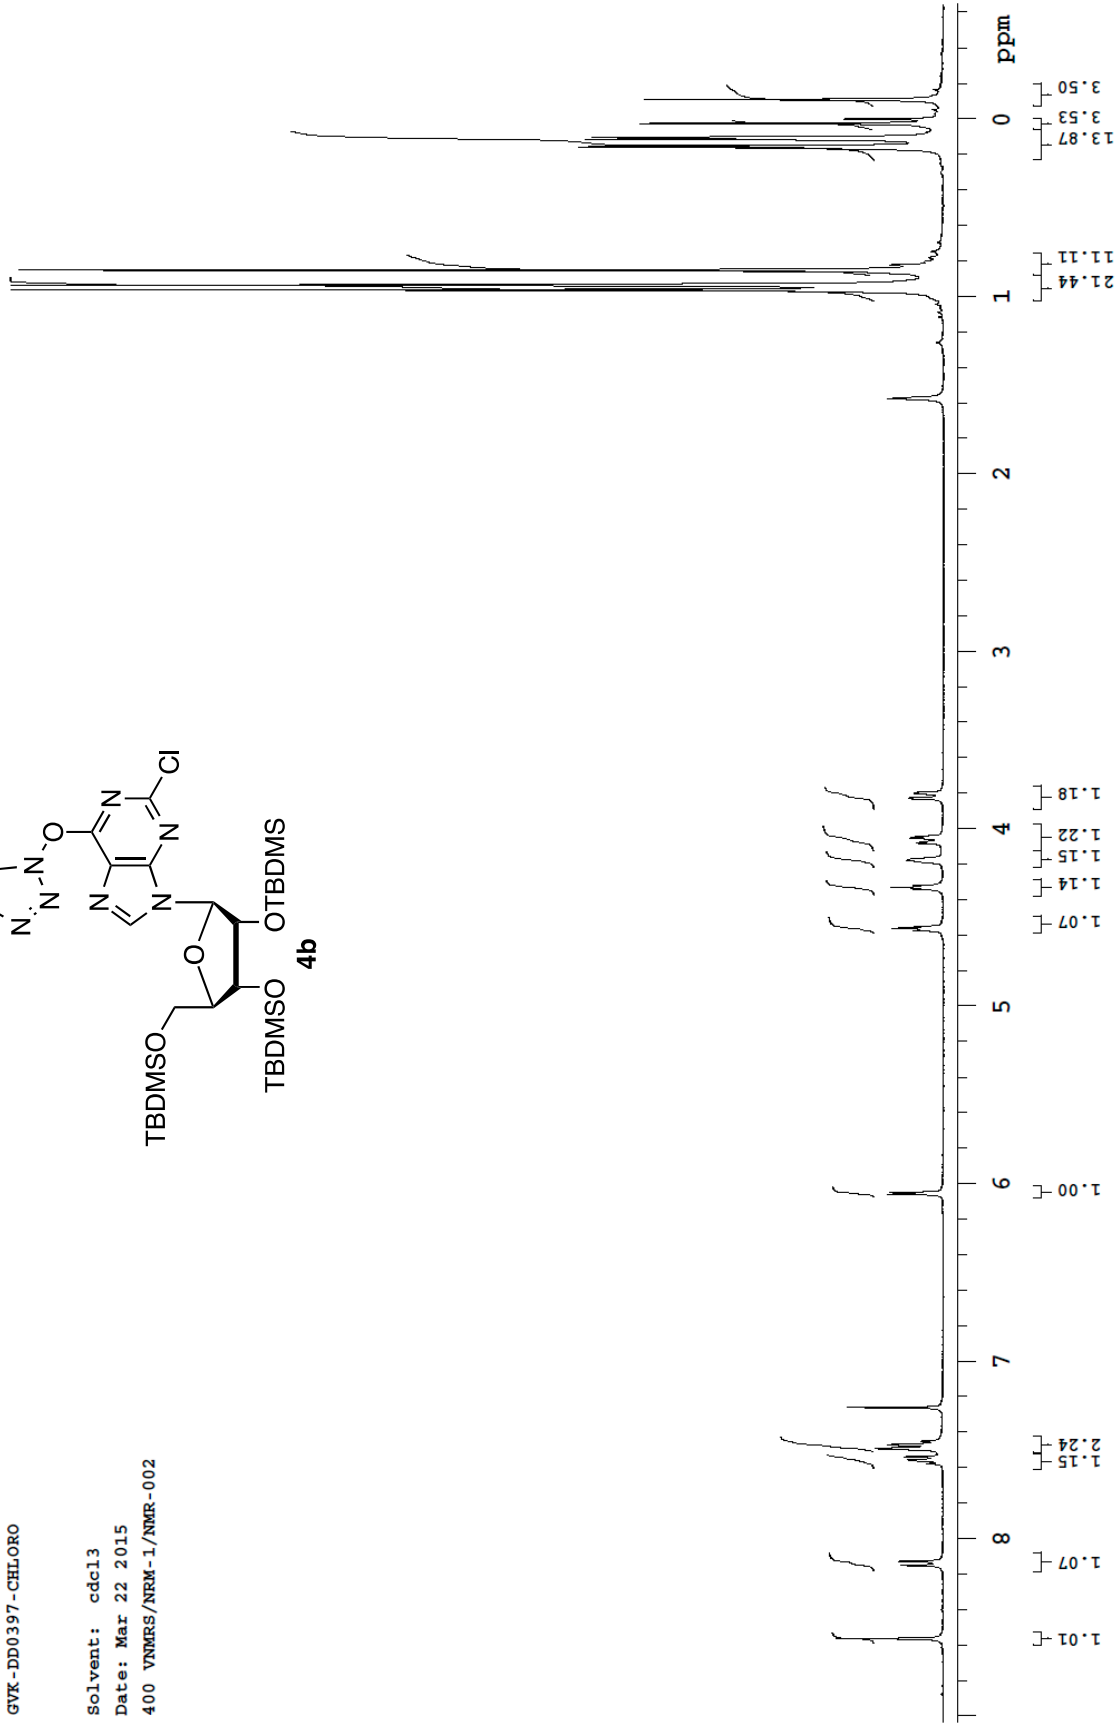

Sample Name :  
GVK-DD0397-CHLORO

Solvent: cdcl3  
Date: Mar 22 2015  
400 VNMRS/NRM-1/NMR-002

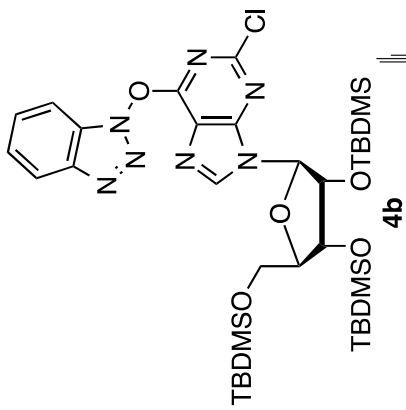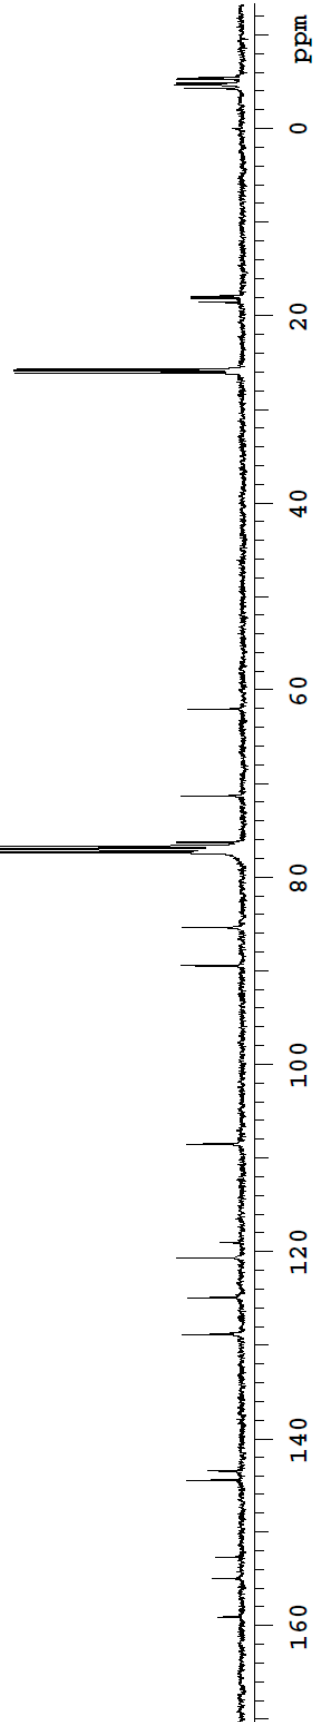

Plotname: 021503C2184\_CARBON\_01\_plot01

Sample Name :  
GVK-DD0397-E109832-A  
Solvent: cdcl3  
400-MR/NMR-1/NMR-001  
Date: Feb 27 2015

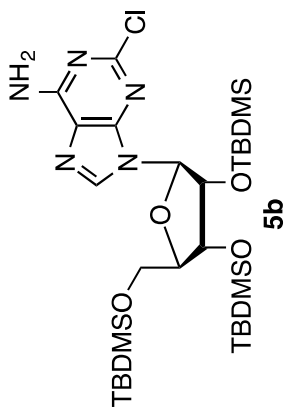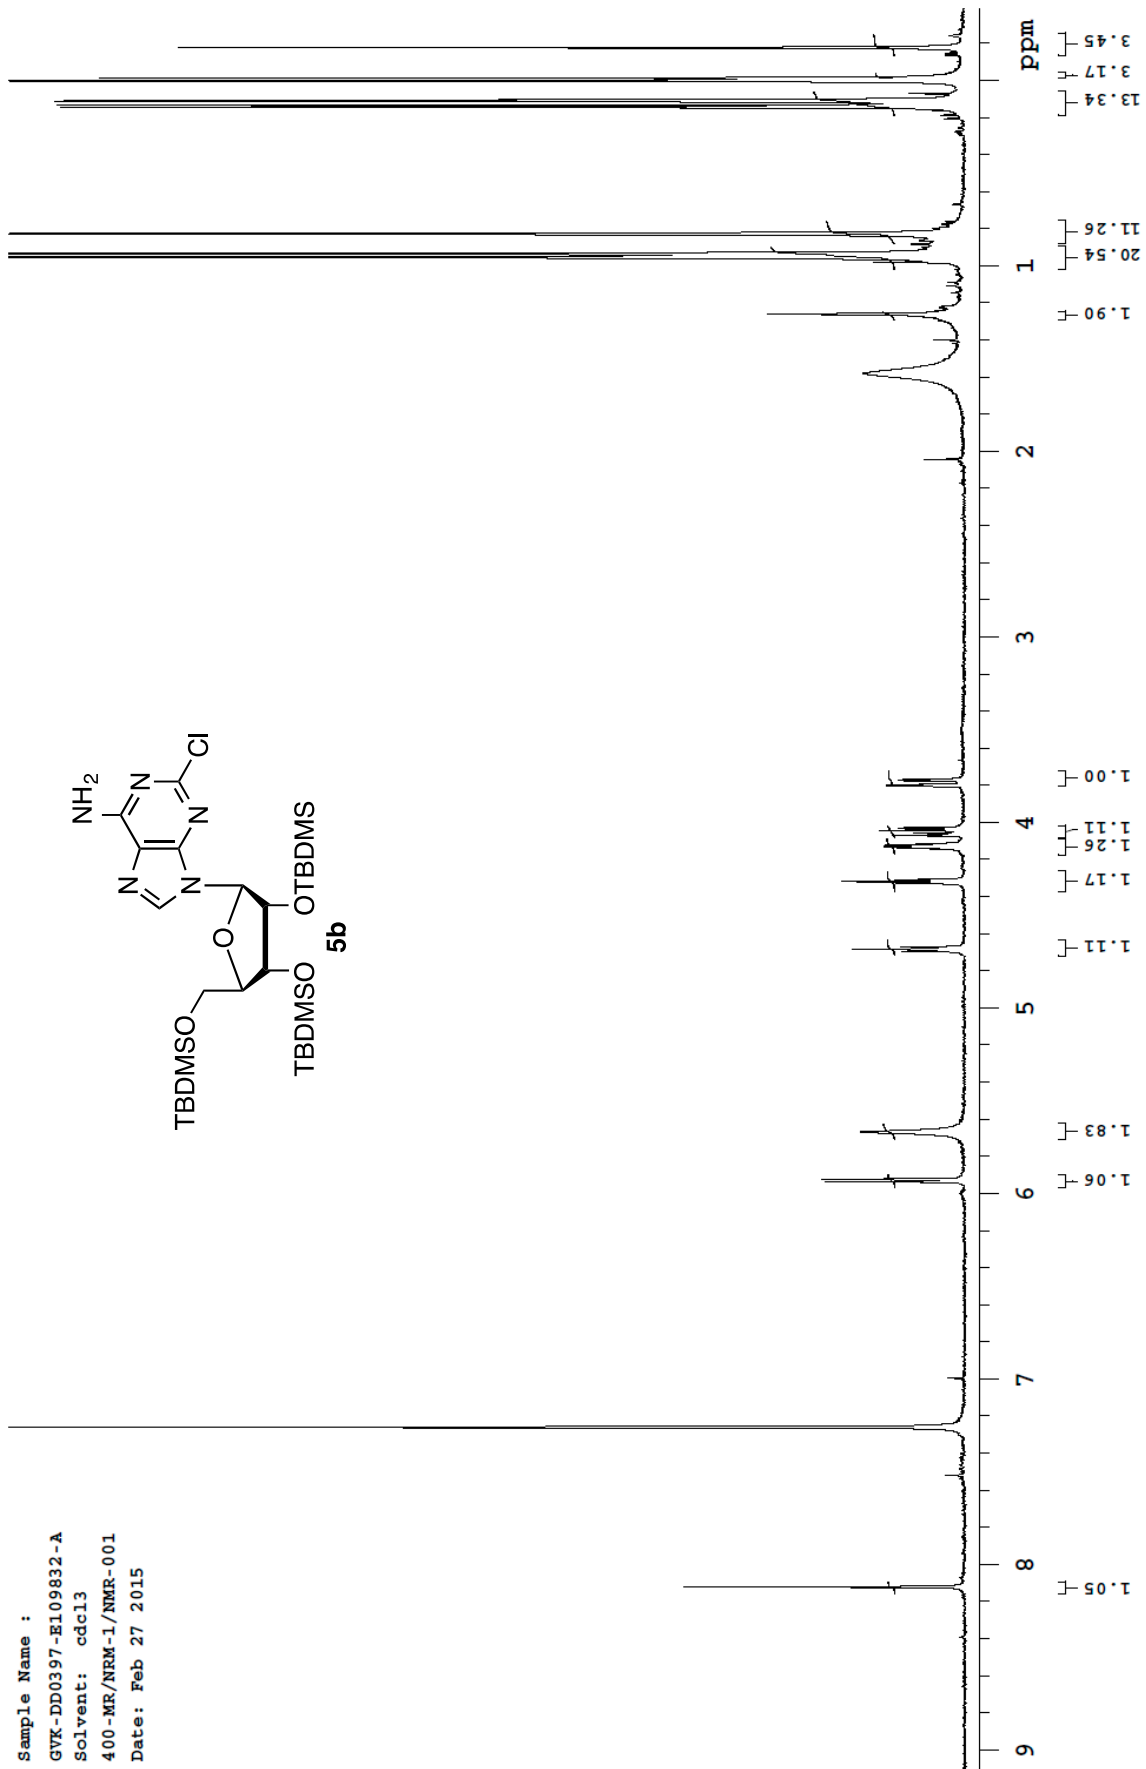

Plotname: 021502D3602\_PROTON\_01\_plot08

Sample Name :  
GVK-DD0-397-AMM-T

Solvent: cdcl3  
Date: Mar 28 2015  
400 VNMR5/NMR-1/NMR-002

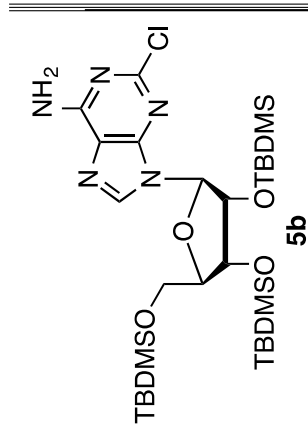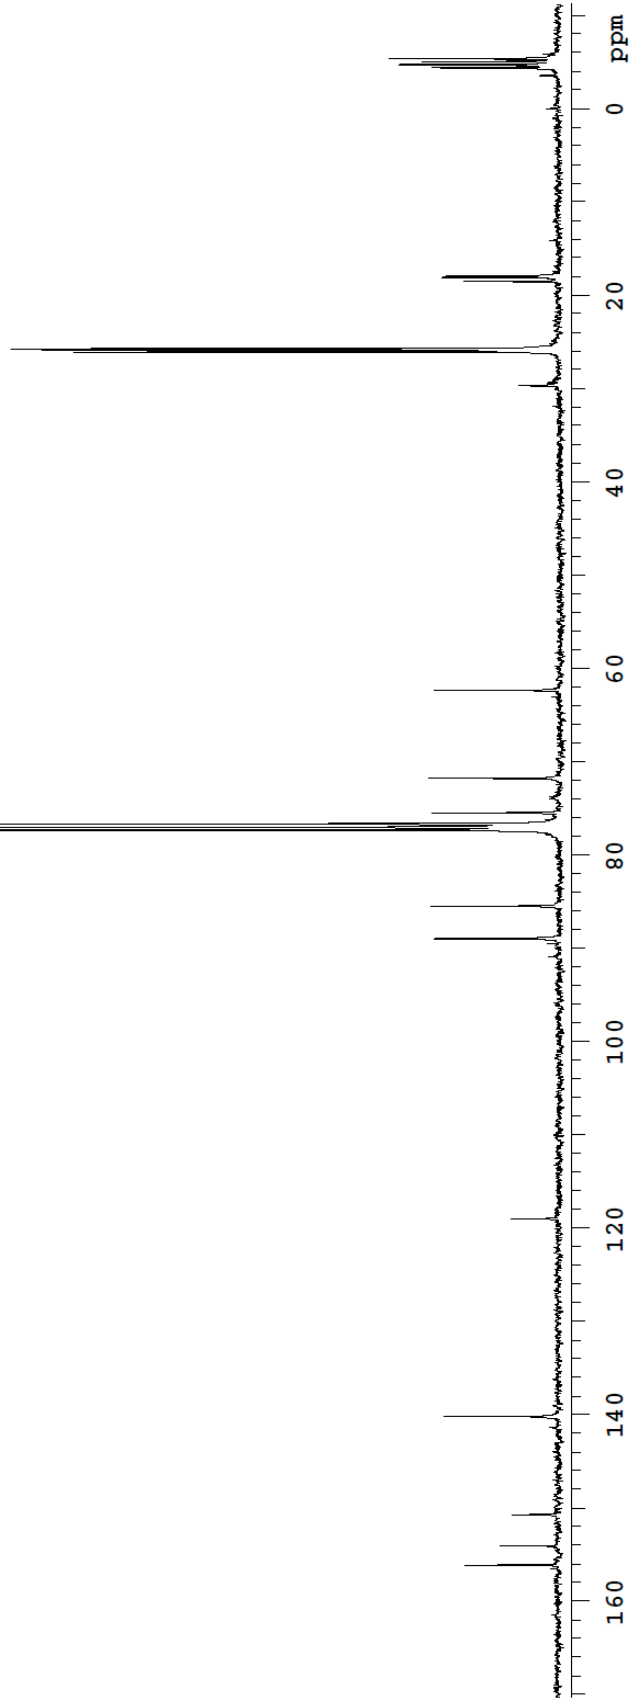

Plotname: 021503D2572\_CARBON\_01\_plot01

Sample Name :  
 GVK-DD0397-ME-T  
 Solvent: cdcl3  
 400-MR/NRM-1/NMR-001  
 Date: Mar 29 2015

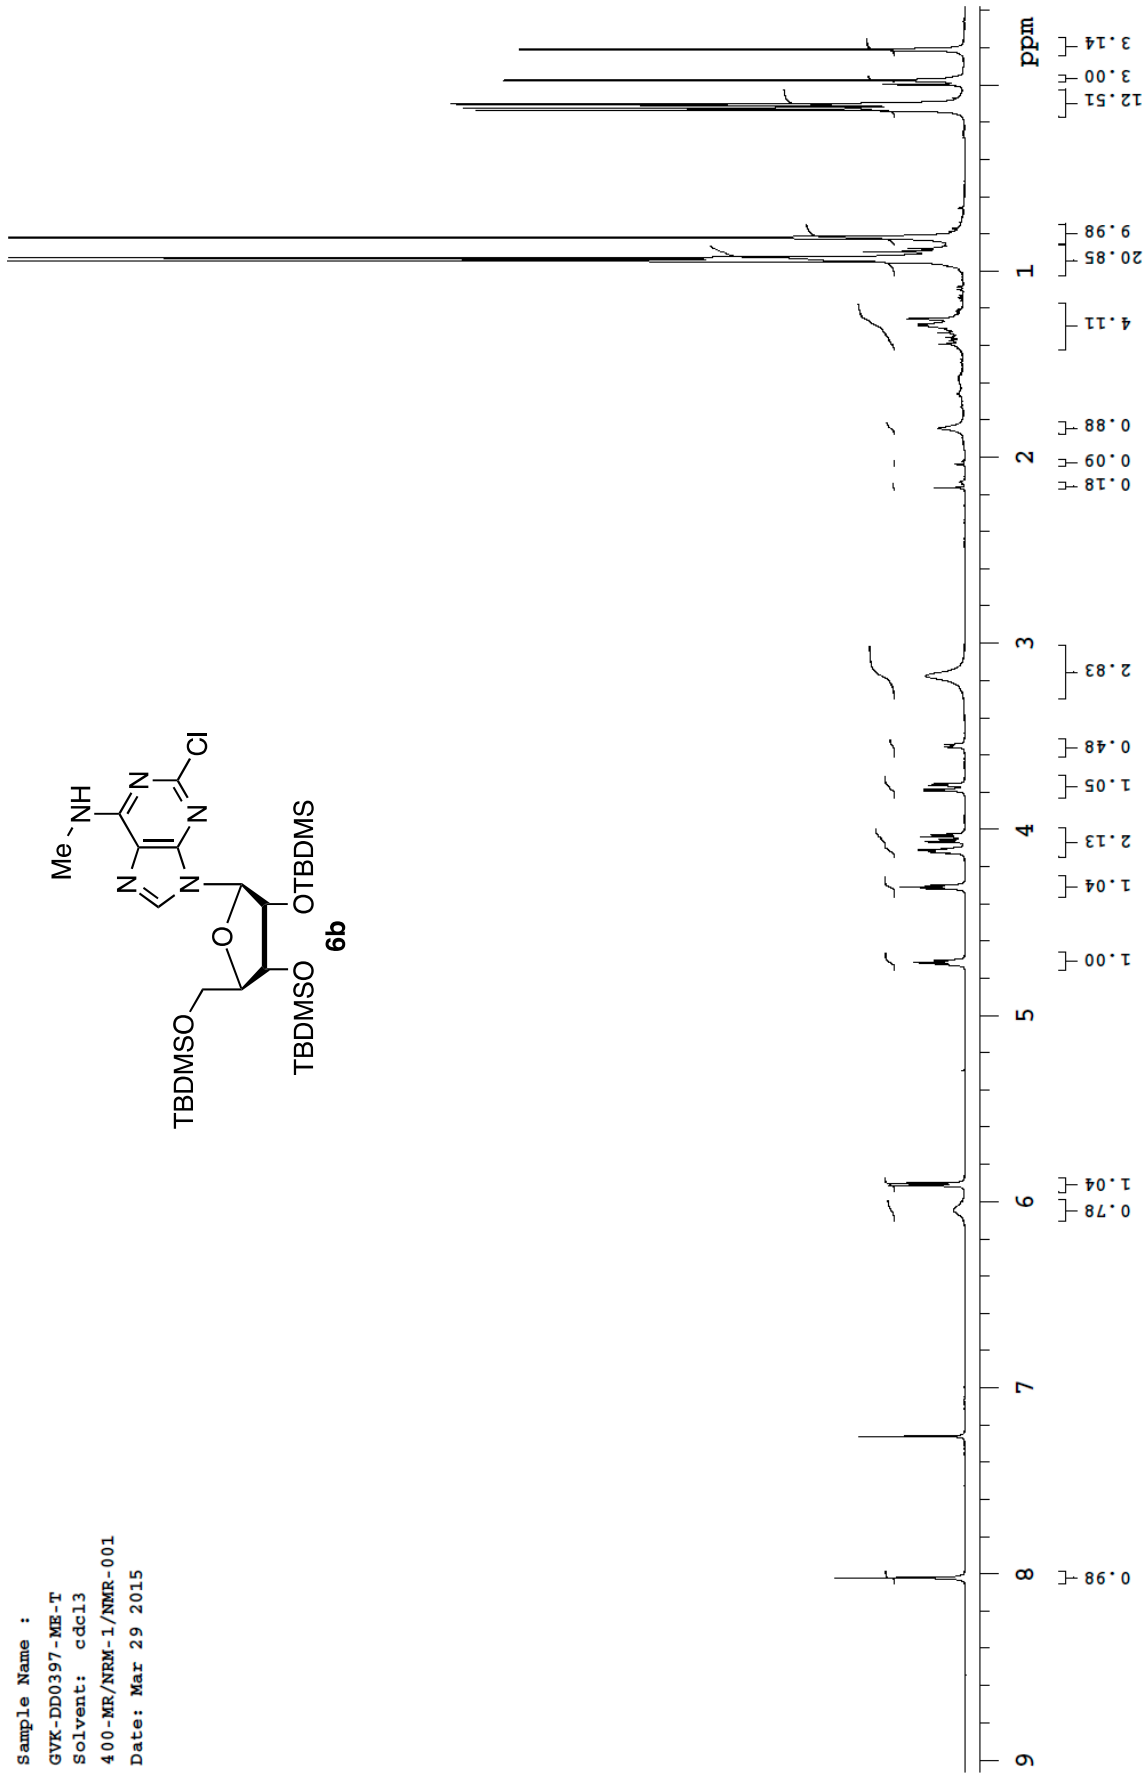

Plotname: 021503D2577\_PROTON\_01\_plot07

Sample Name :  
GVK-DD0397-ME-T  
Solvent: cdcl3  
400-MR/NMR-1/NMR-001  
Date: Mar 29 2015

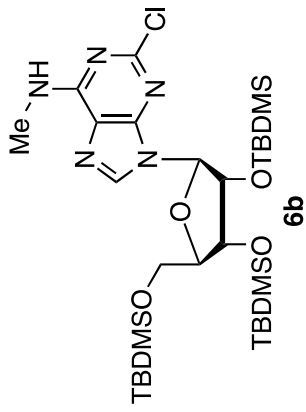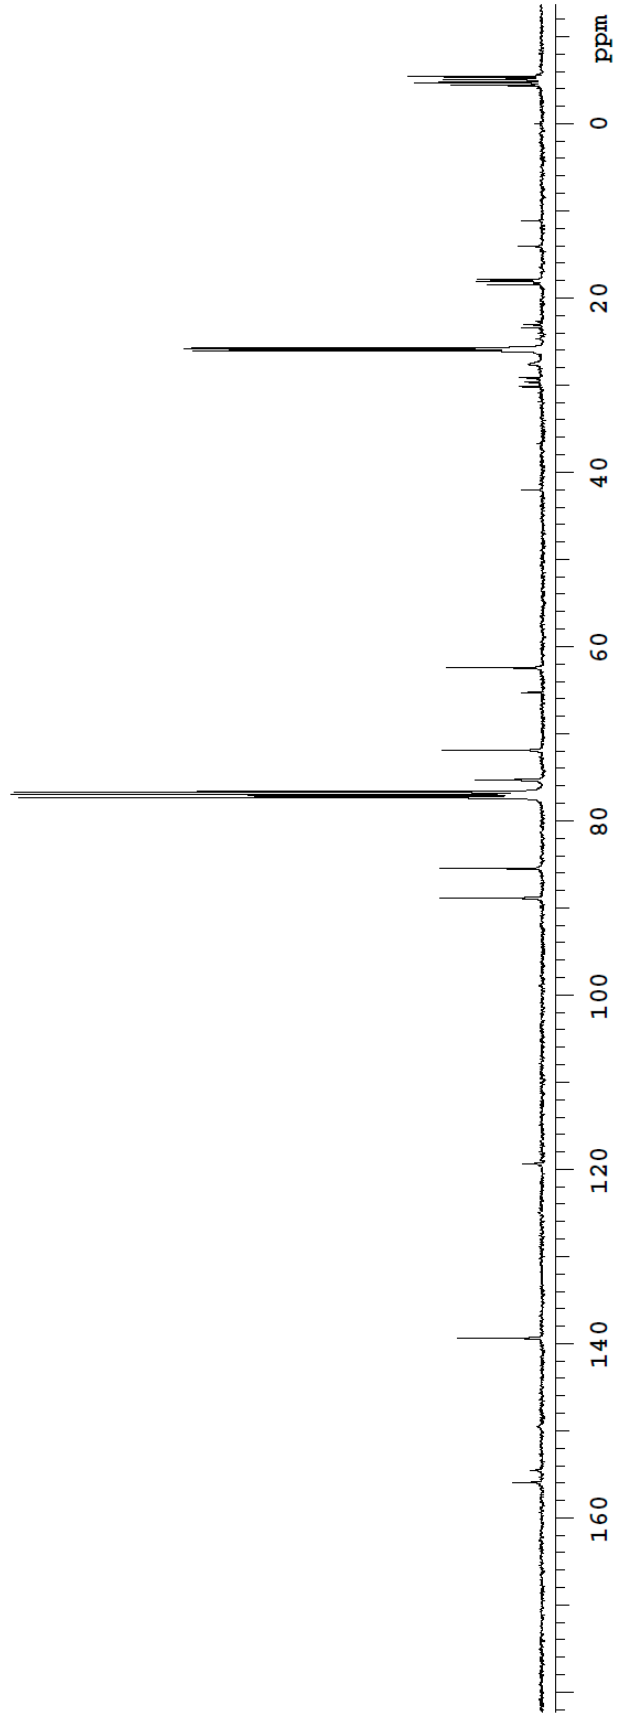

Plotname: 021503D2577\_CARBON\_01\_plot01



Sample Name :  
GVX-DD0-397-DME-T

Solvent: cdcl3  
Date: Mar 28 2015  
400 VNMRS/NRM-1/NMR-002

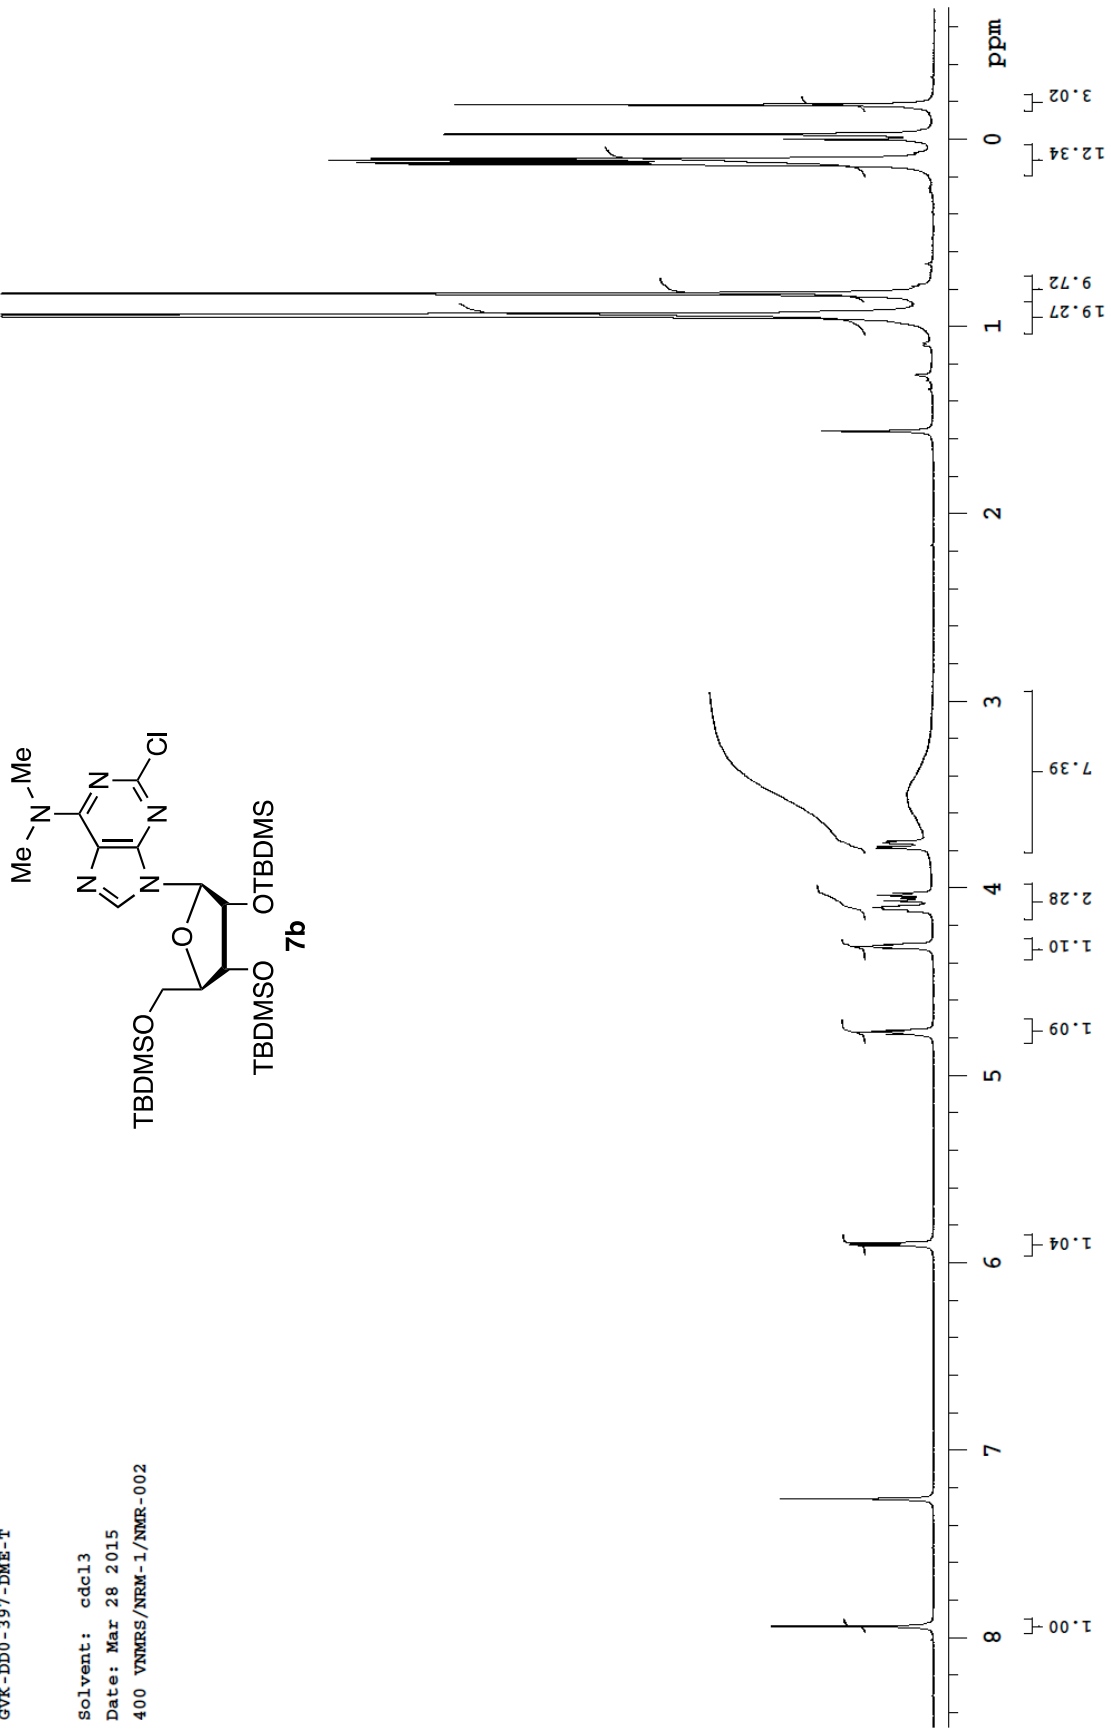

Plotname: 021503D2595\_PROTON\_01\_plot08

Sample Name :  
GVK-DD0-397-DME-T  
Solvent: cdcl3  
Date: Mar 28 2015  
400 VNMRS/NRM-1/NMR-002

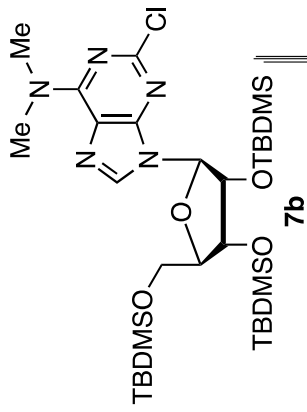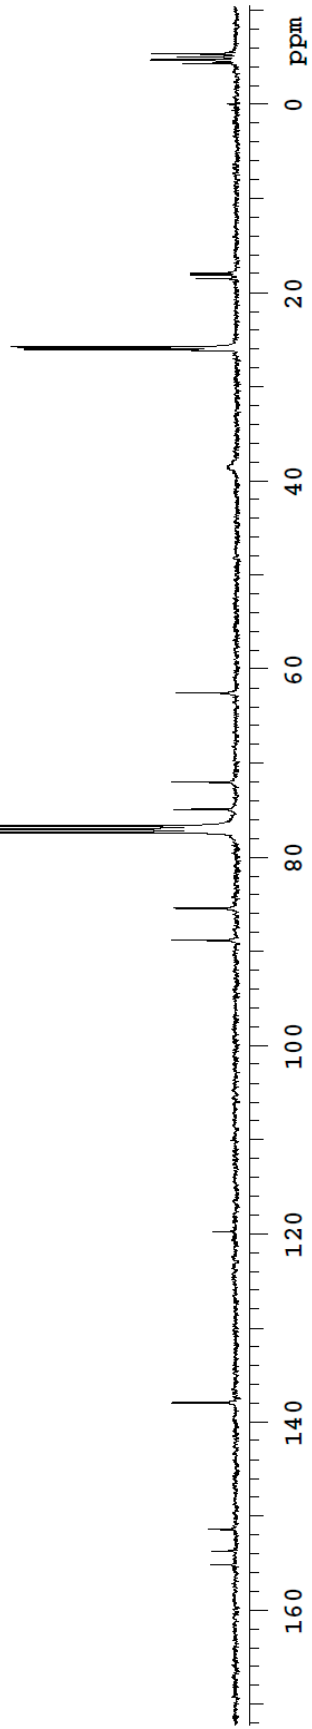

Plotname: 021503D2595\_CARBON\_01\_plot01

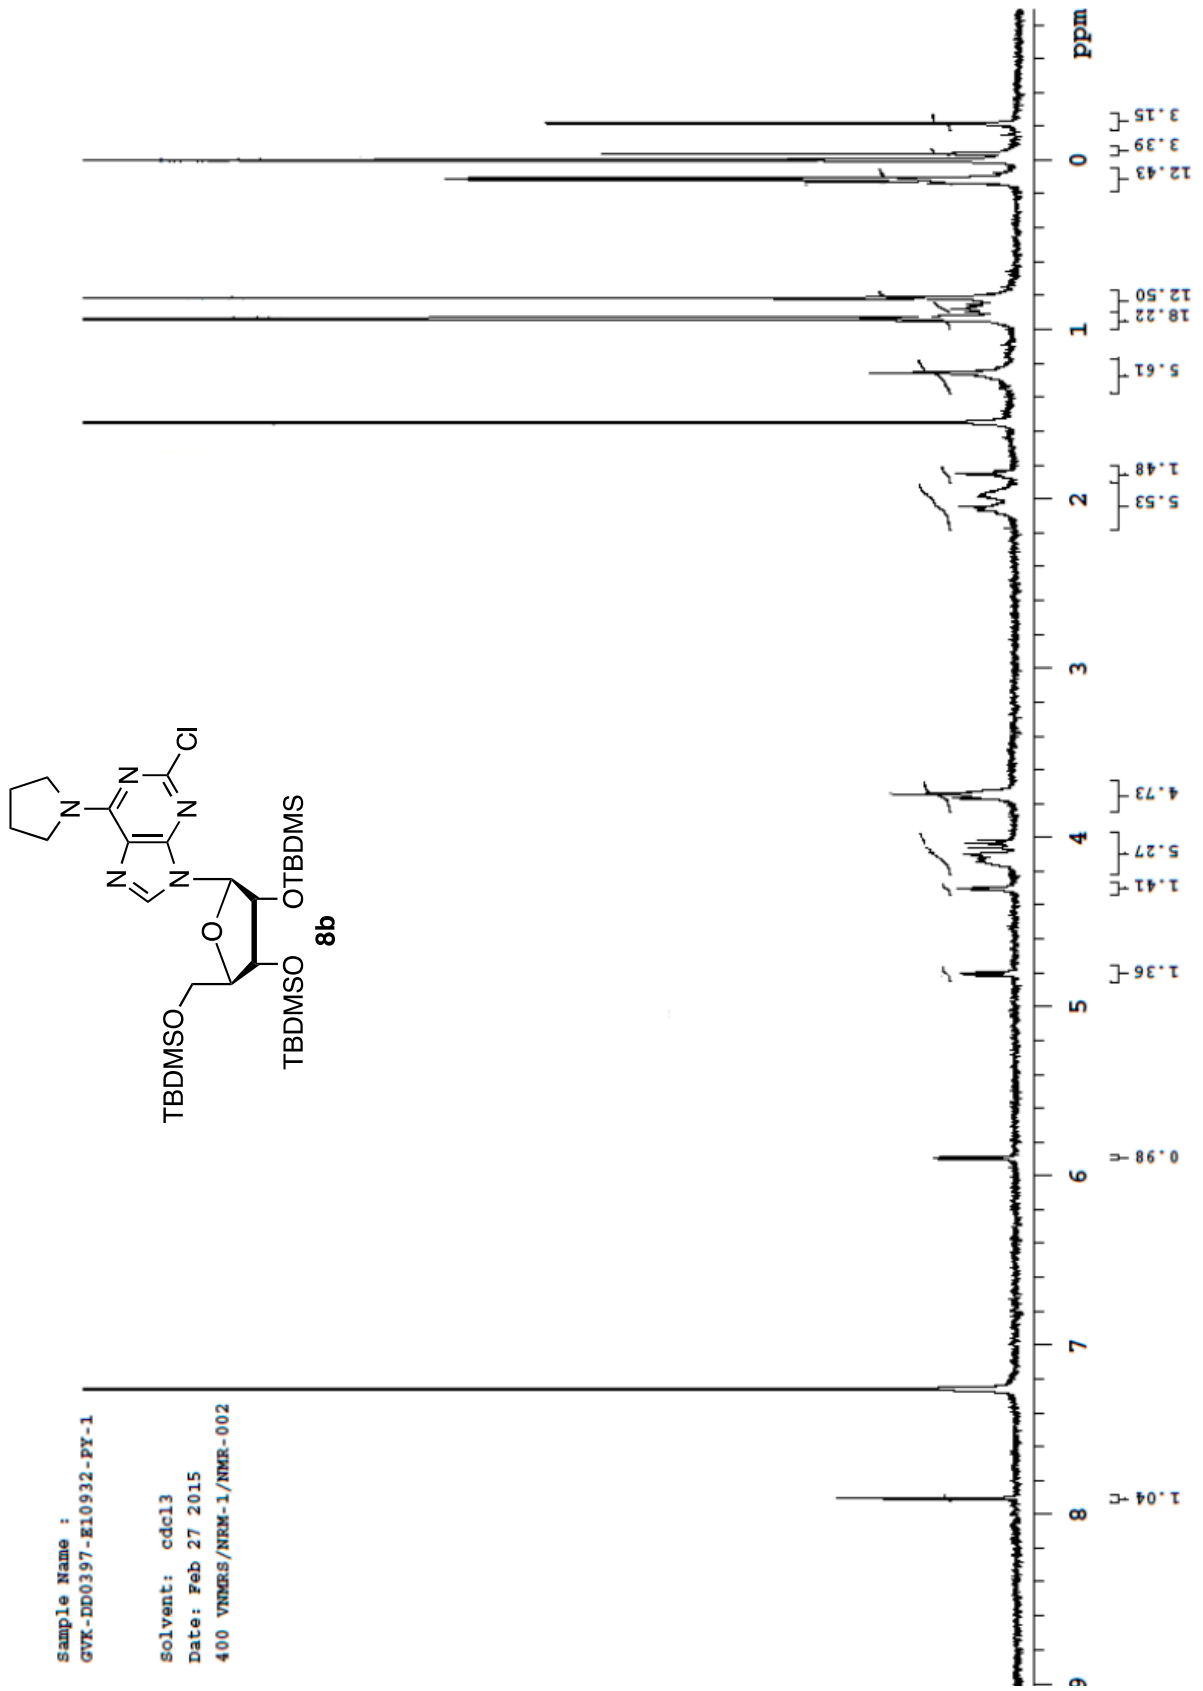

Sample Name :  
GVK-DD0397-PYRROLIDINE  
Solvent: cdcl3  
400-MR/NMR-1/NMR-001  
Date: Apr 25 2015

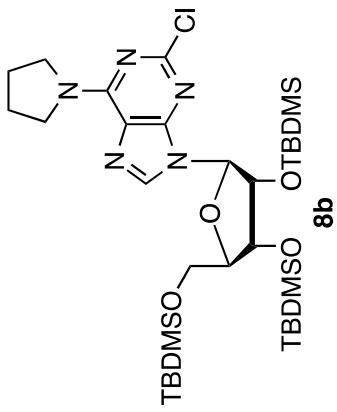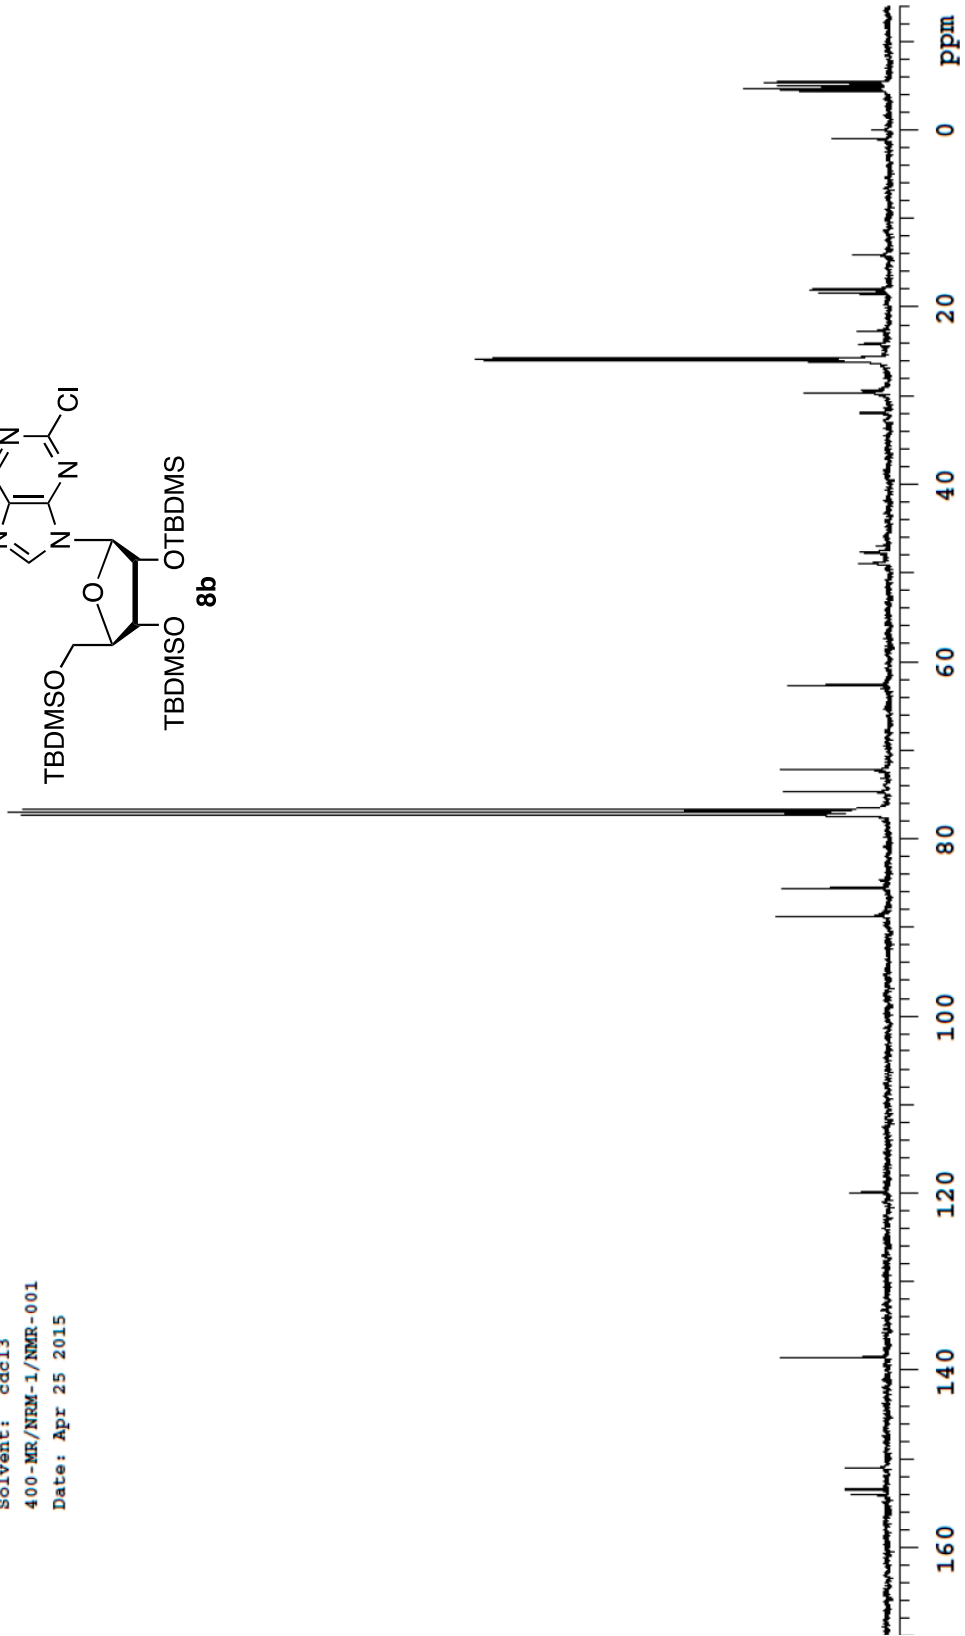



Sample Name :  
GVK-DD0-397-PIP-T  
Solvent: cdcl3  
Date: Mar 29 2015  
400 VNMRS/NRM-1/NMR-002

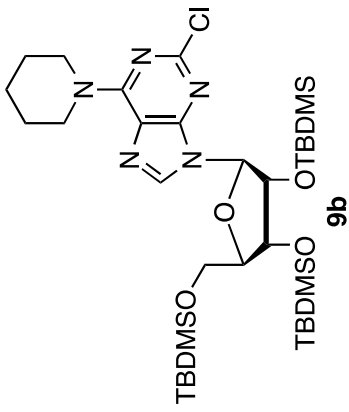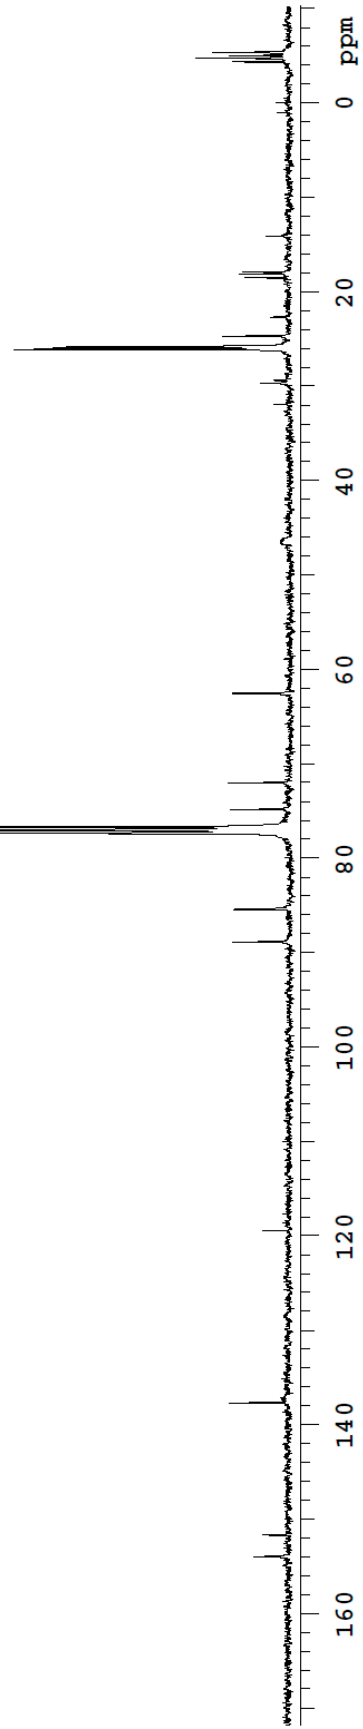

Plotname: 021503D2568\_CARBON\_01\_plot01

Sample Name :  
GVK-DD0397-E109832-M  
Solvent: cdcl3  
400-MR/NRM-1/NMR-001  
Date: Feb 27 2015

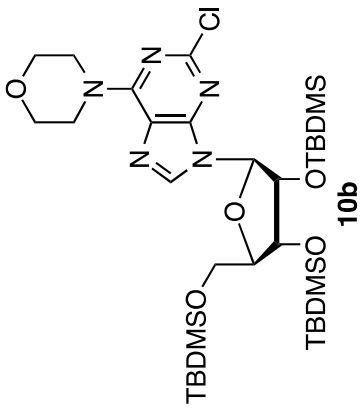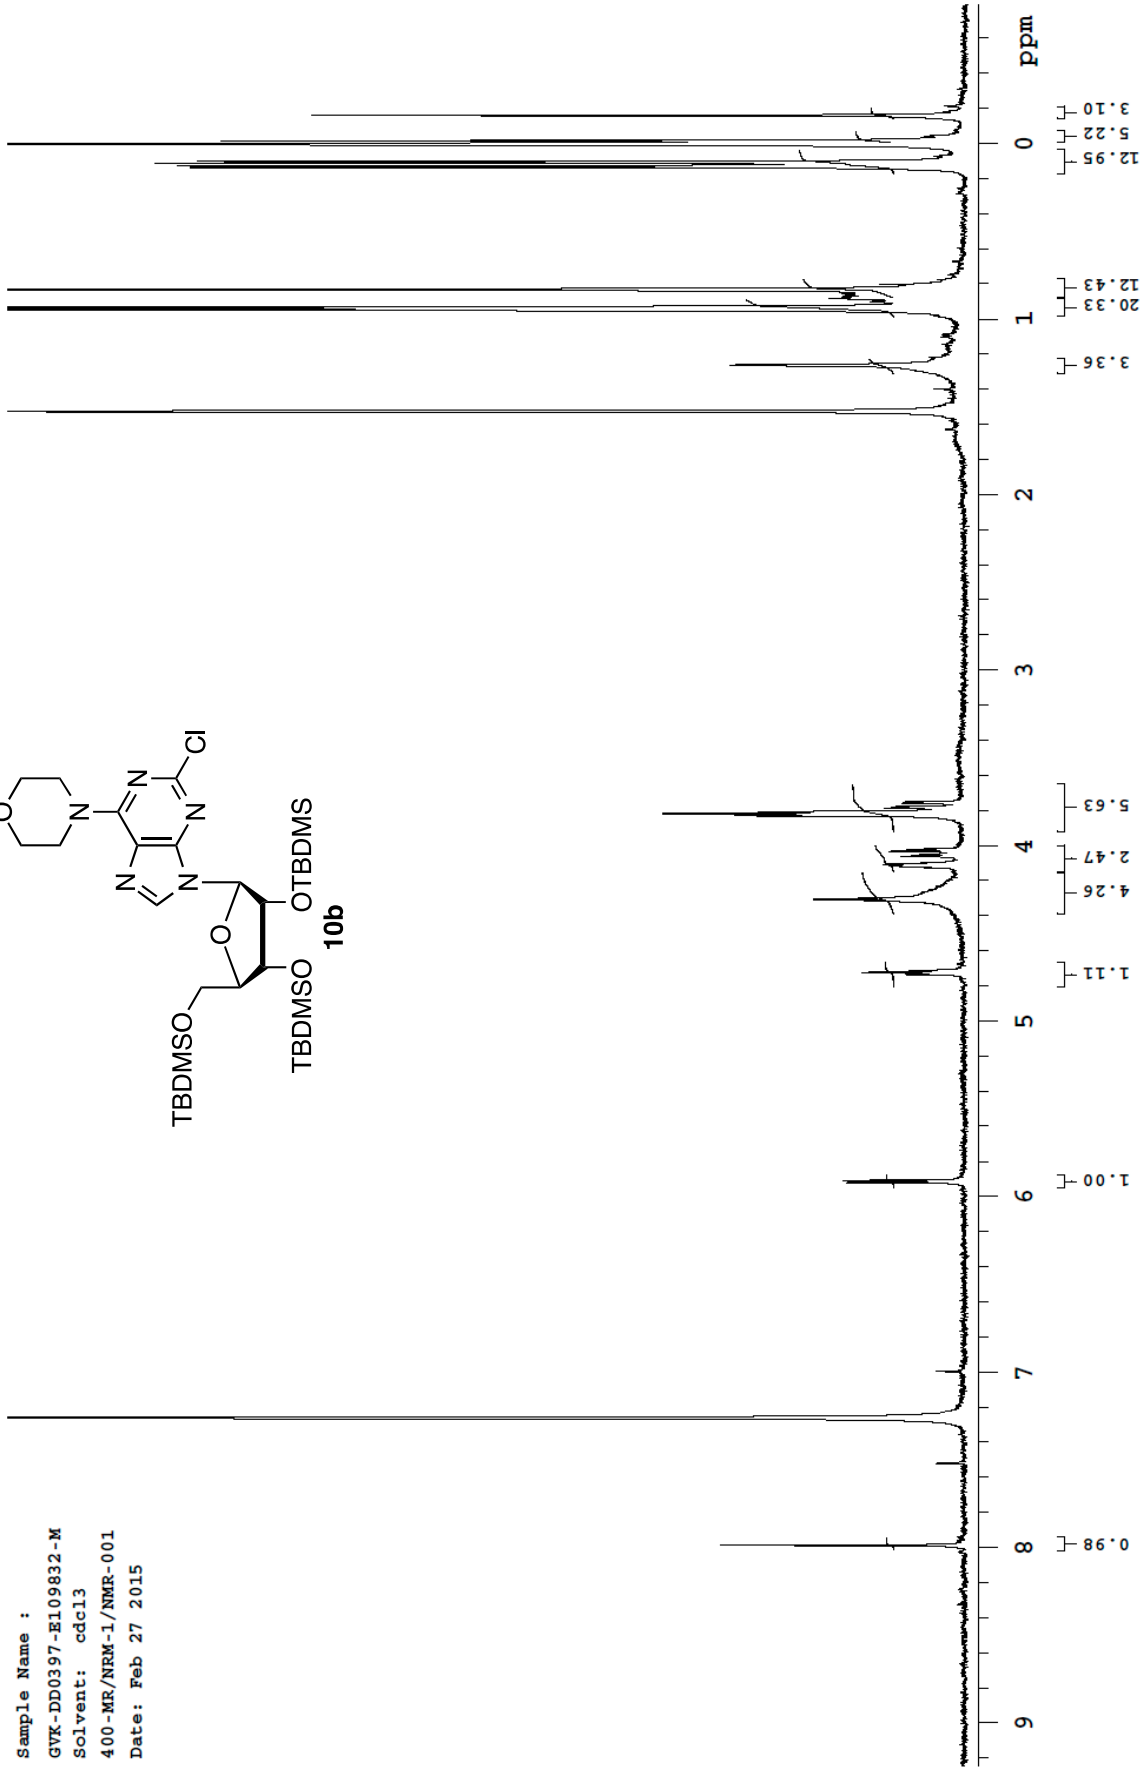

Plotname: 021502D3581\_PROTON\_01\_plot06

Sample Name :  
GVK-DD0397-MOR-T

Solvent: cdcl3  
Date: May 4 2015  
400 VNMR/NMR-1/NMR-002

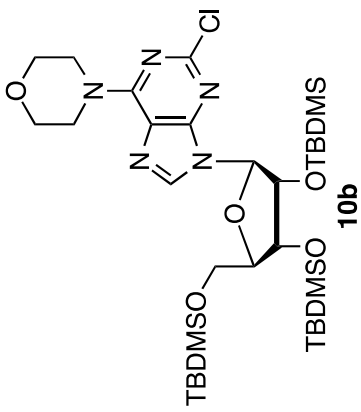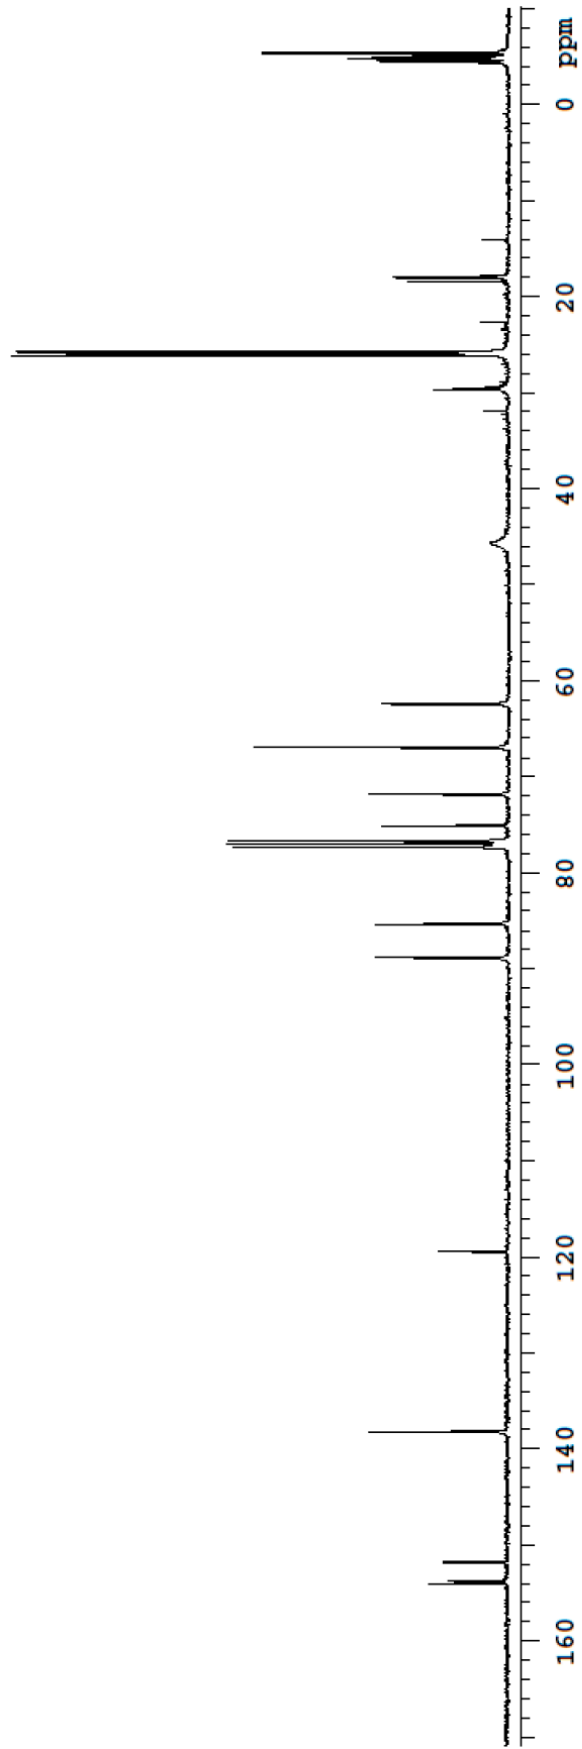



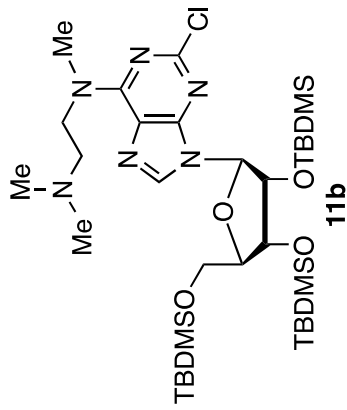

Sample Name: GVK-DD0-397-TME-T  
 Solvent: cdcl3  
 400 VMRS/NMR-1/NMR-002  
 Temp. 30.0 C / 303.1 K  
 Relax. delay 1.000 sec  
 Acq. time 1.000 sec  
 Pulse 30.0 degrees  
 Line broadening 0.5 Hz  
 Date: Mar 29 2015

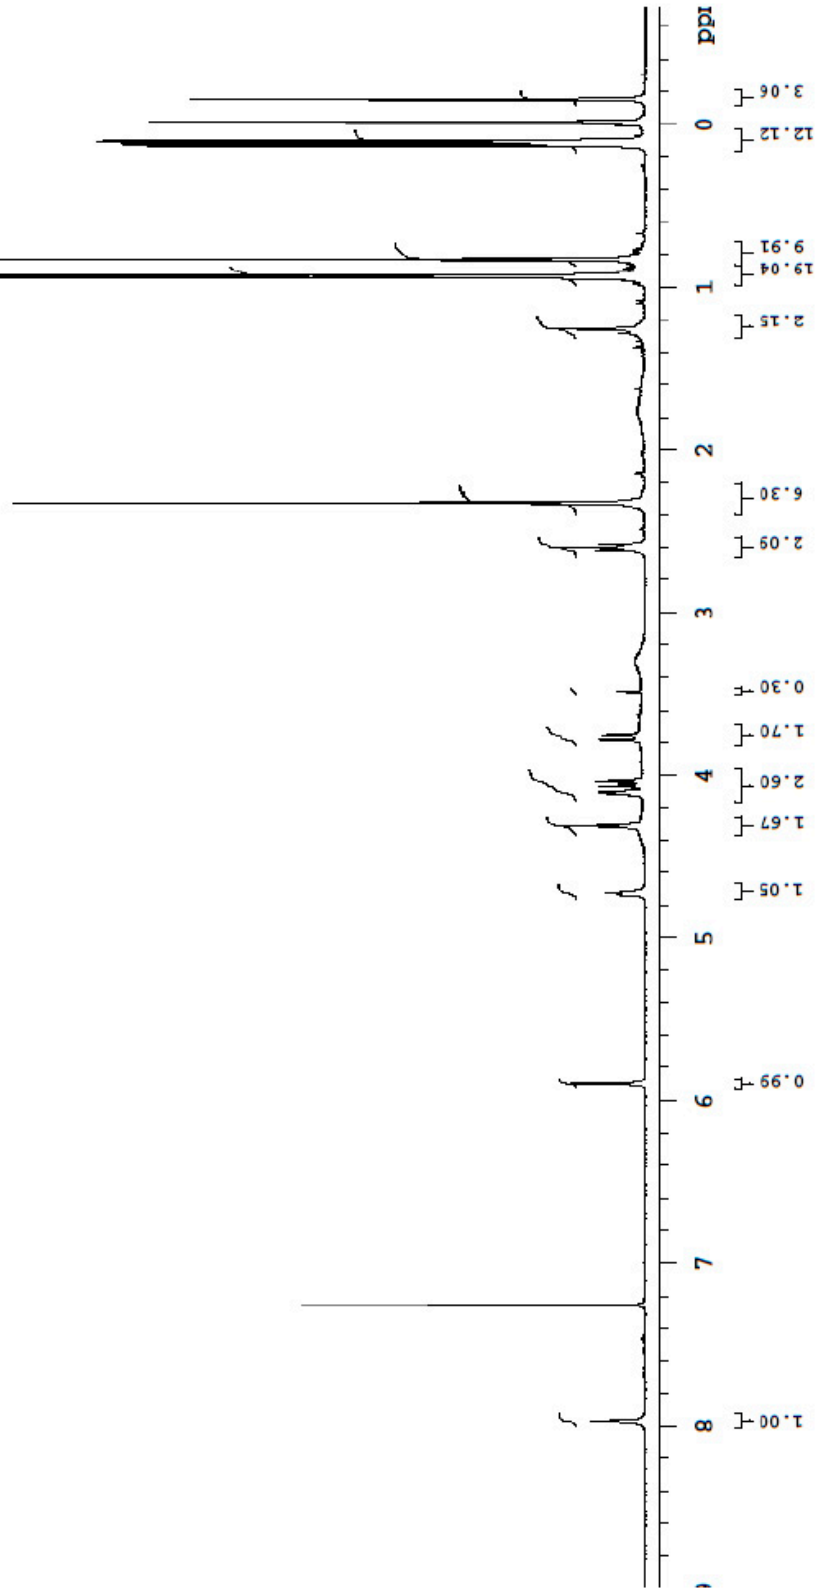

Sample Name :  
GVK-DD0-397-TME-T  
Solvent: cdcl3  
Date: Mar 29 2015  
400 VNMRS/NRM-1/NMR-002

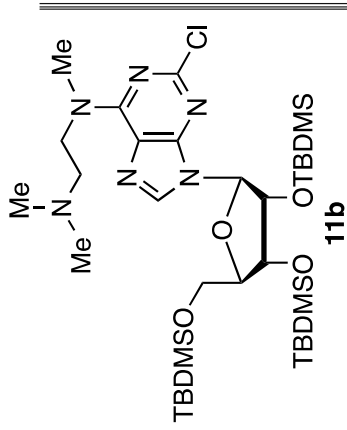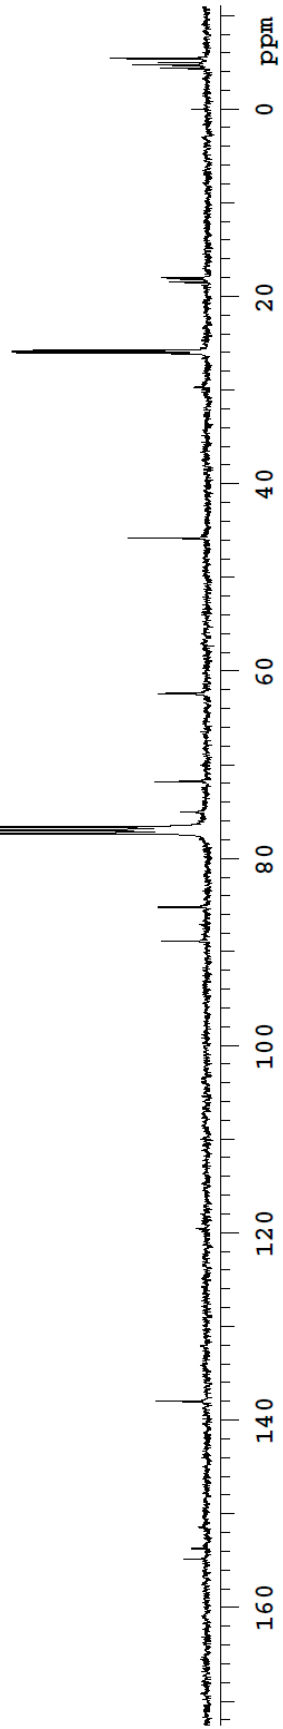

Plotname: 021503D2561\_CARBON\_01\_plot01

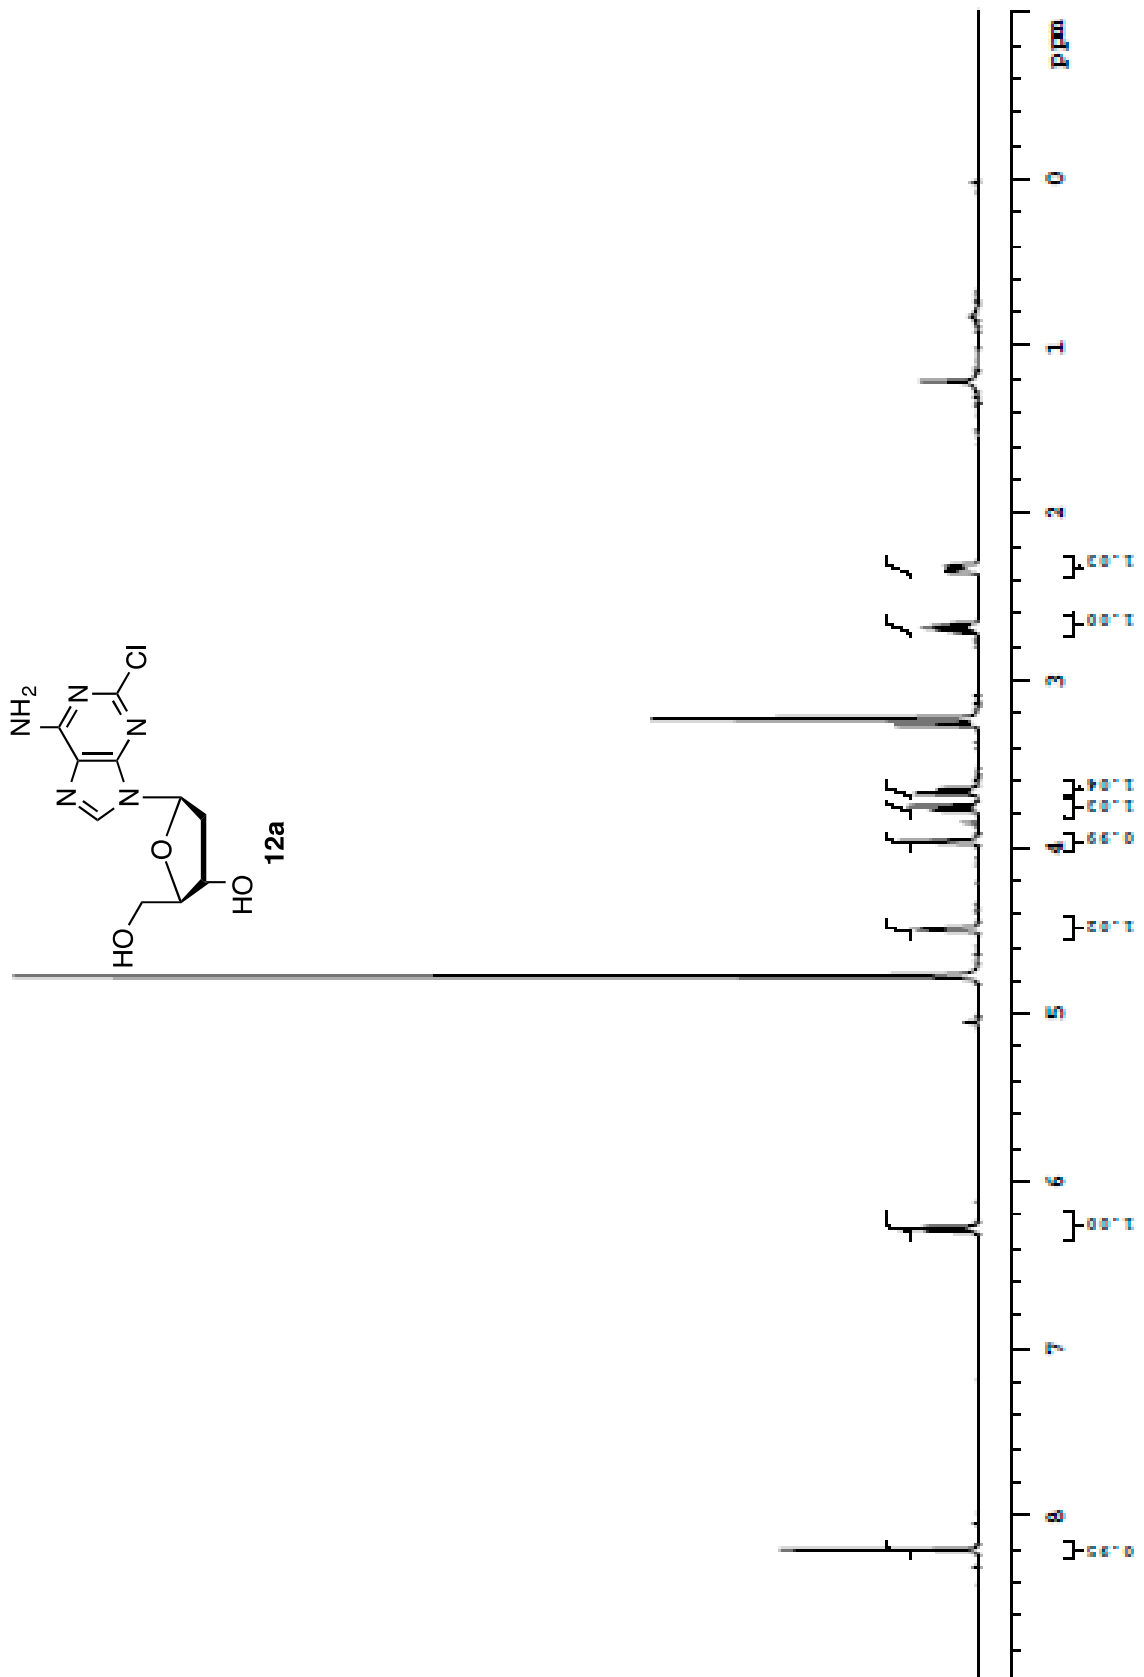

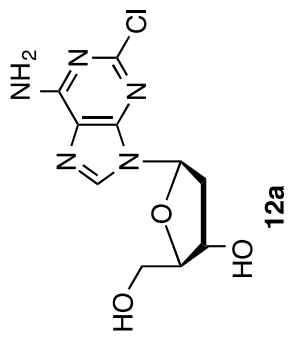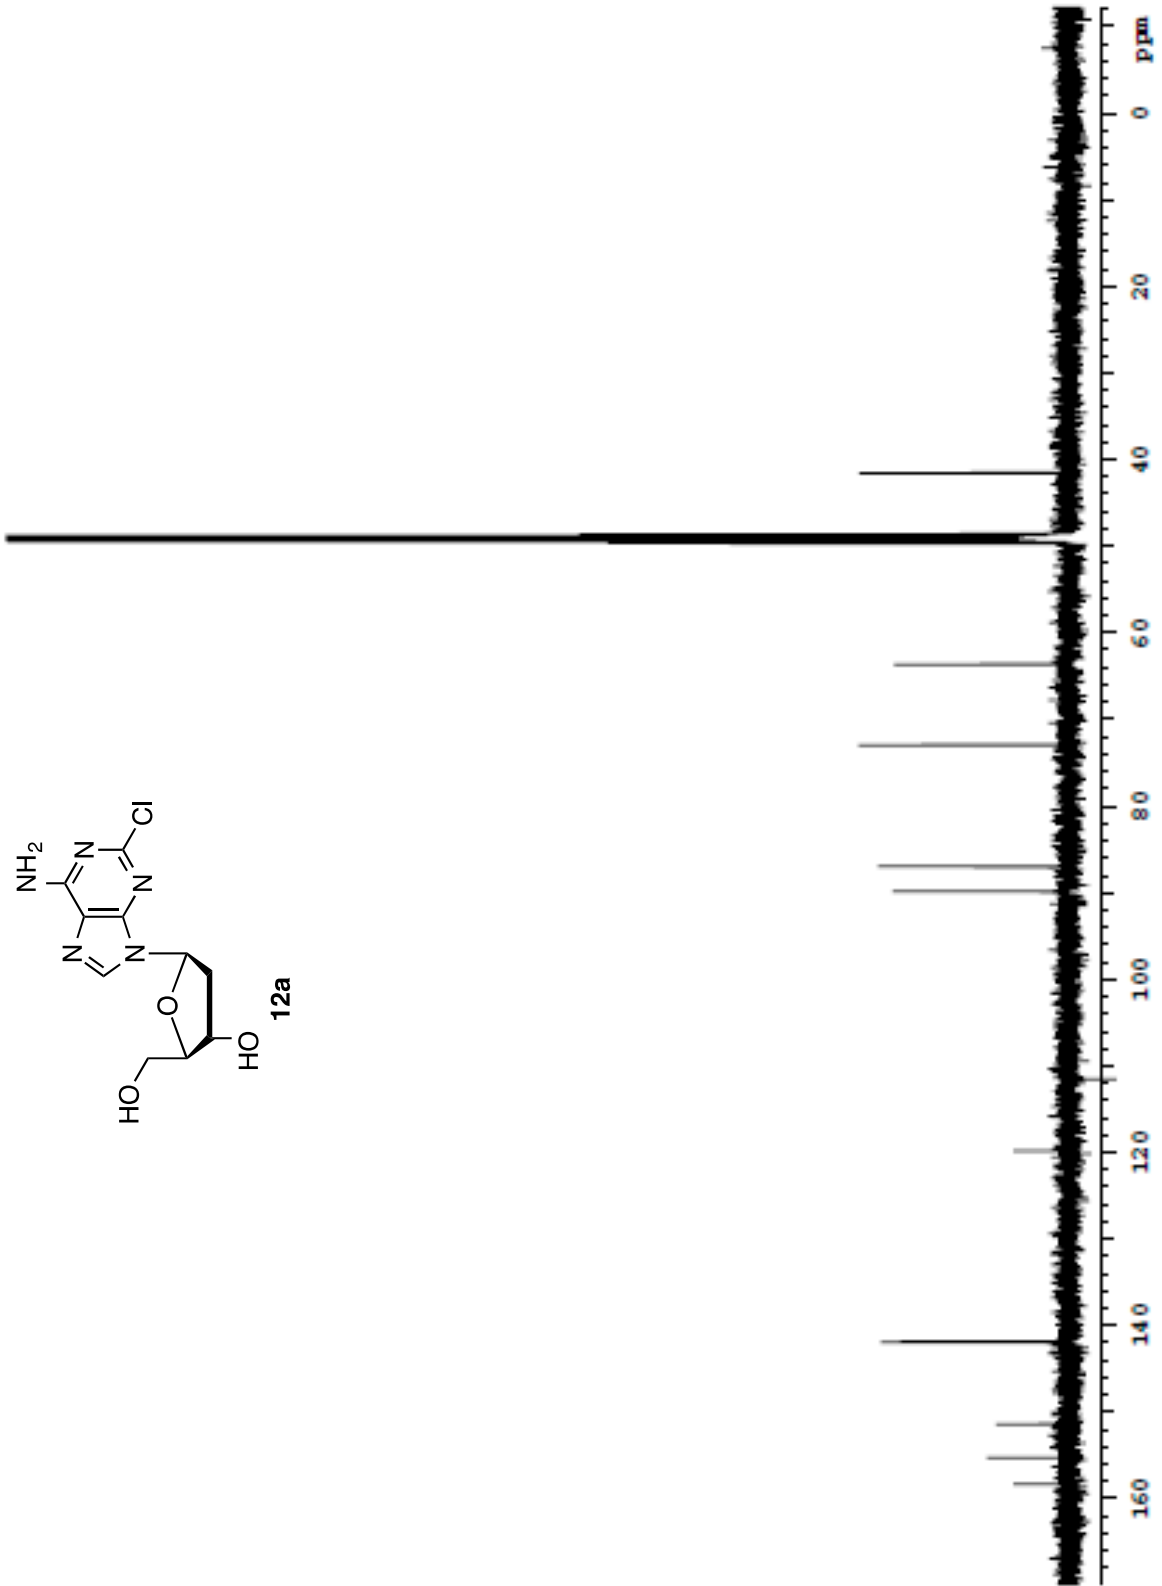

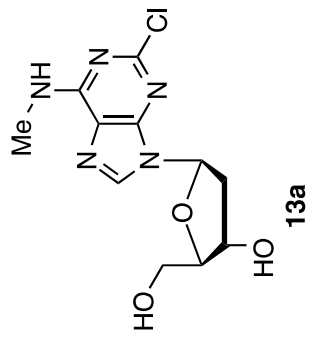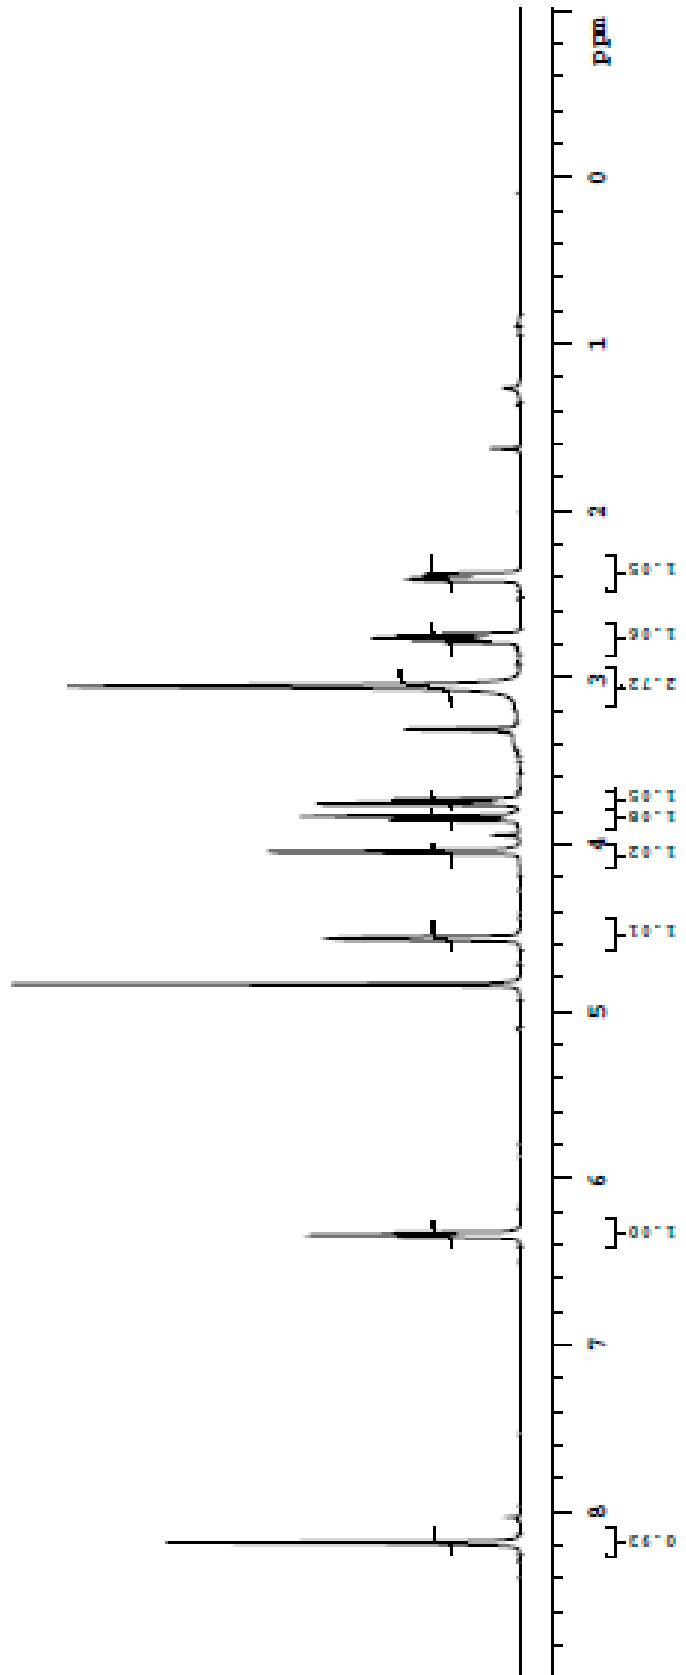

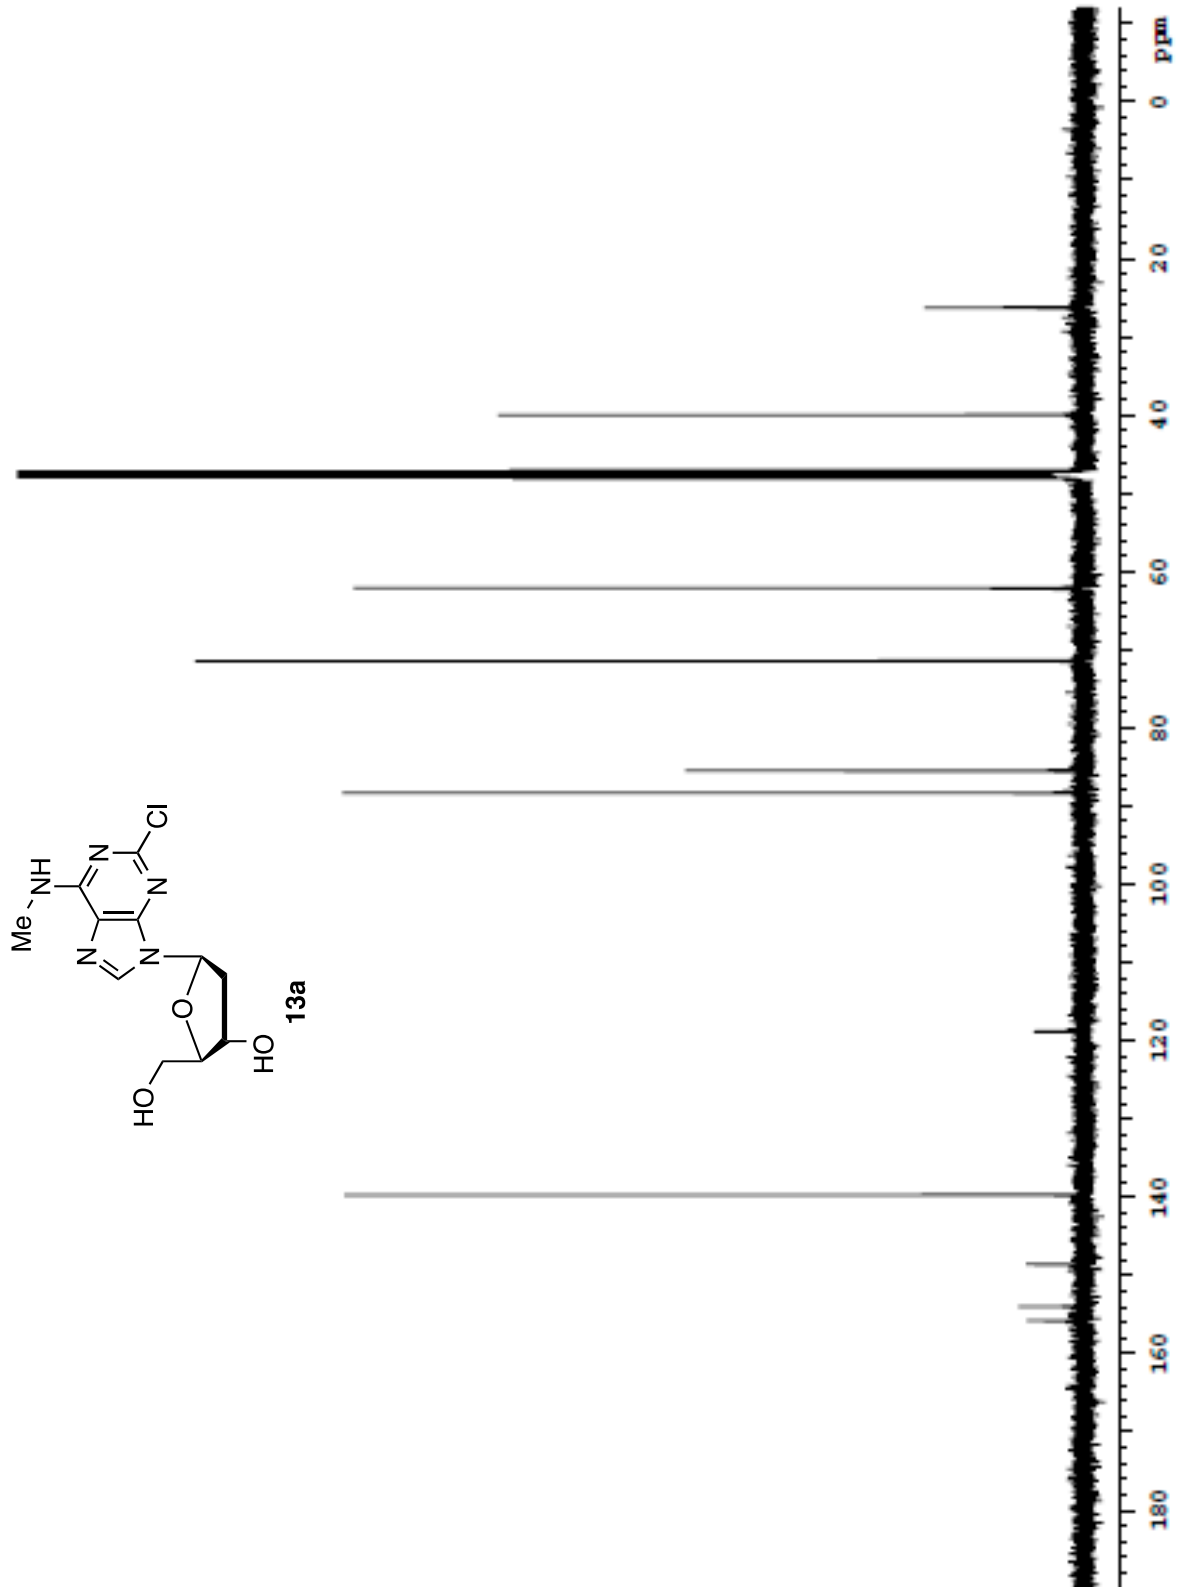

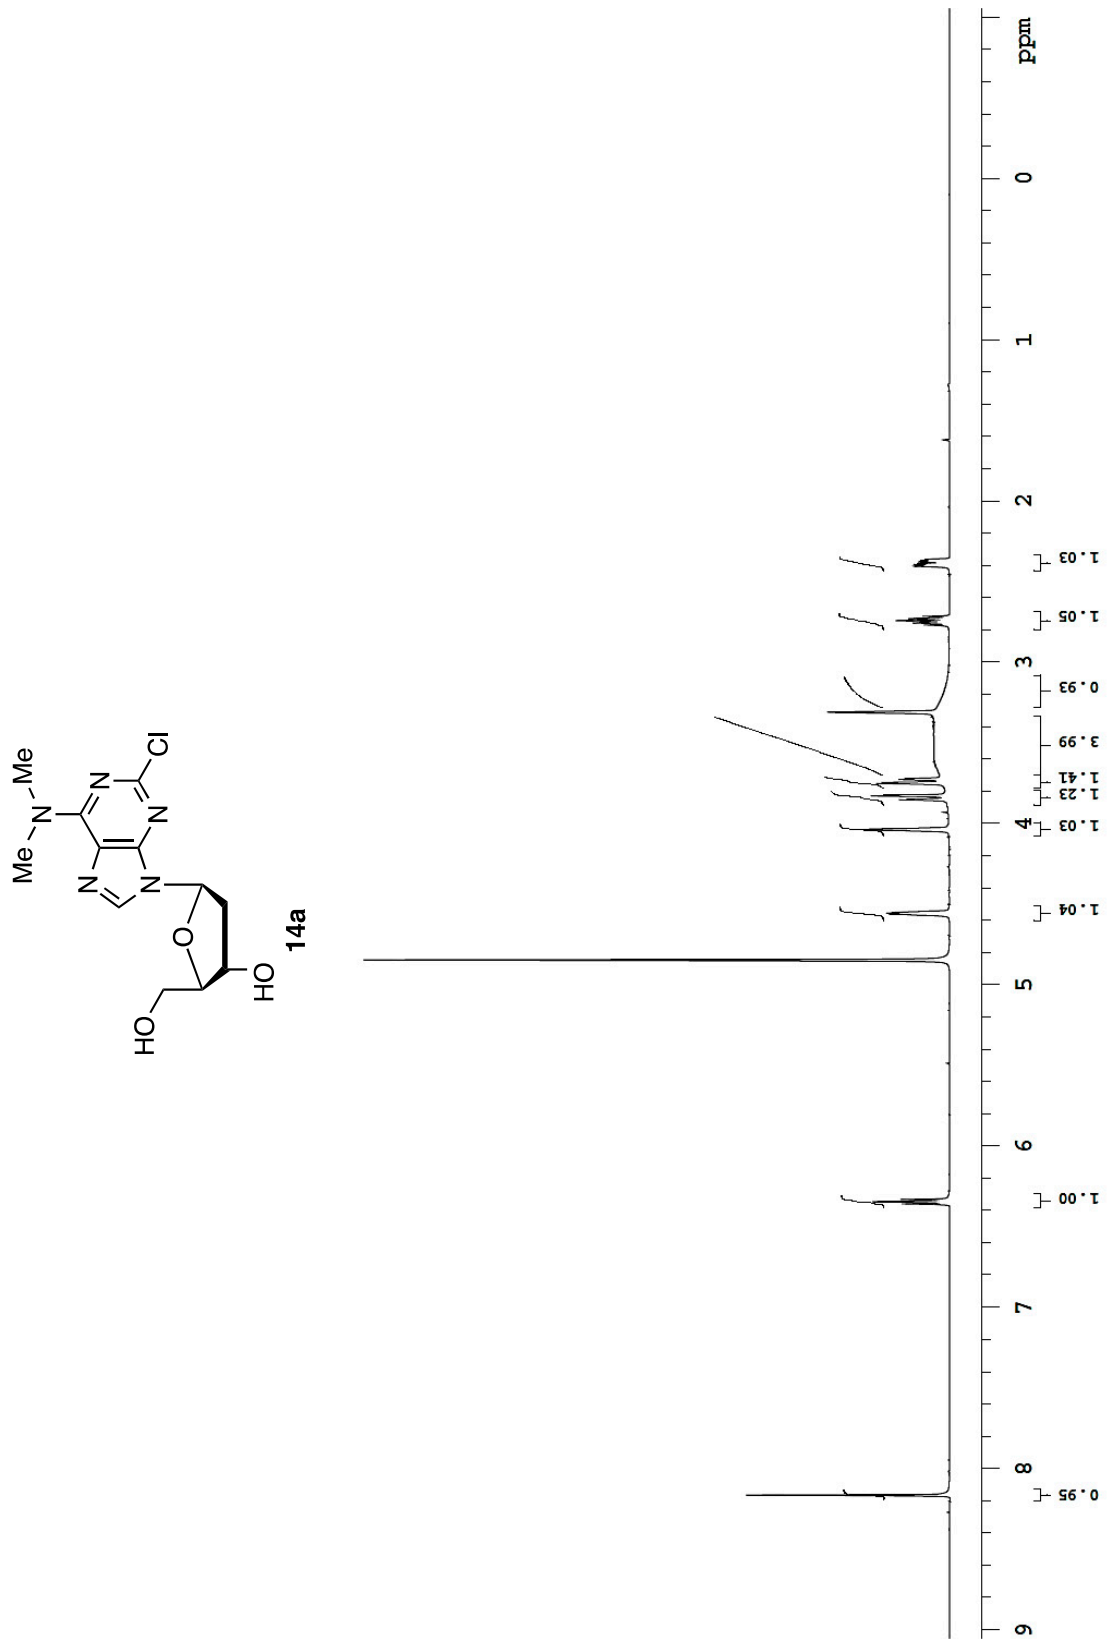

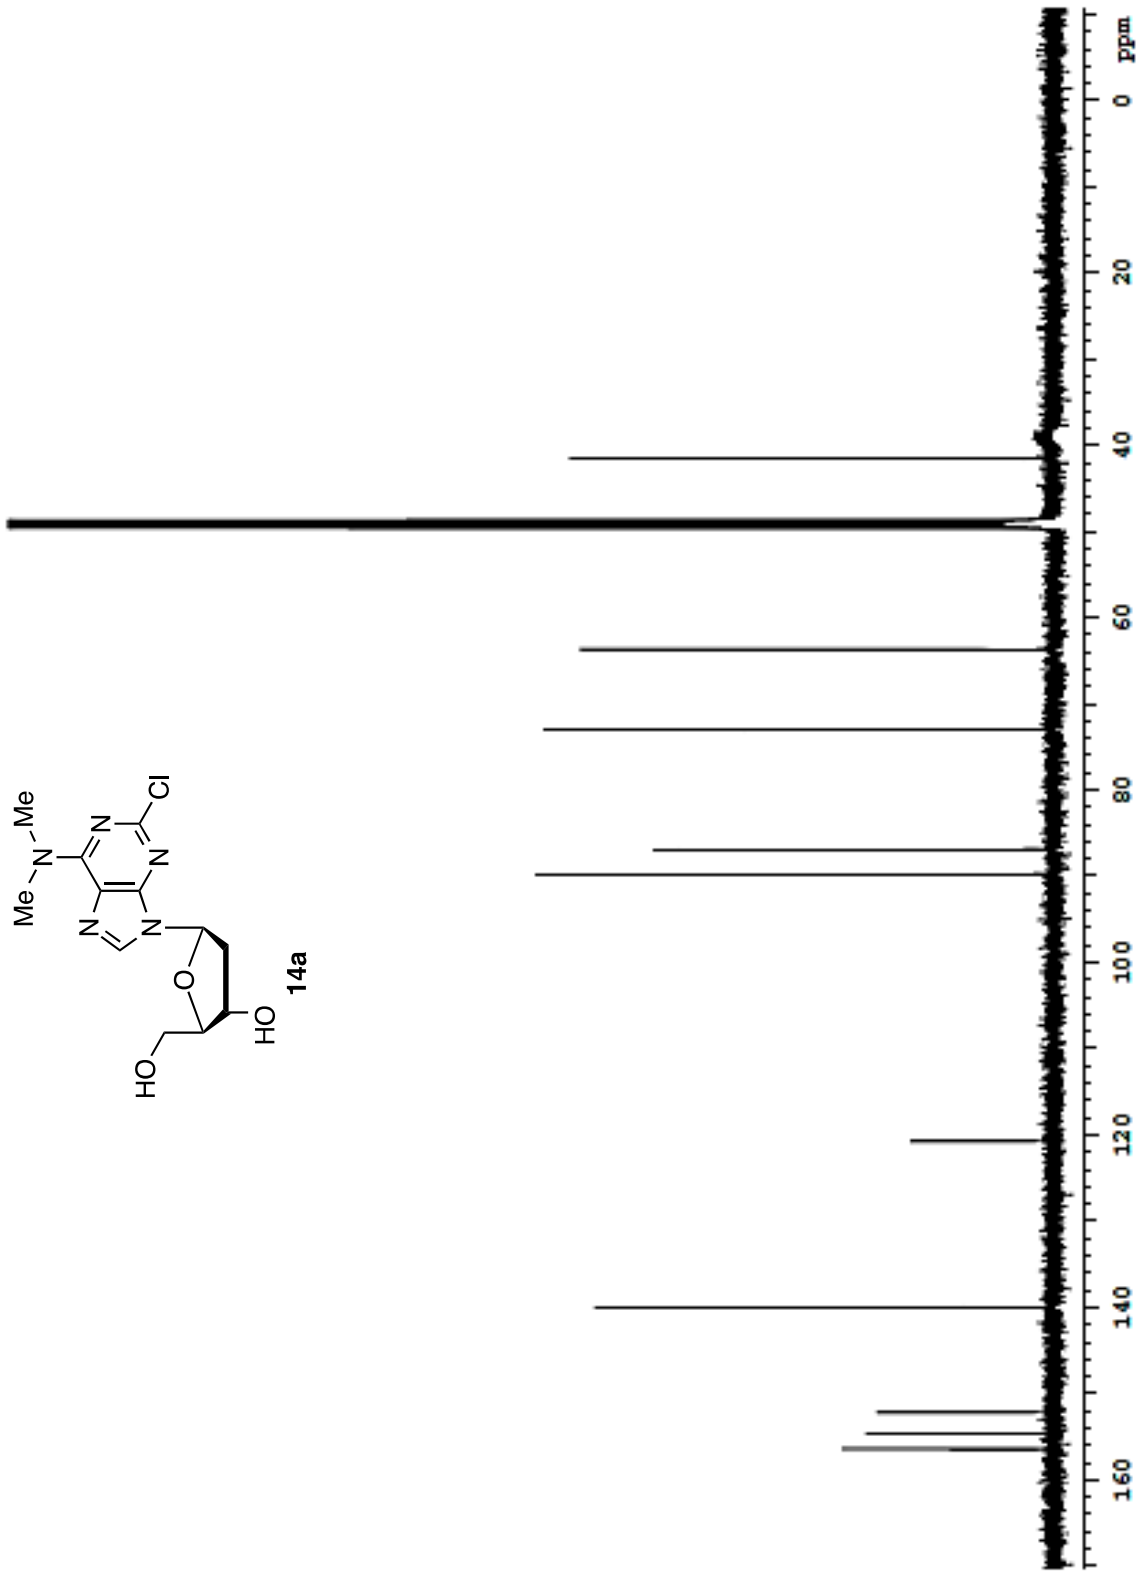



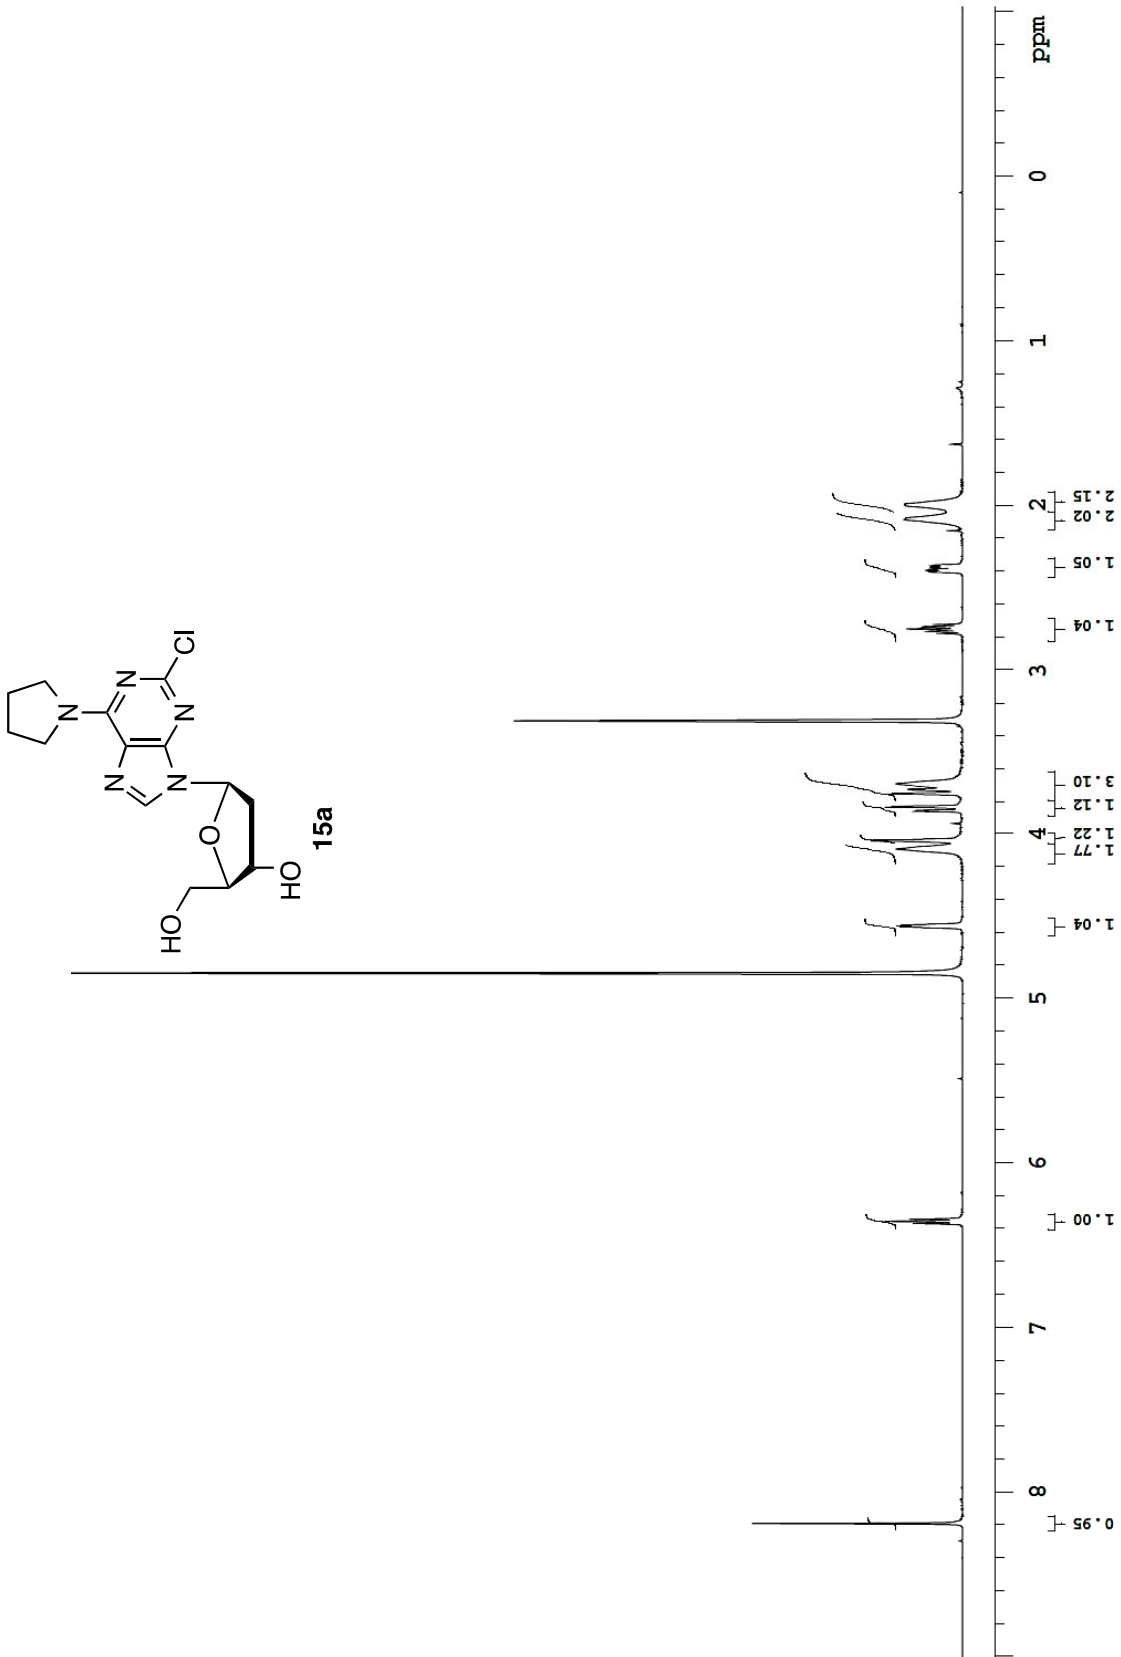

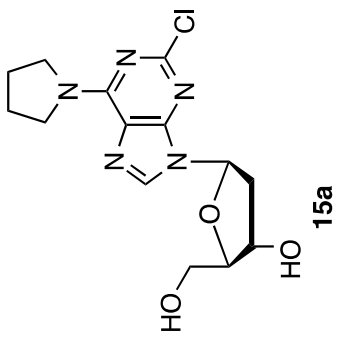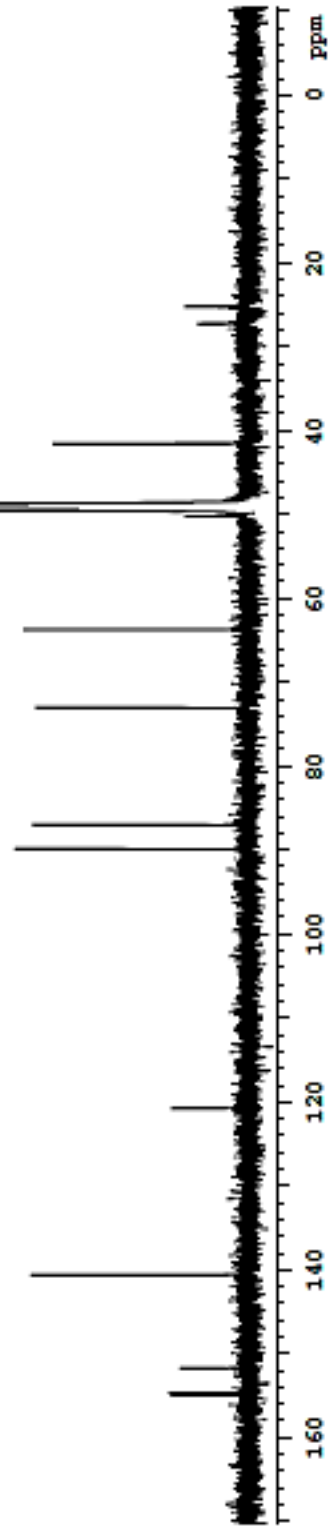

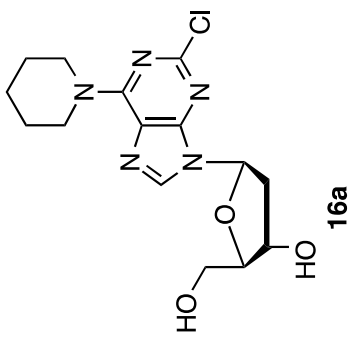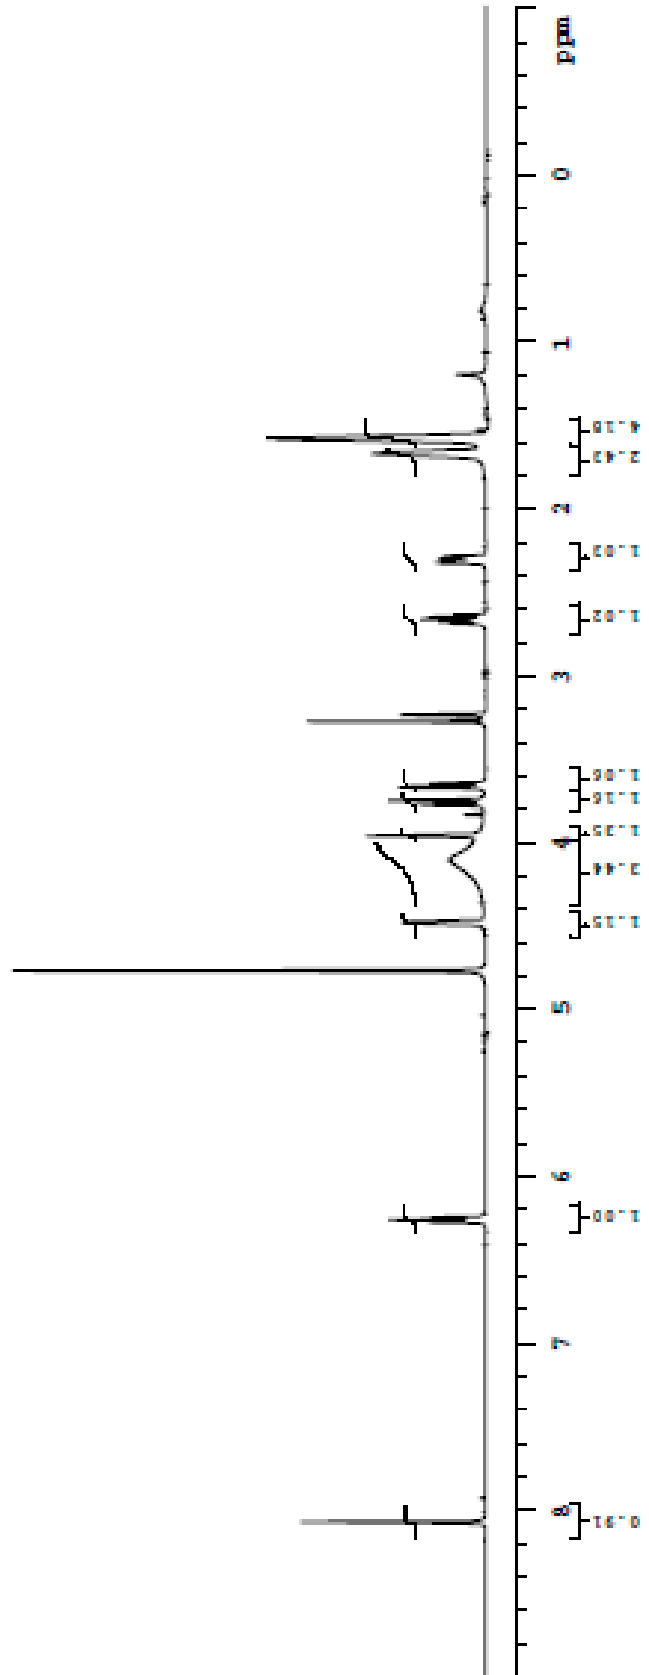

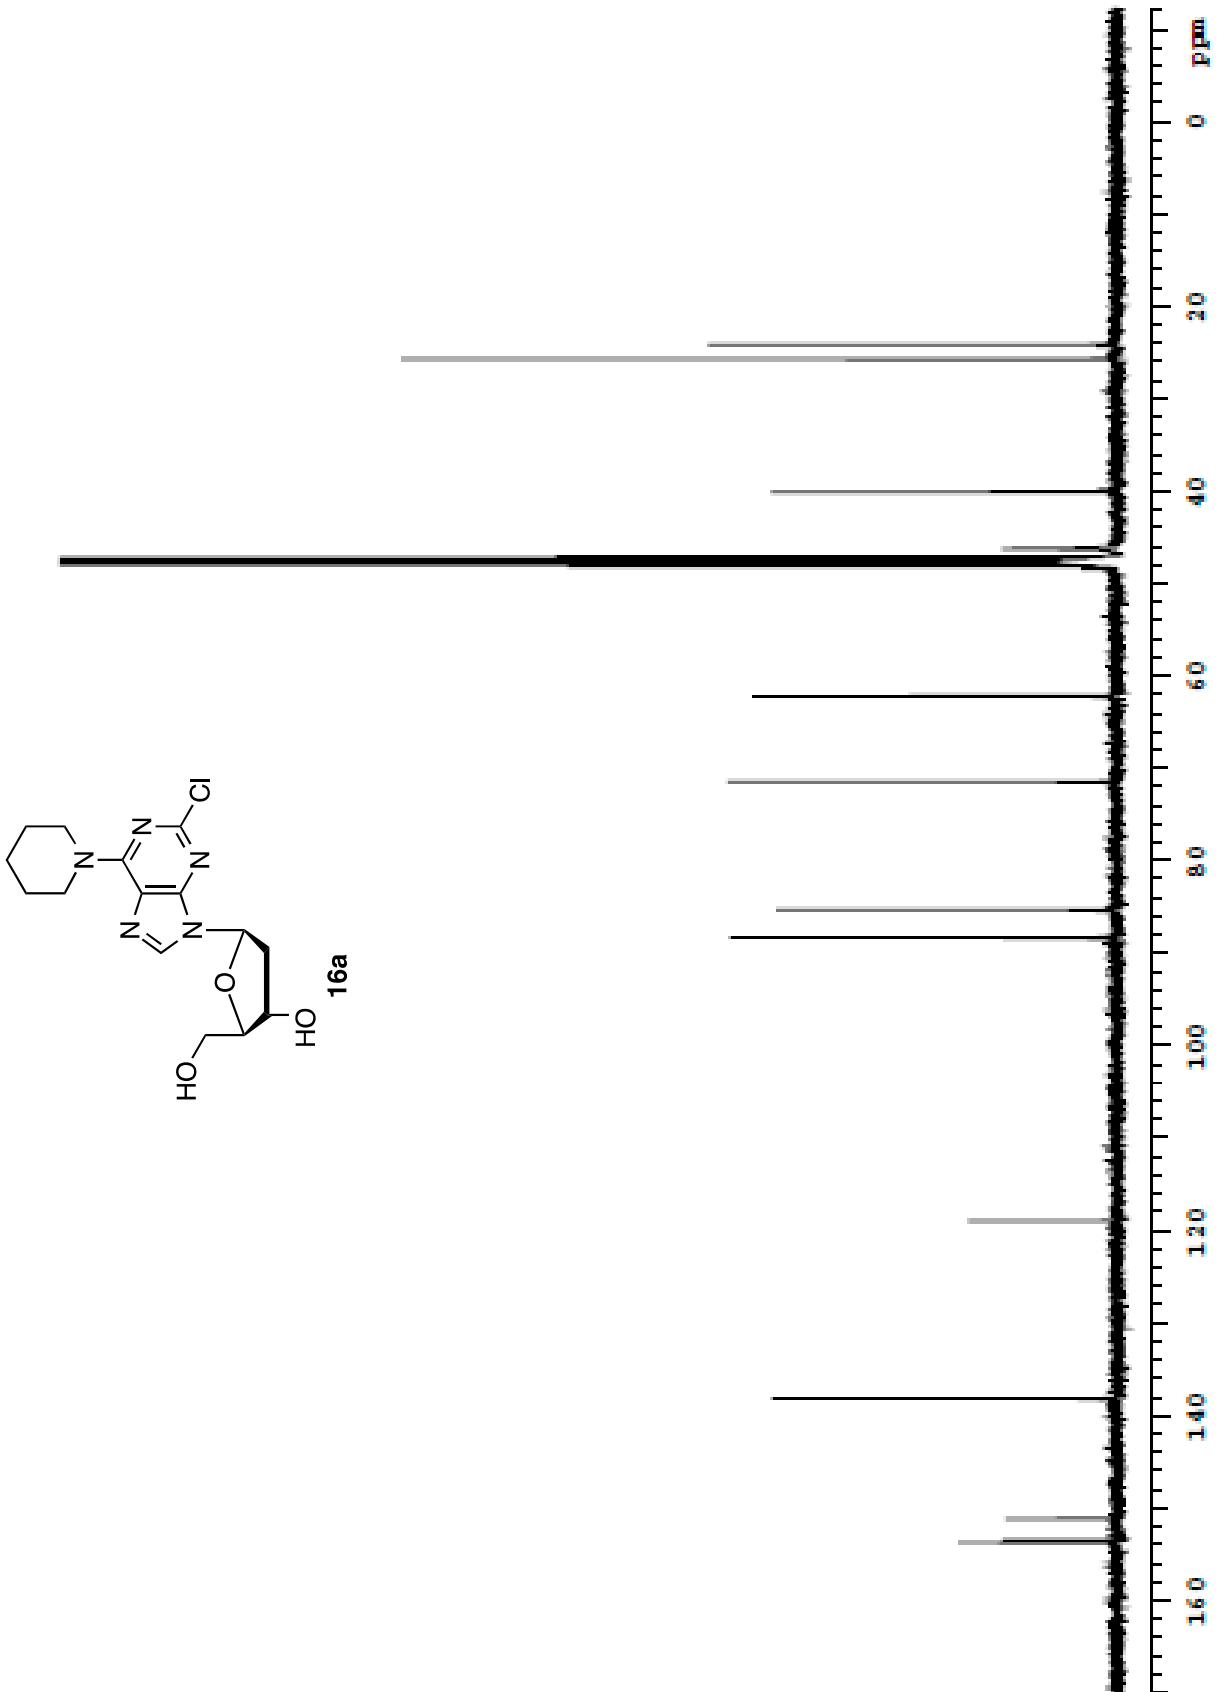

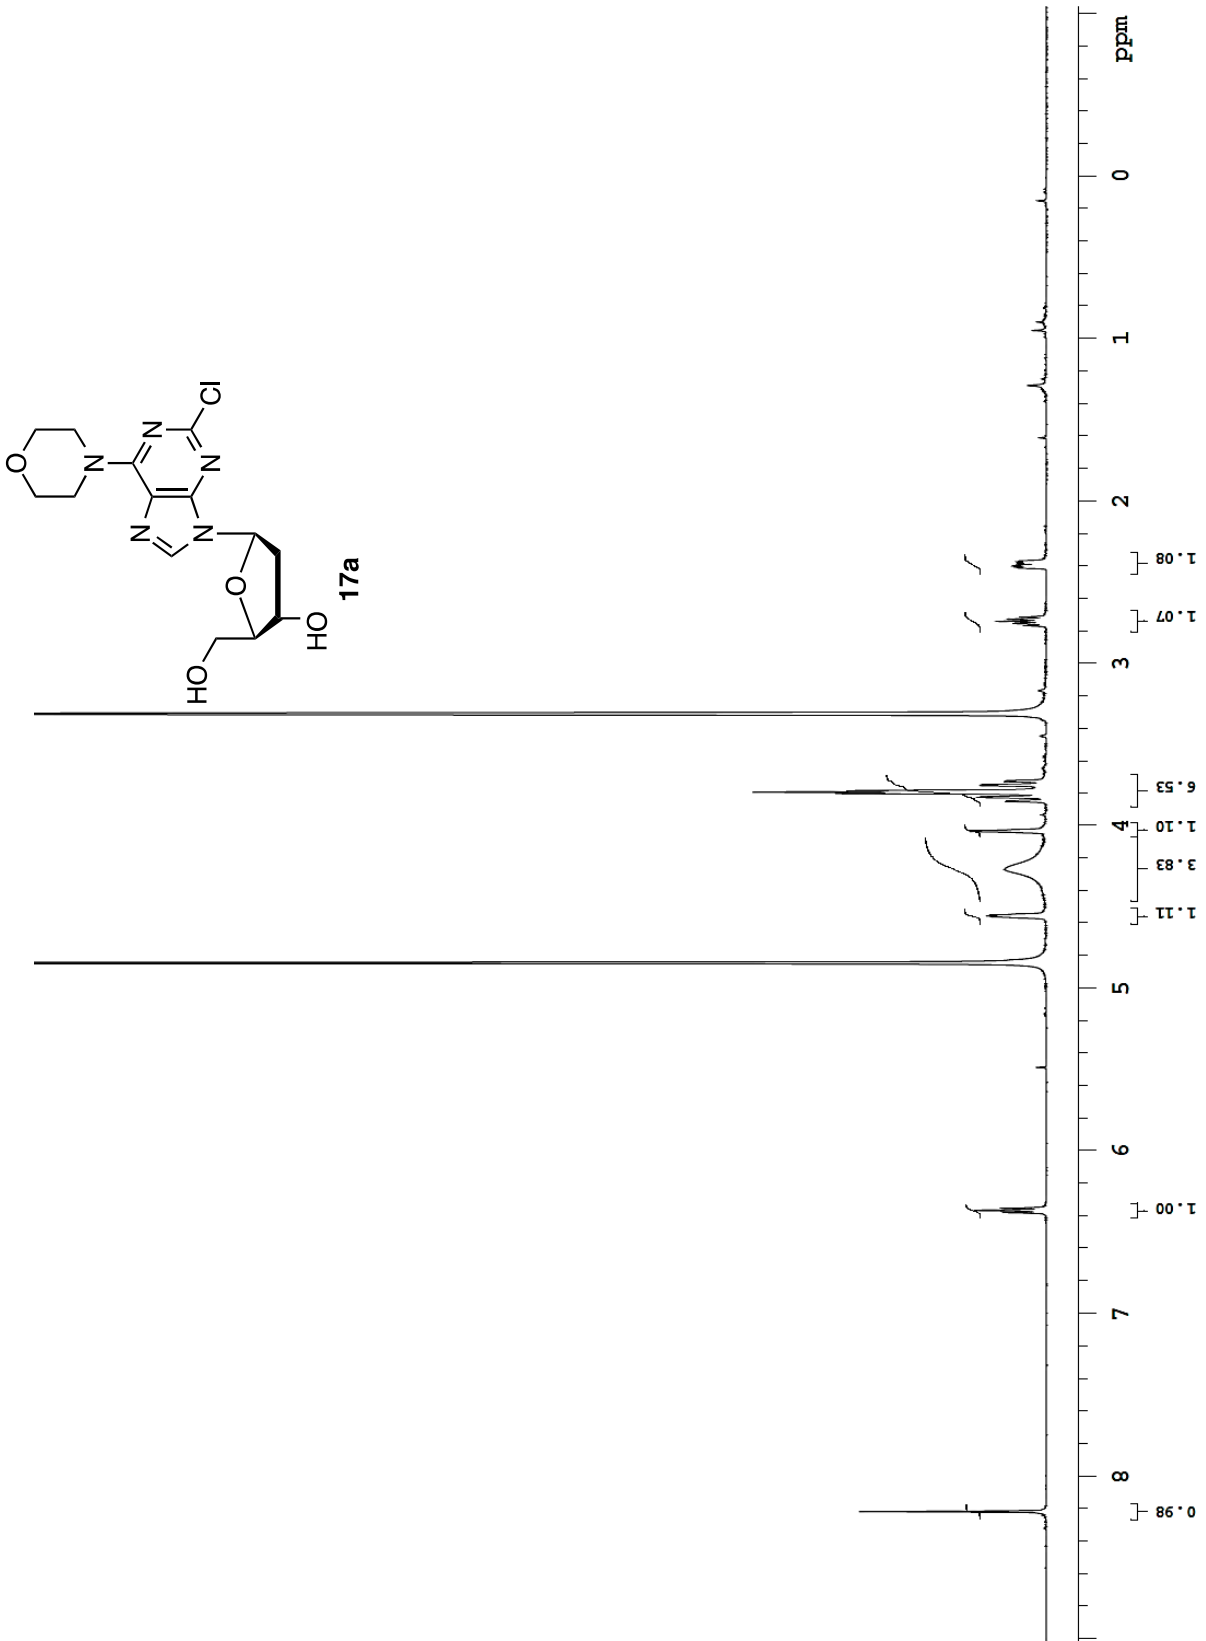

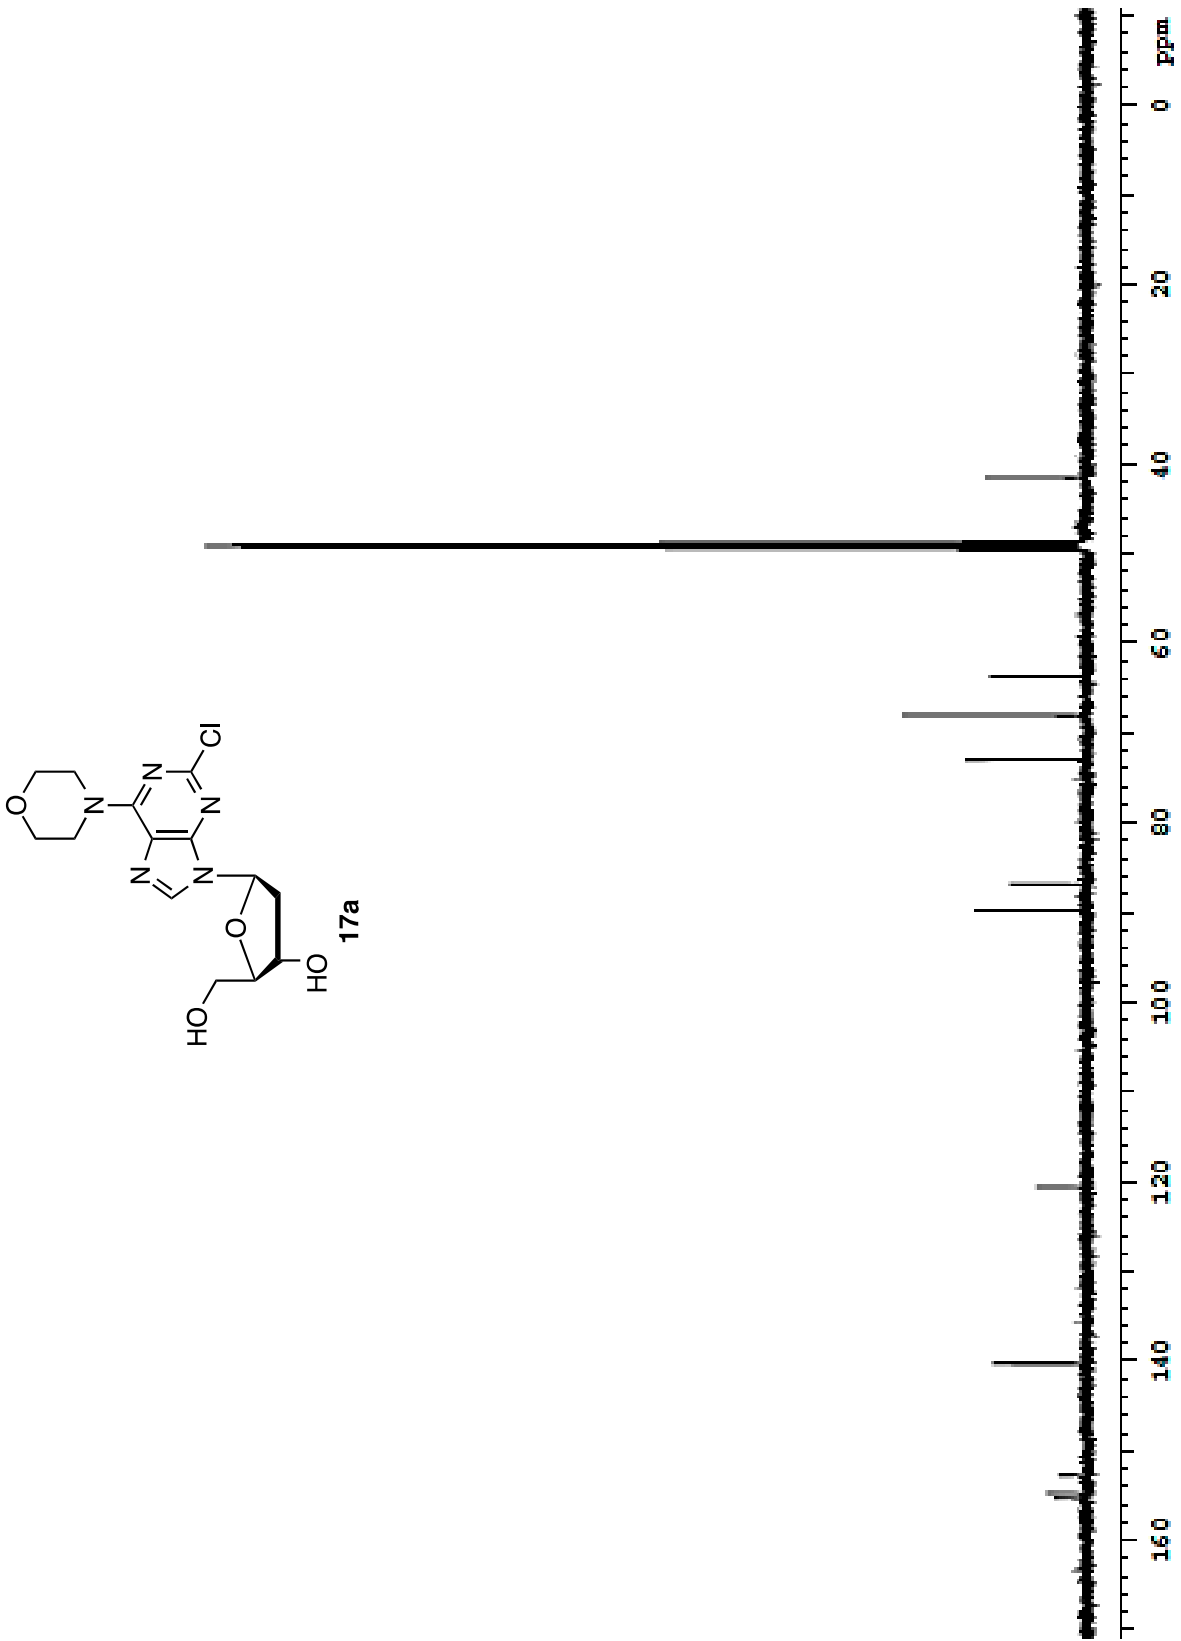

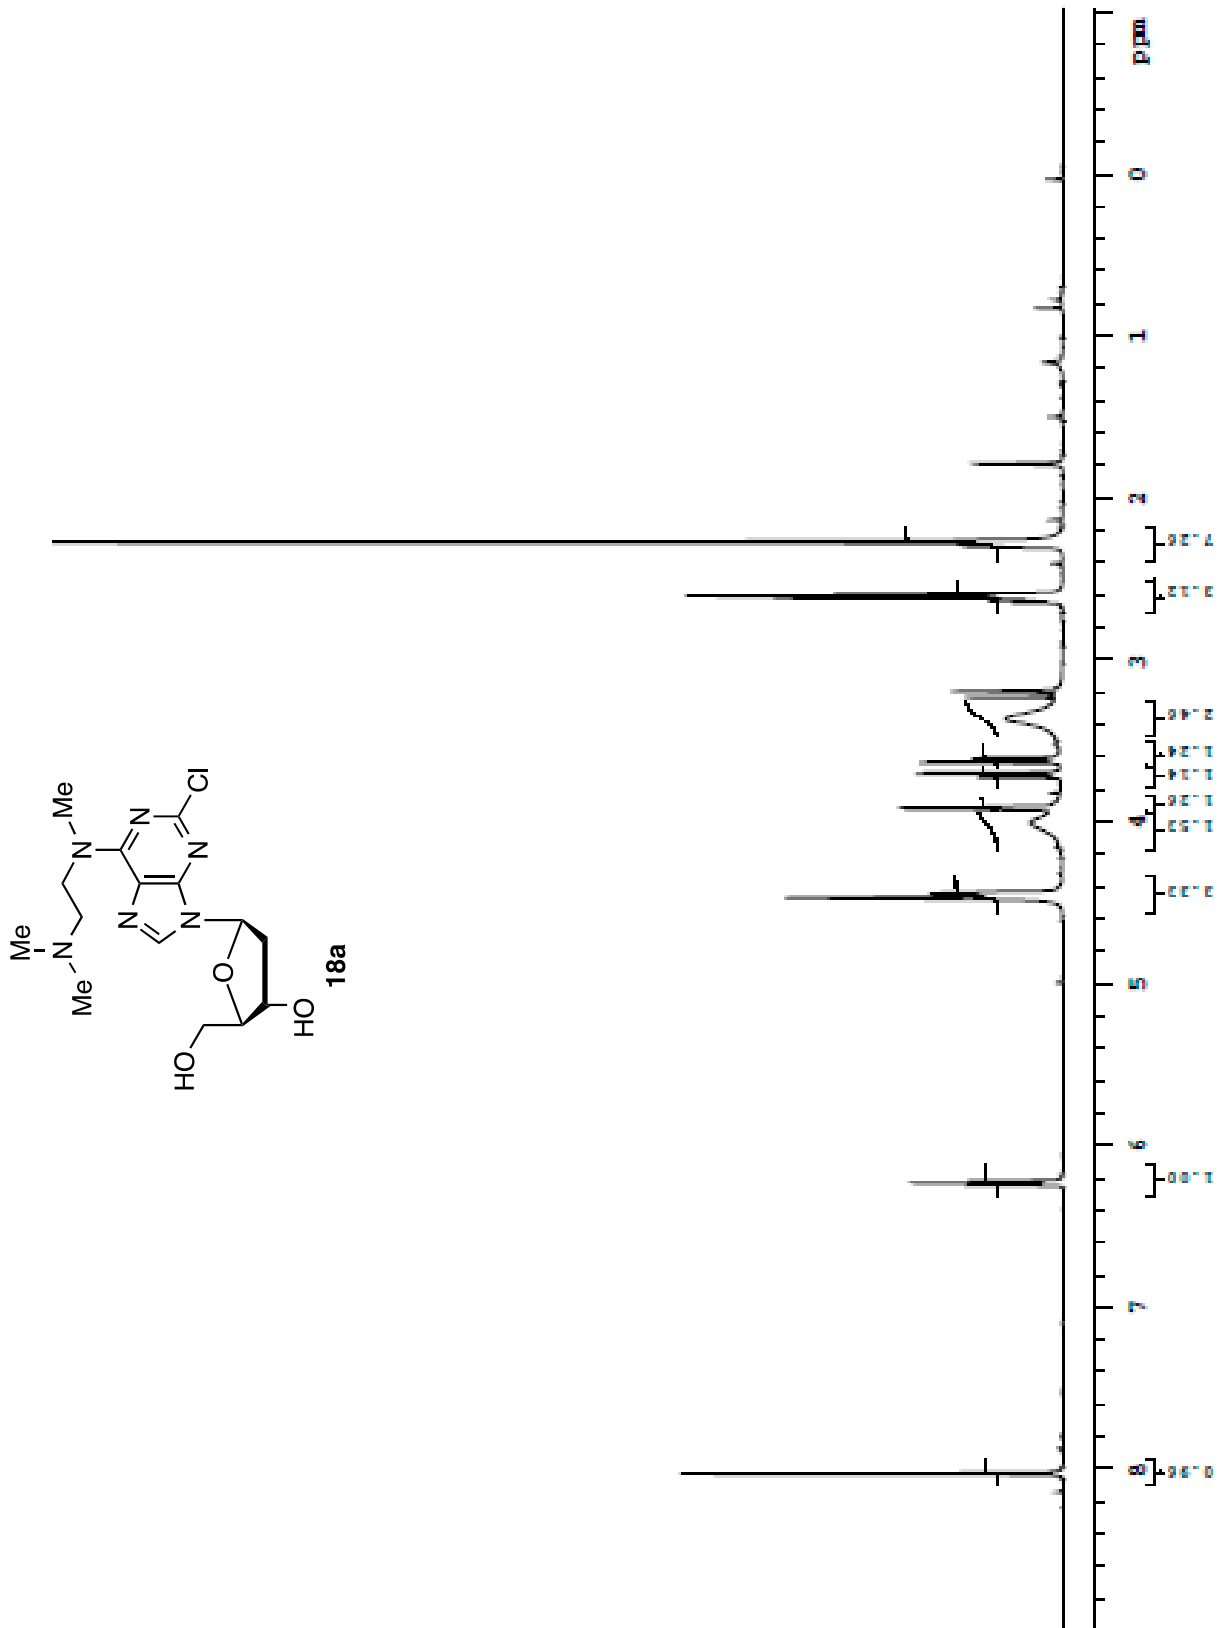

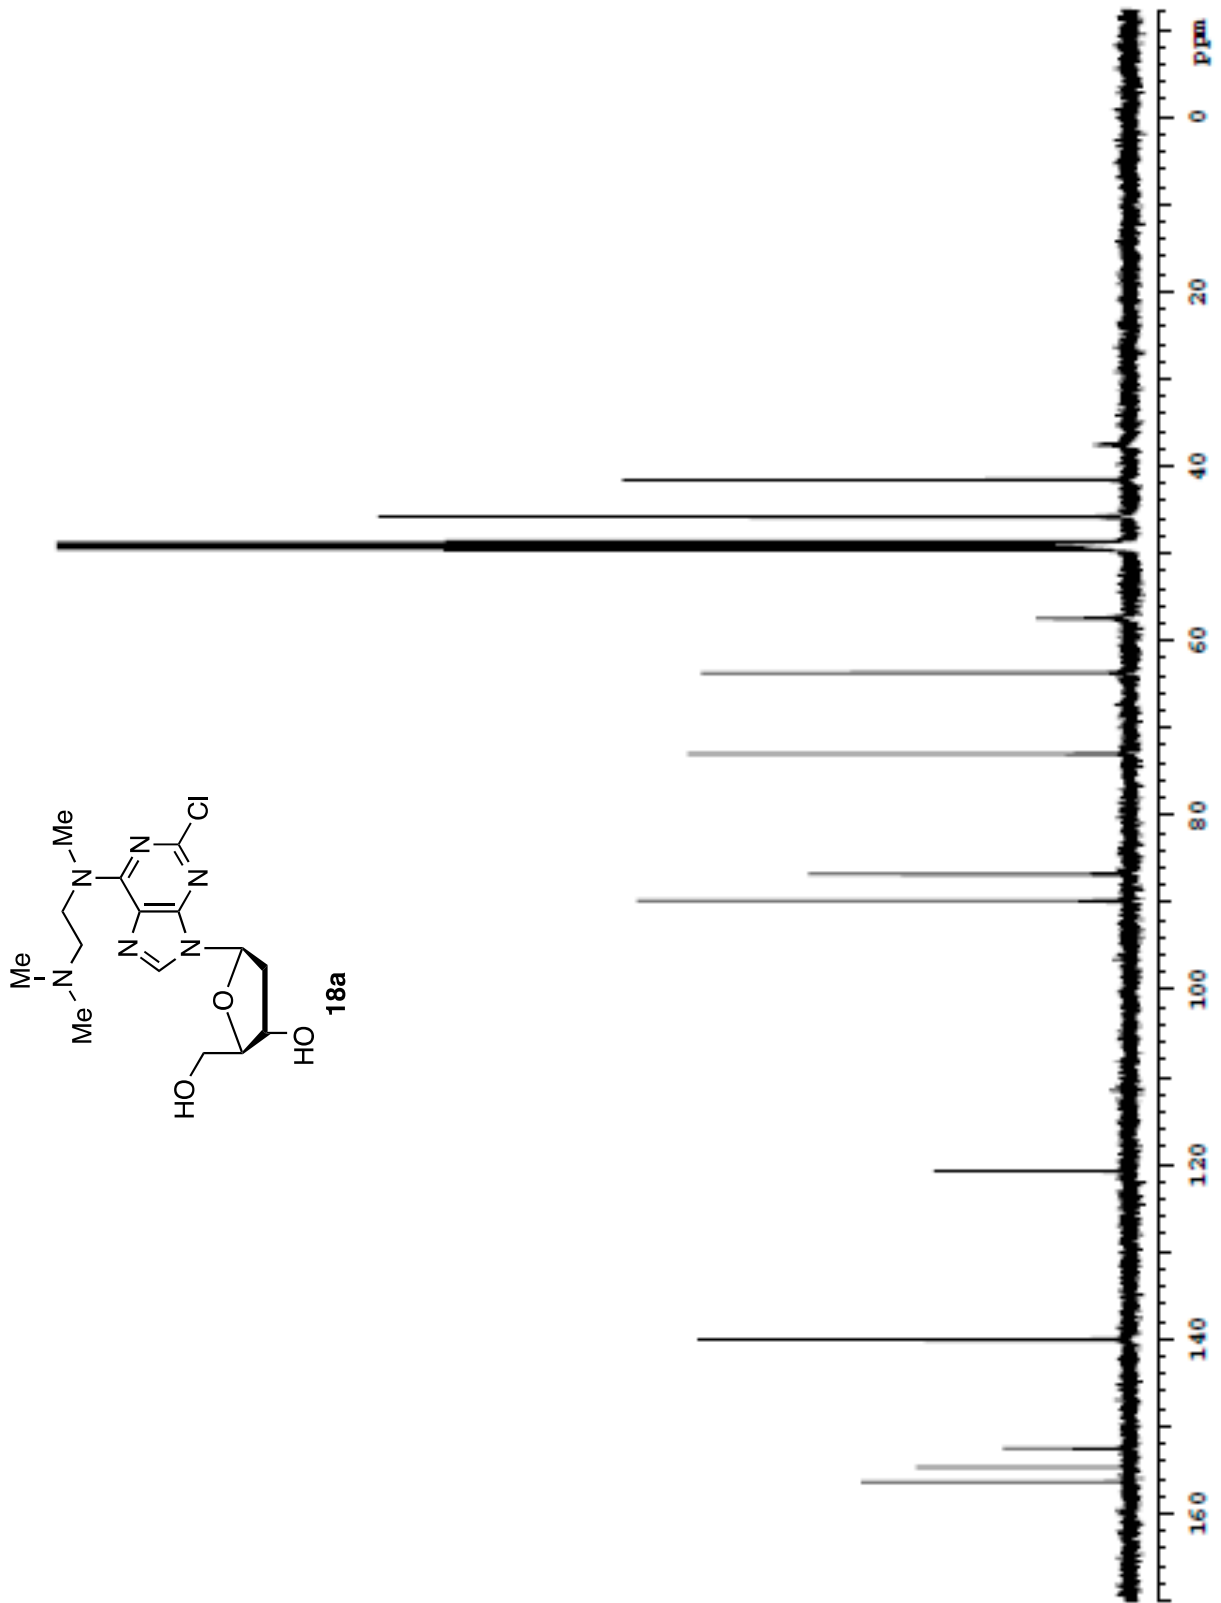



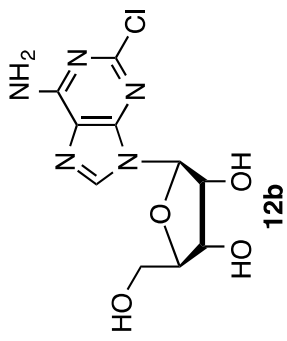

Sample Name :  
GVK-DD0397-AMM-F  
Solvent: cd3od  
400-MR/NMR-1/NMR-001  
Date: Apr 2 2015

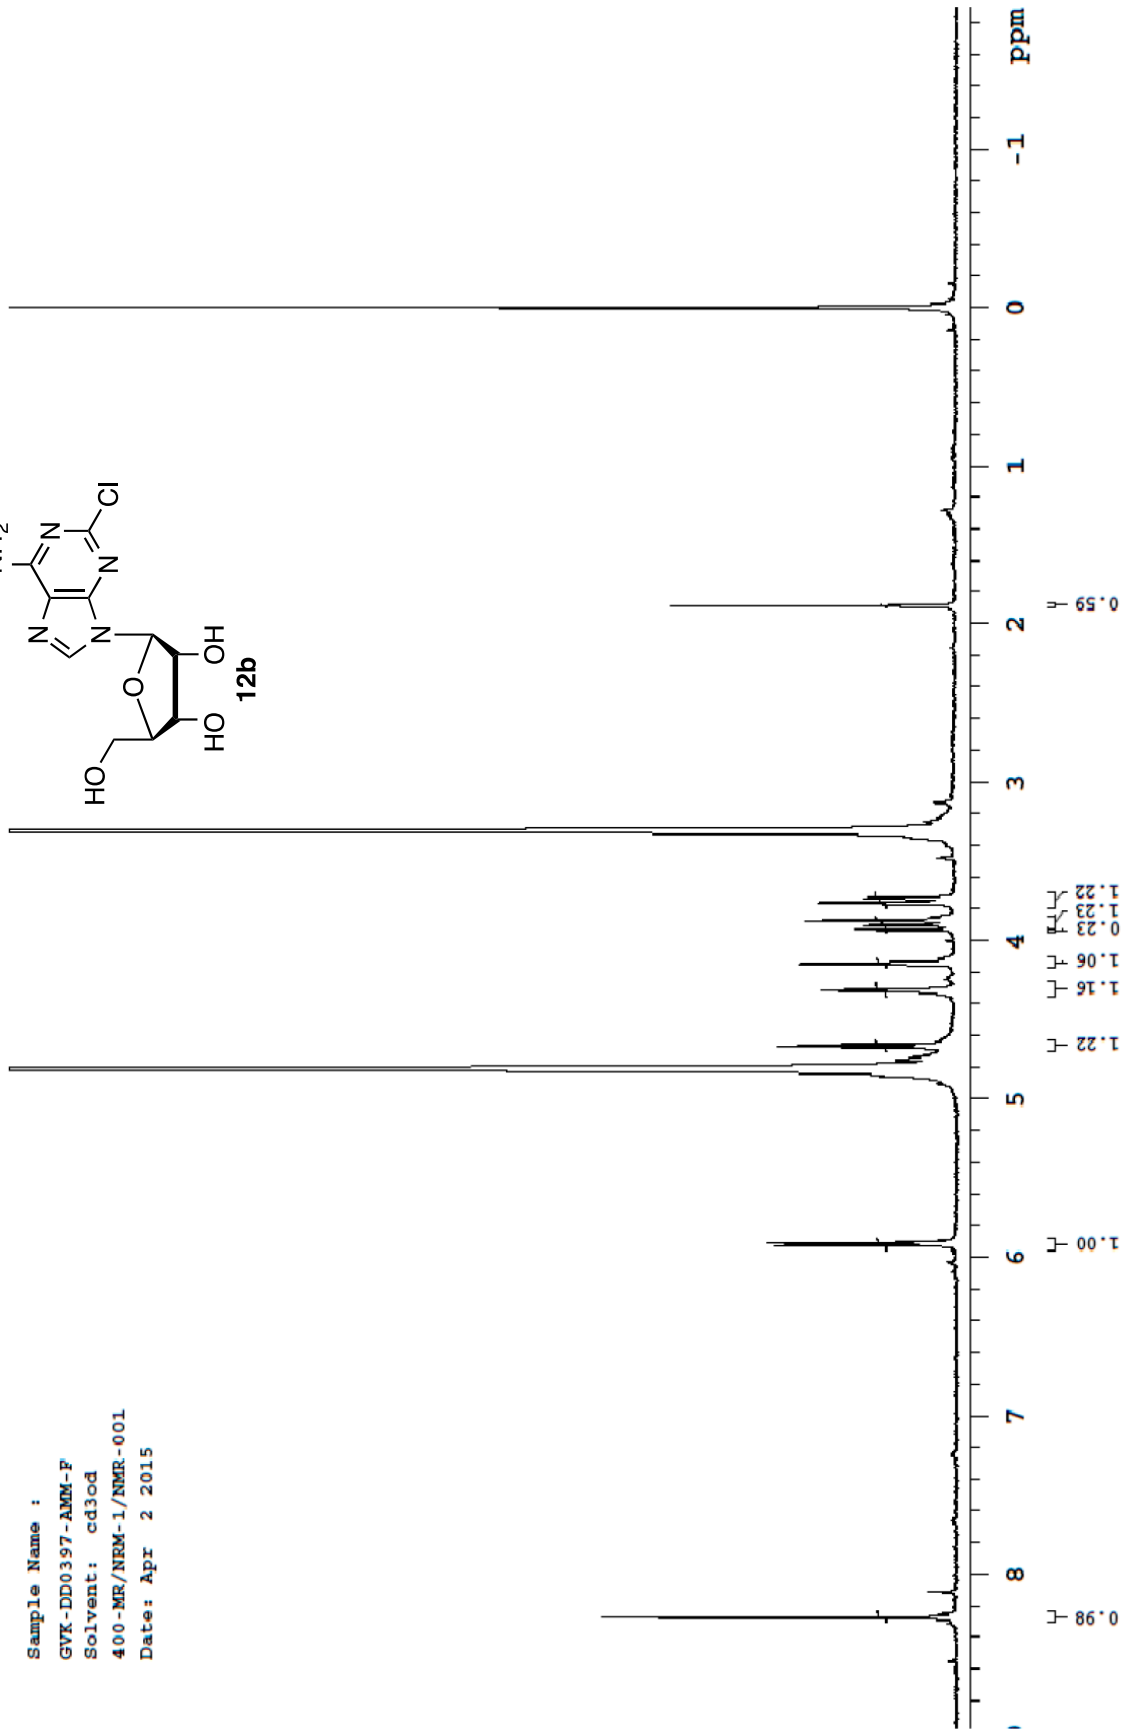

GVK-DD0397-Amm-F sol problem  
Reference Code: 021504B2827  
Solvent: dmso  
Archive directory:  
/home/gvkbio/data/2015/Apr  
Agilent 400-MRDD2  
Data collected on: Apr 11 2015  
Experiment: CARBON

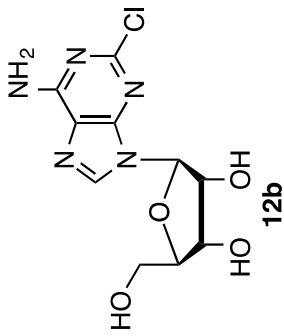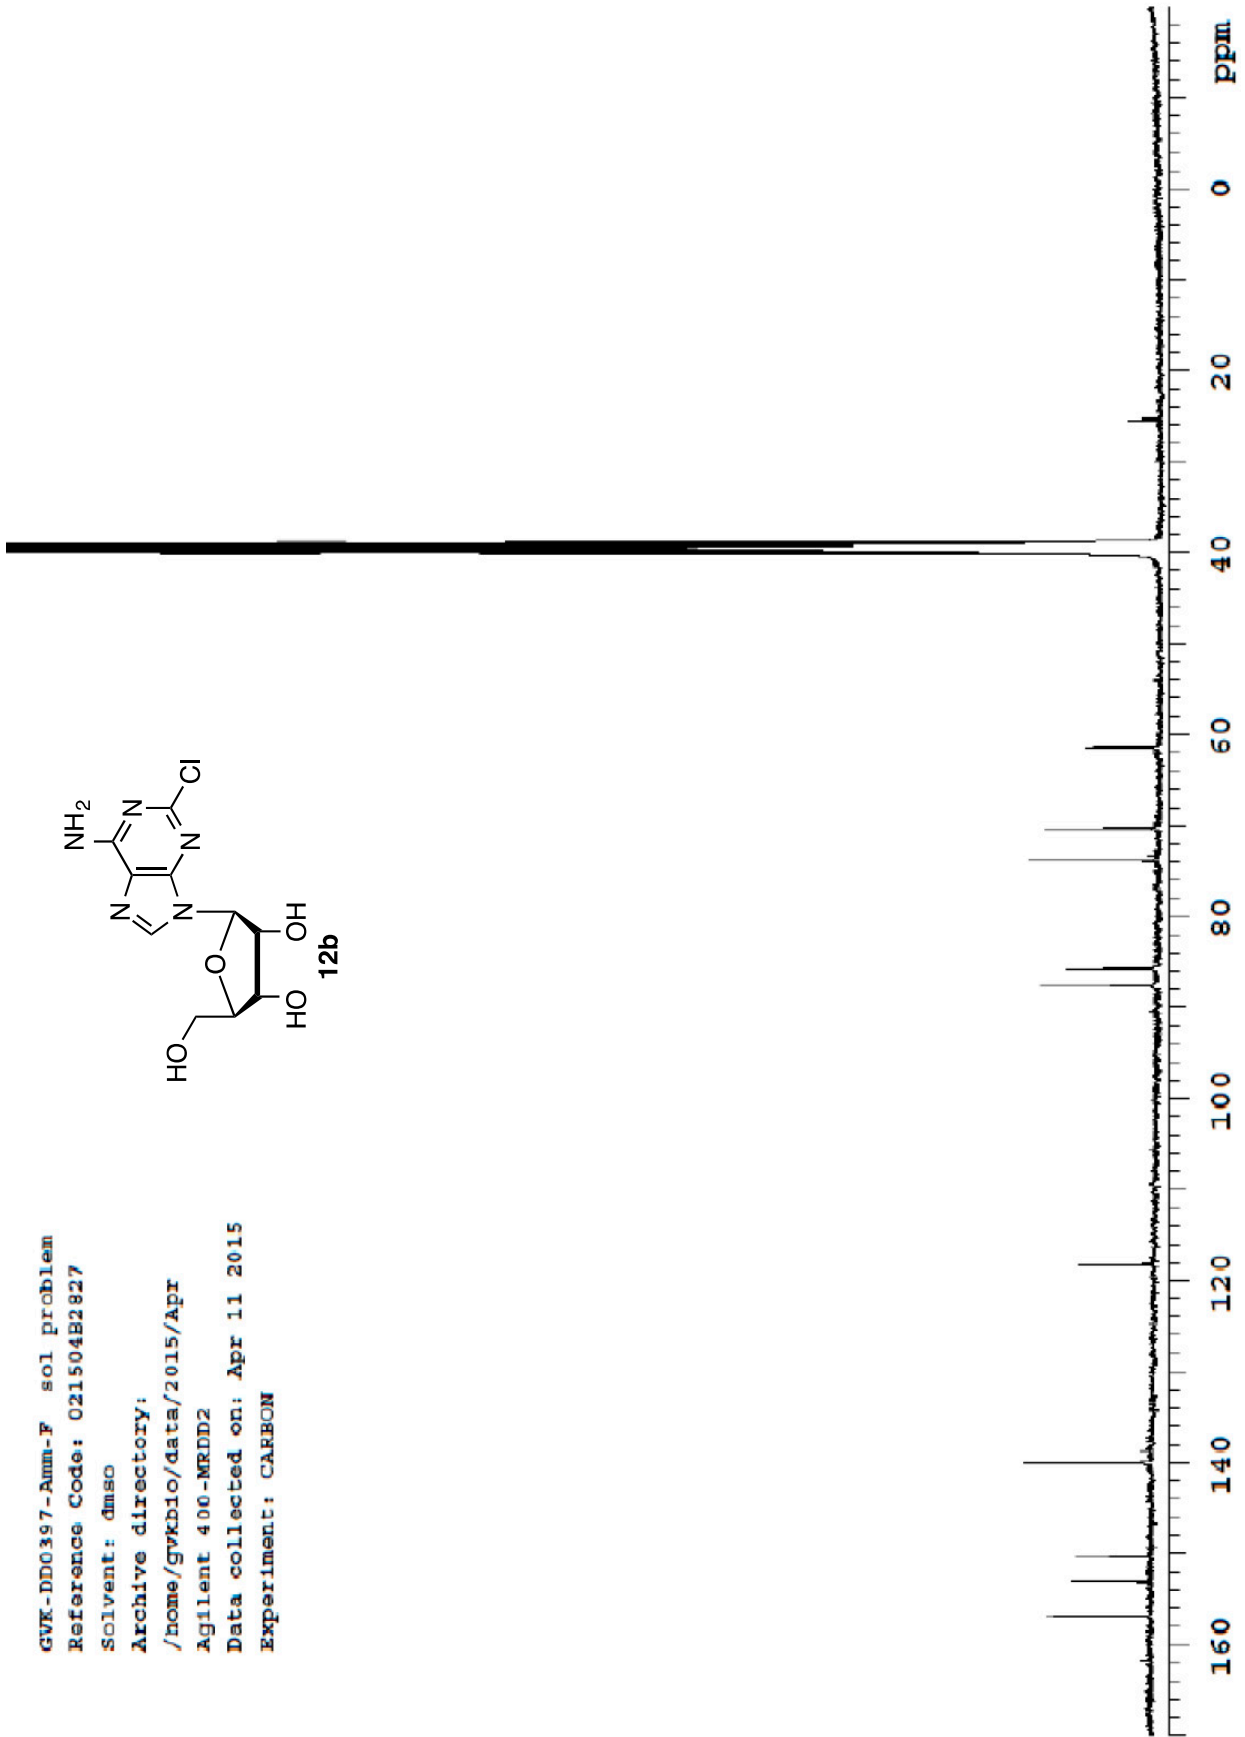

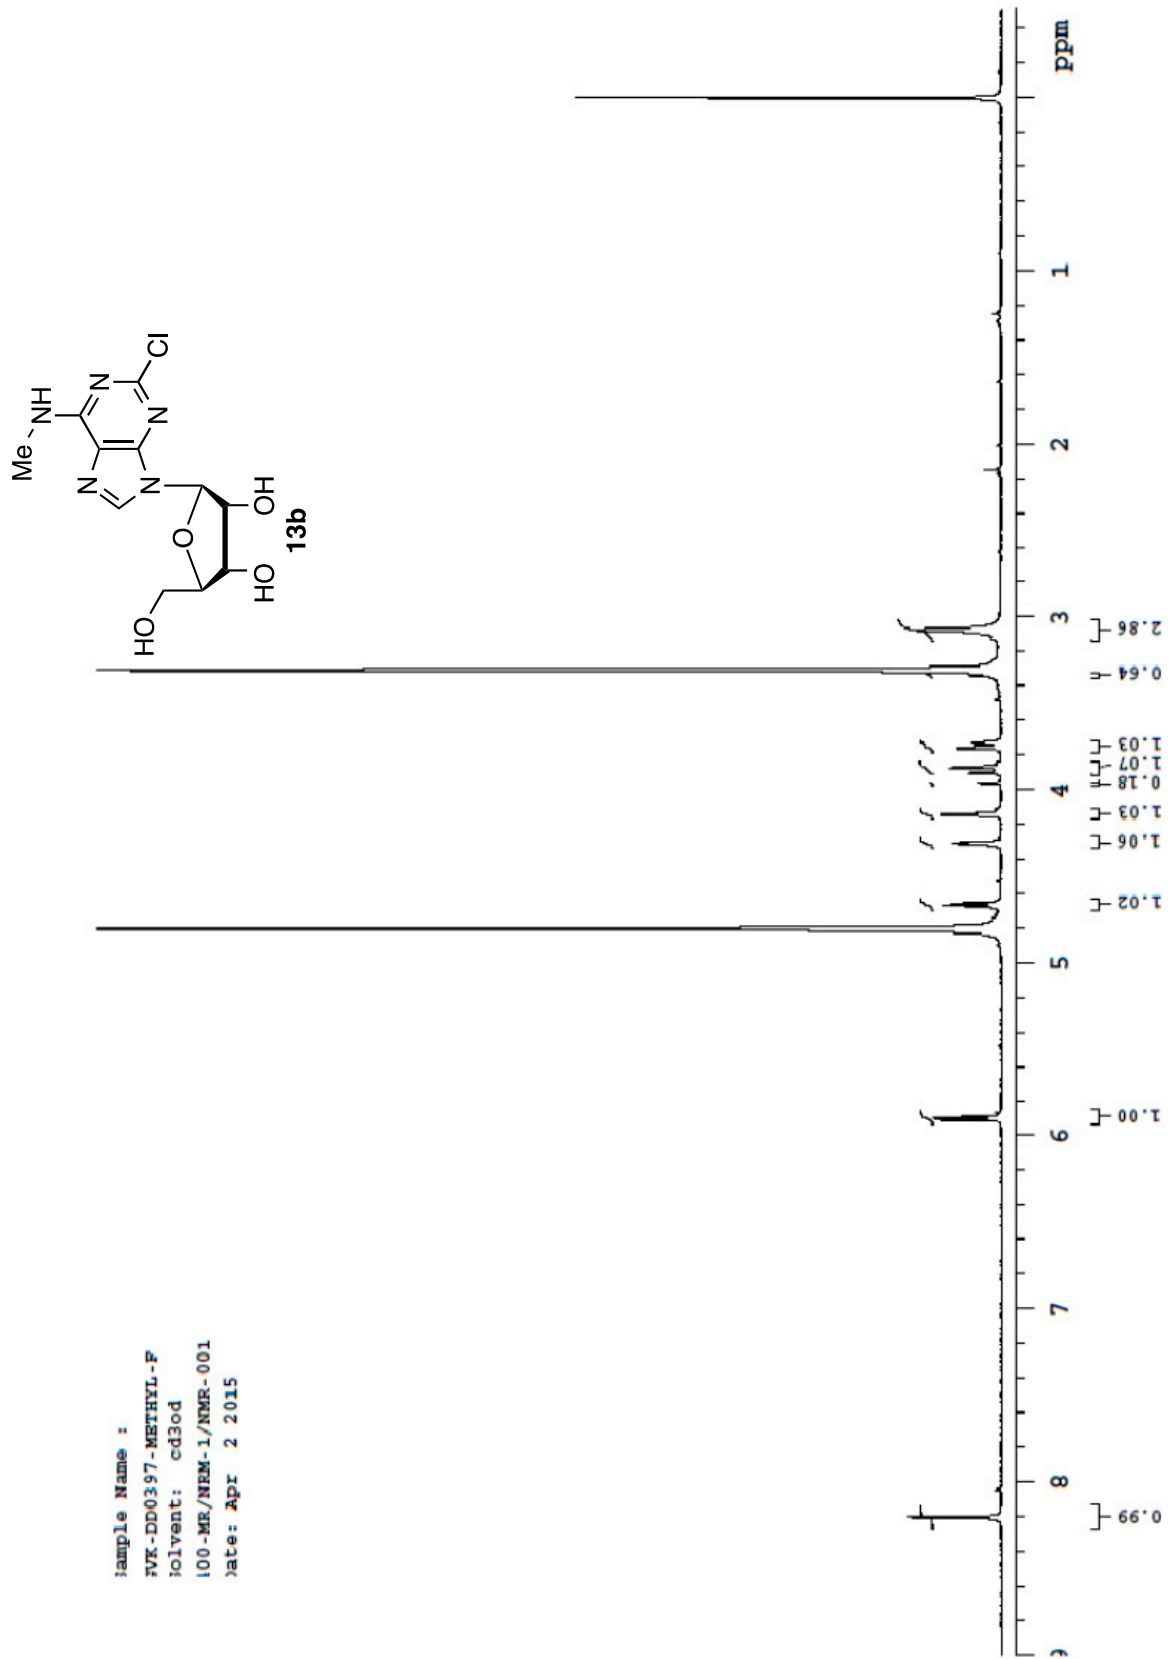

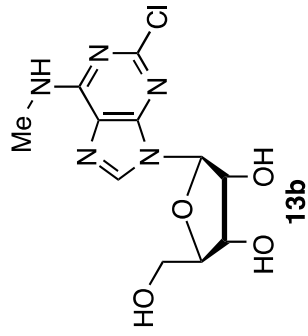

Reference Code: 021504B2796

Solvent: dmsd

Archive directory:

/home/gvkbio/data/2015/Apr

Agilent 400-MRDD2

Data collected on: Apr 13 2015

Experiment: CARBON

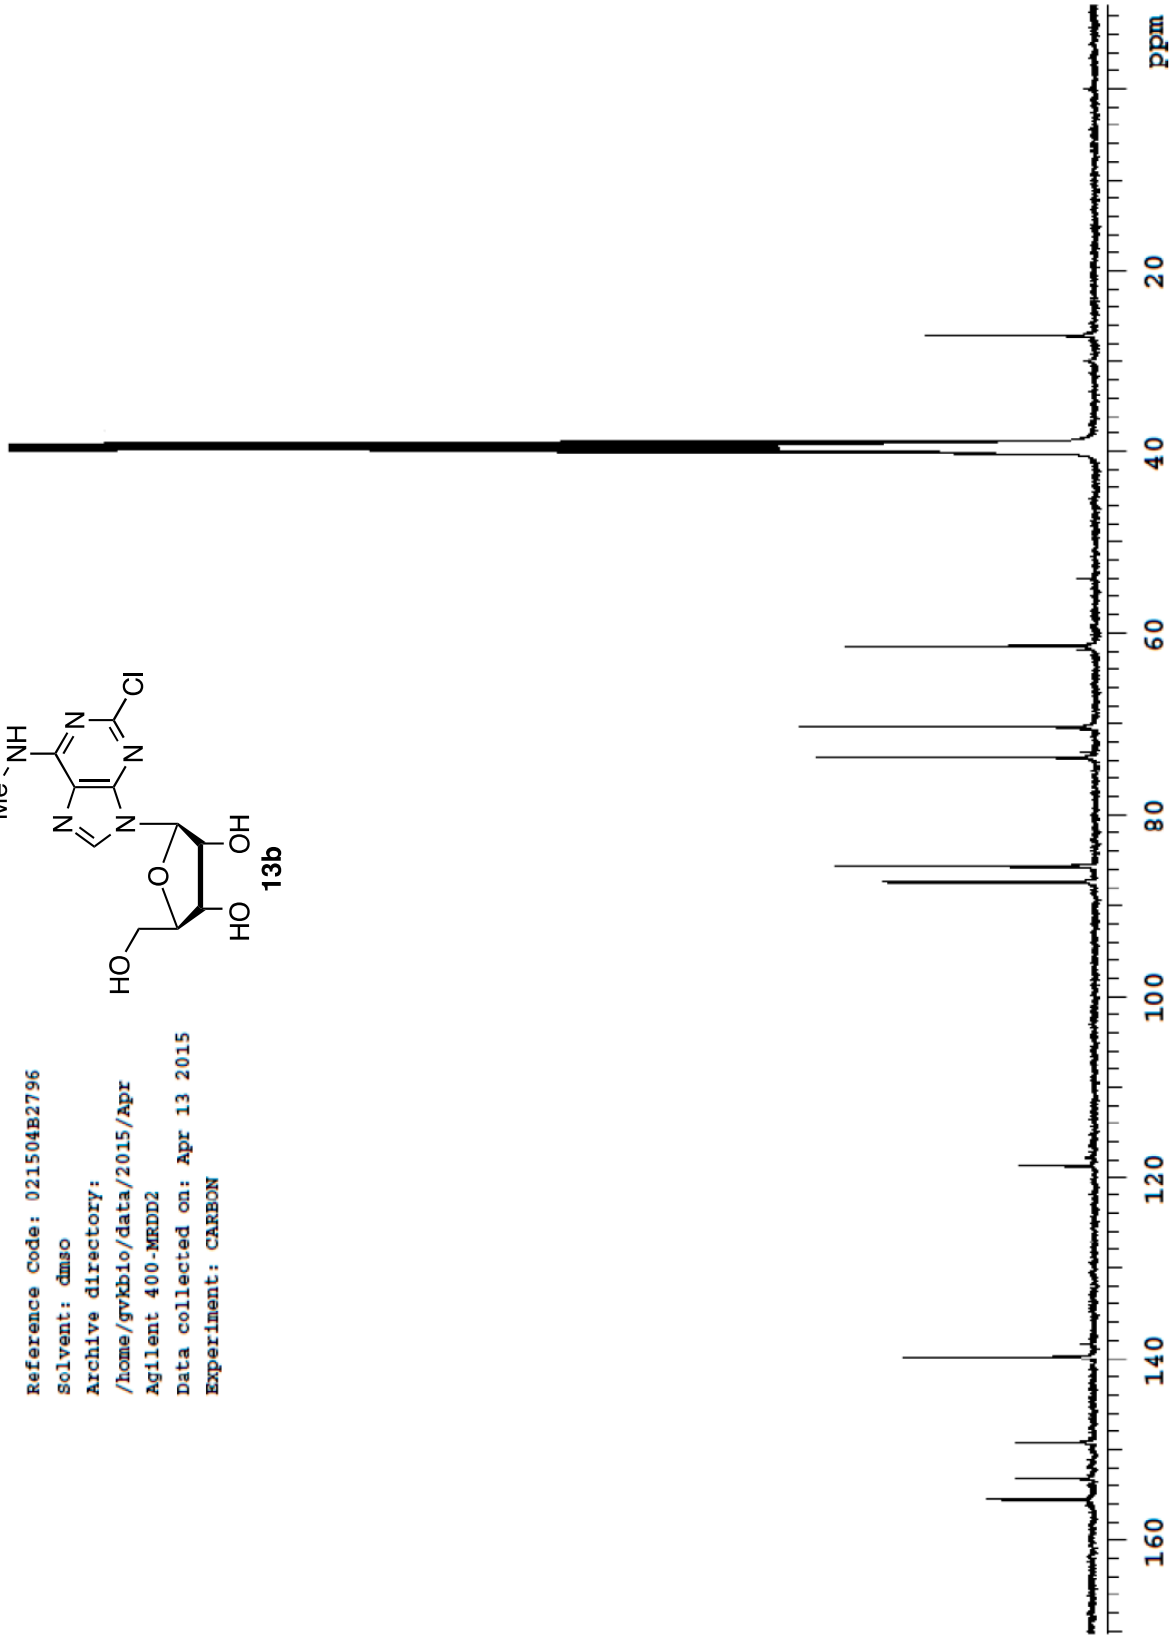

b

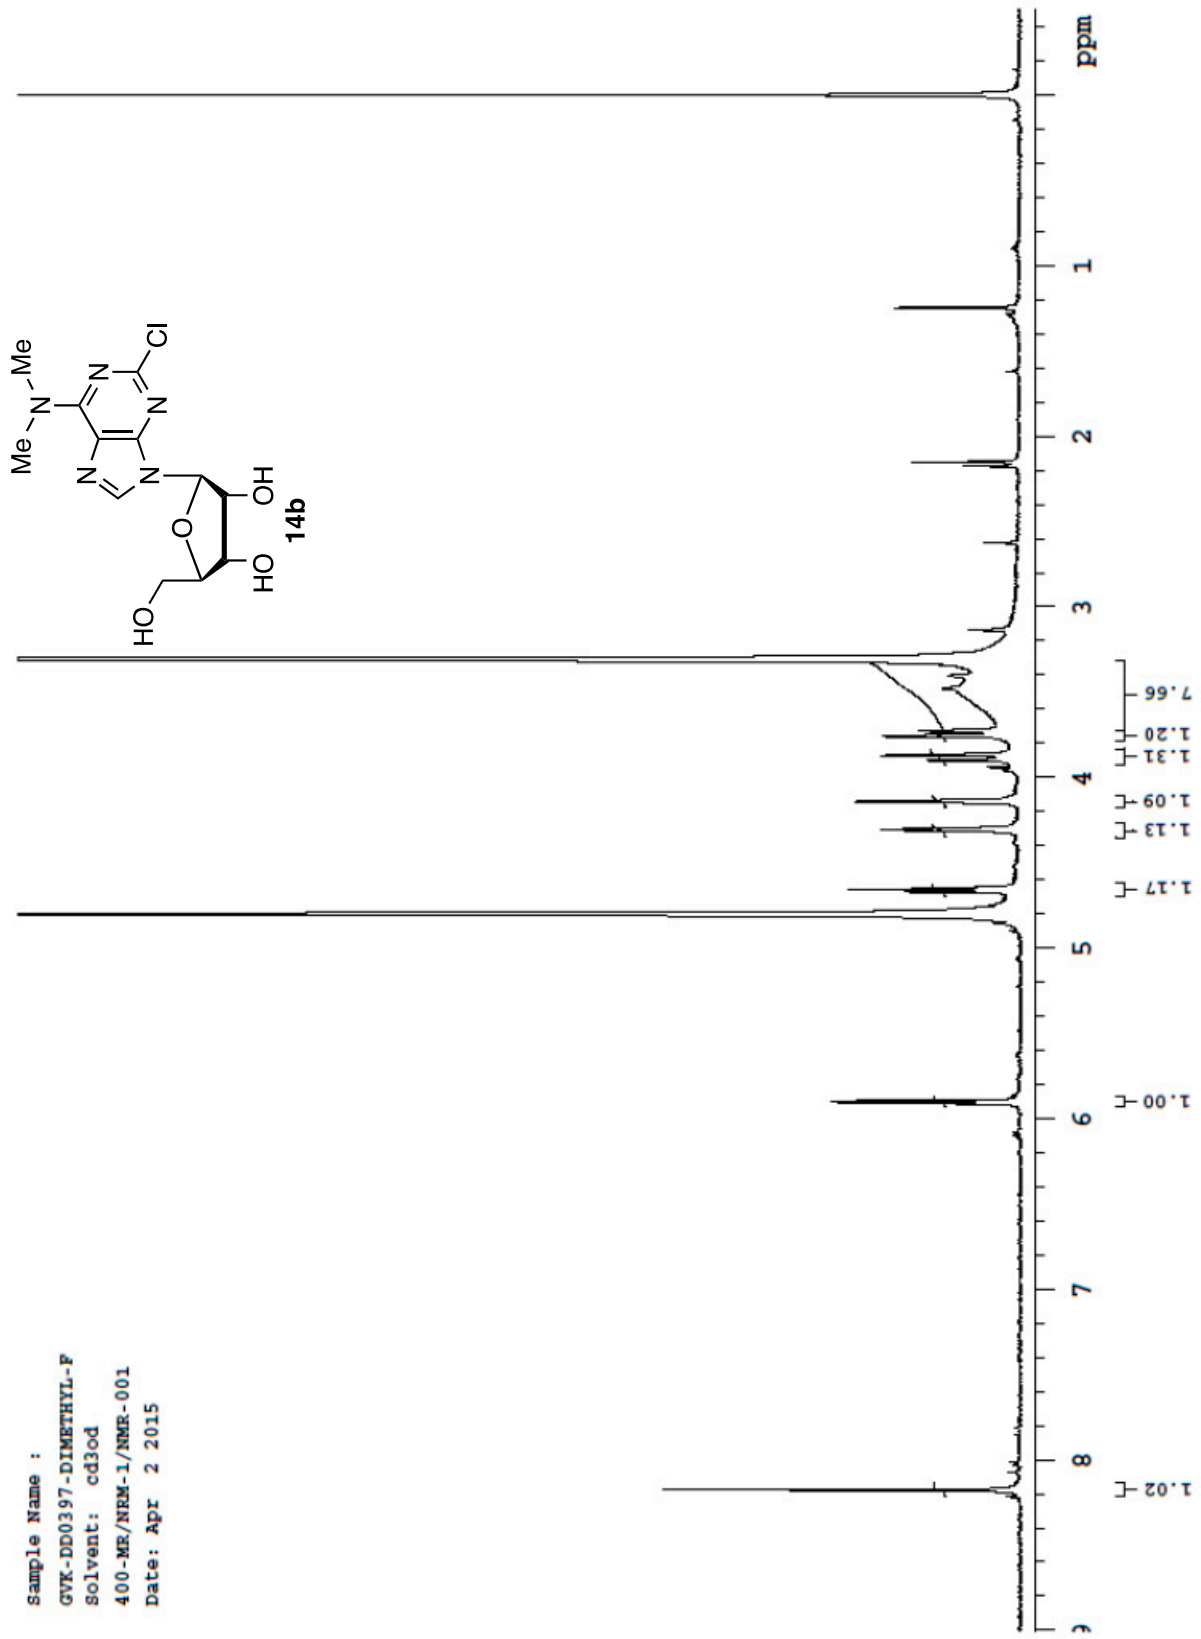

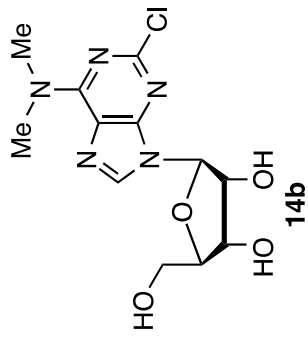

GVK-DD0397-DMe-F  
Reference Code: 021504B2813  
Solvent: dmsc  
Archive directory:  
/home/gvkbio/data/2015/Apr  
Agilent 400-MRDD2  
Data collected on: Apr 12 2015  
Experiment: CARBON

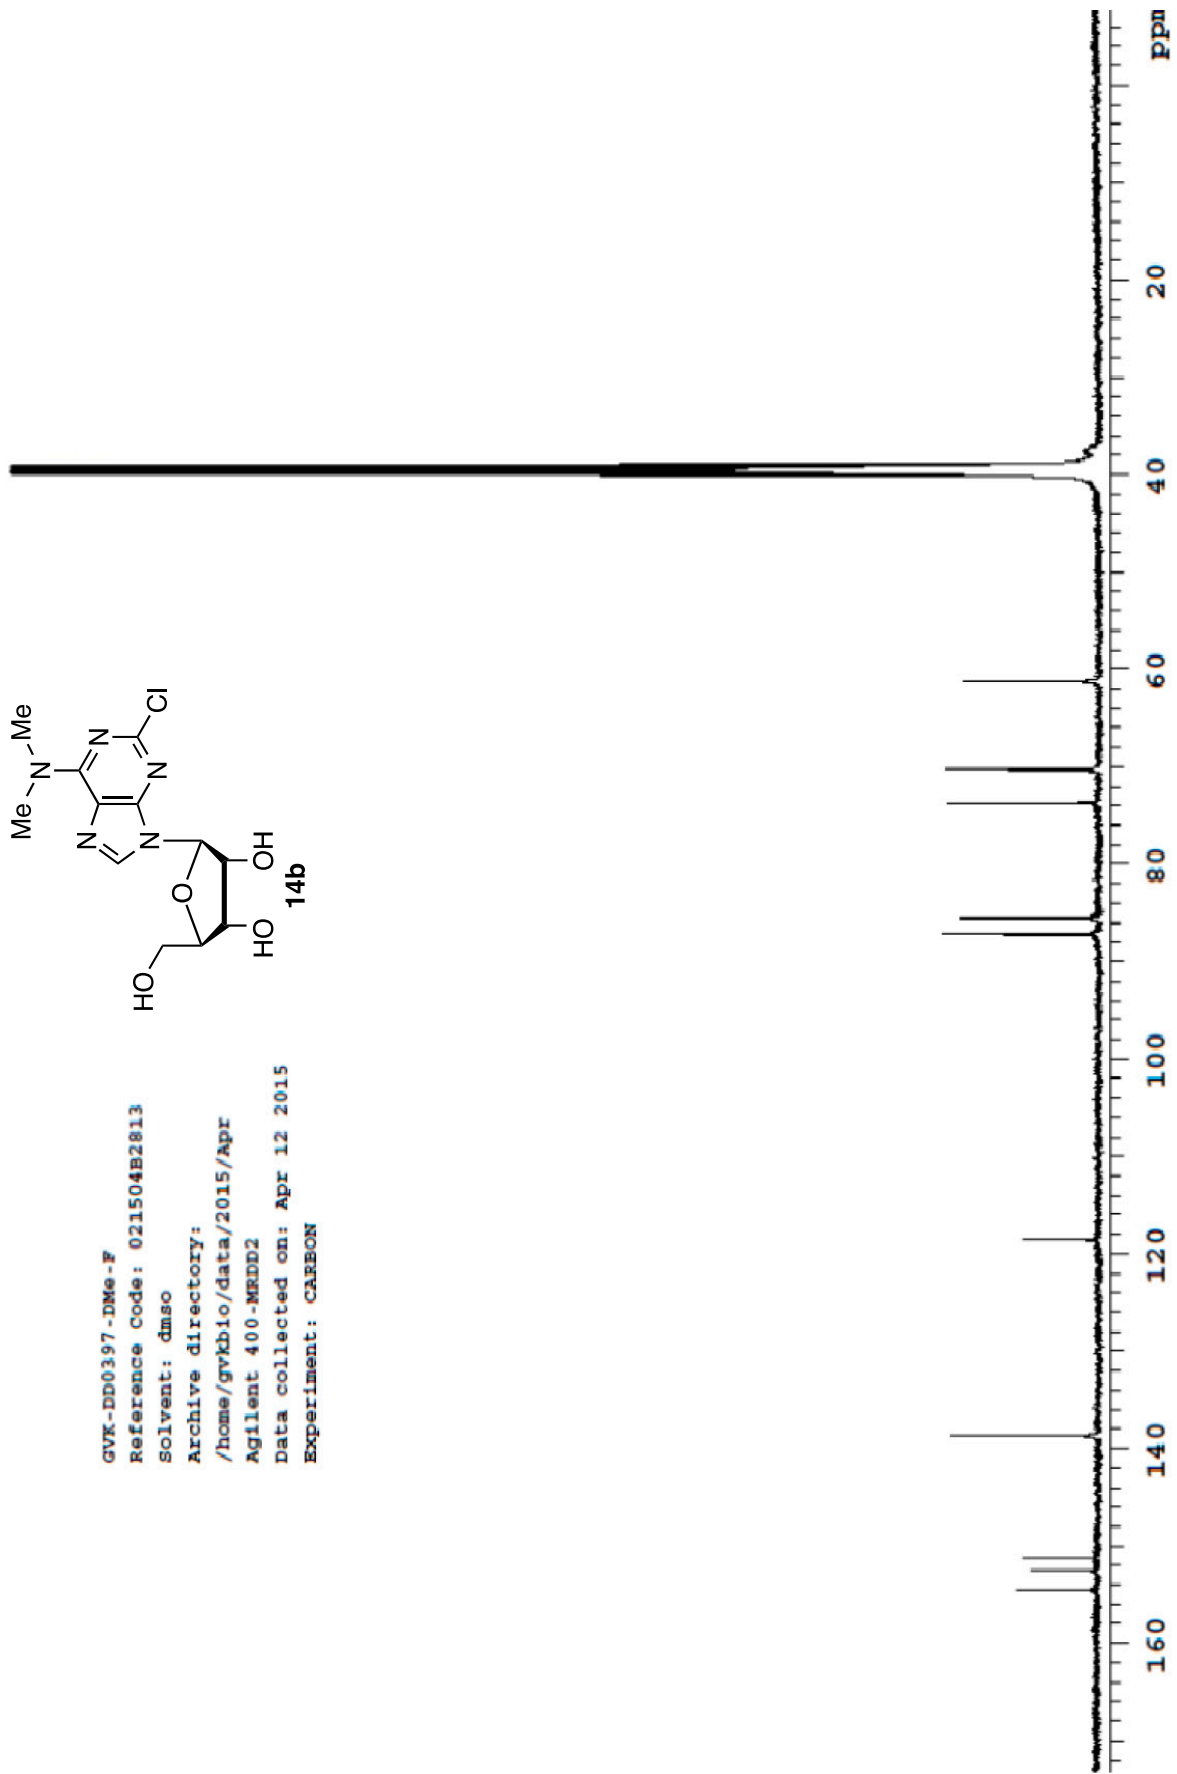

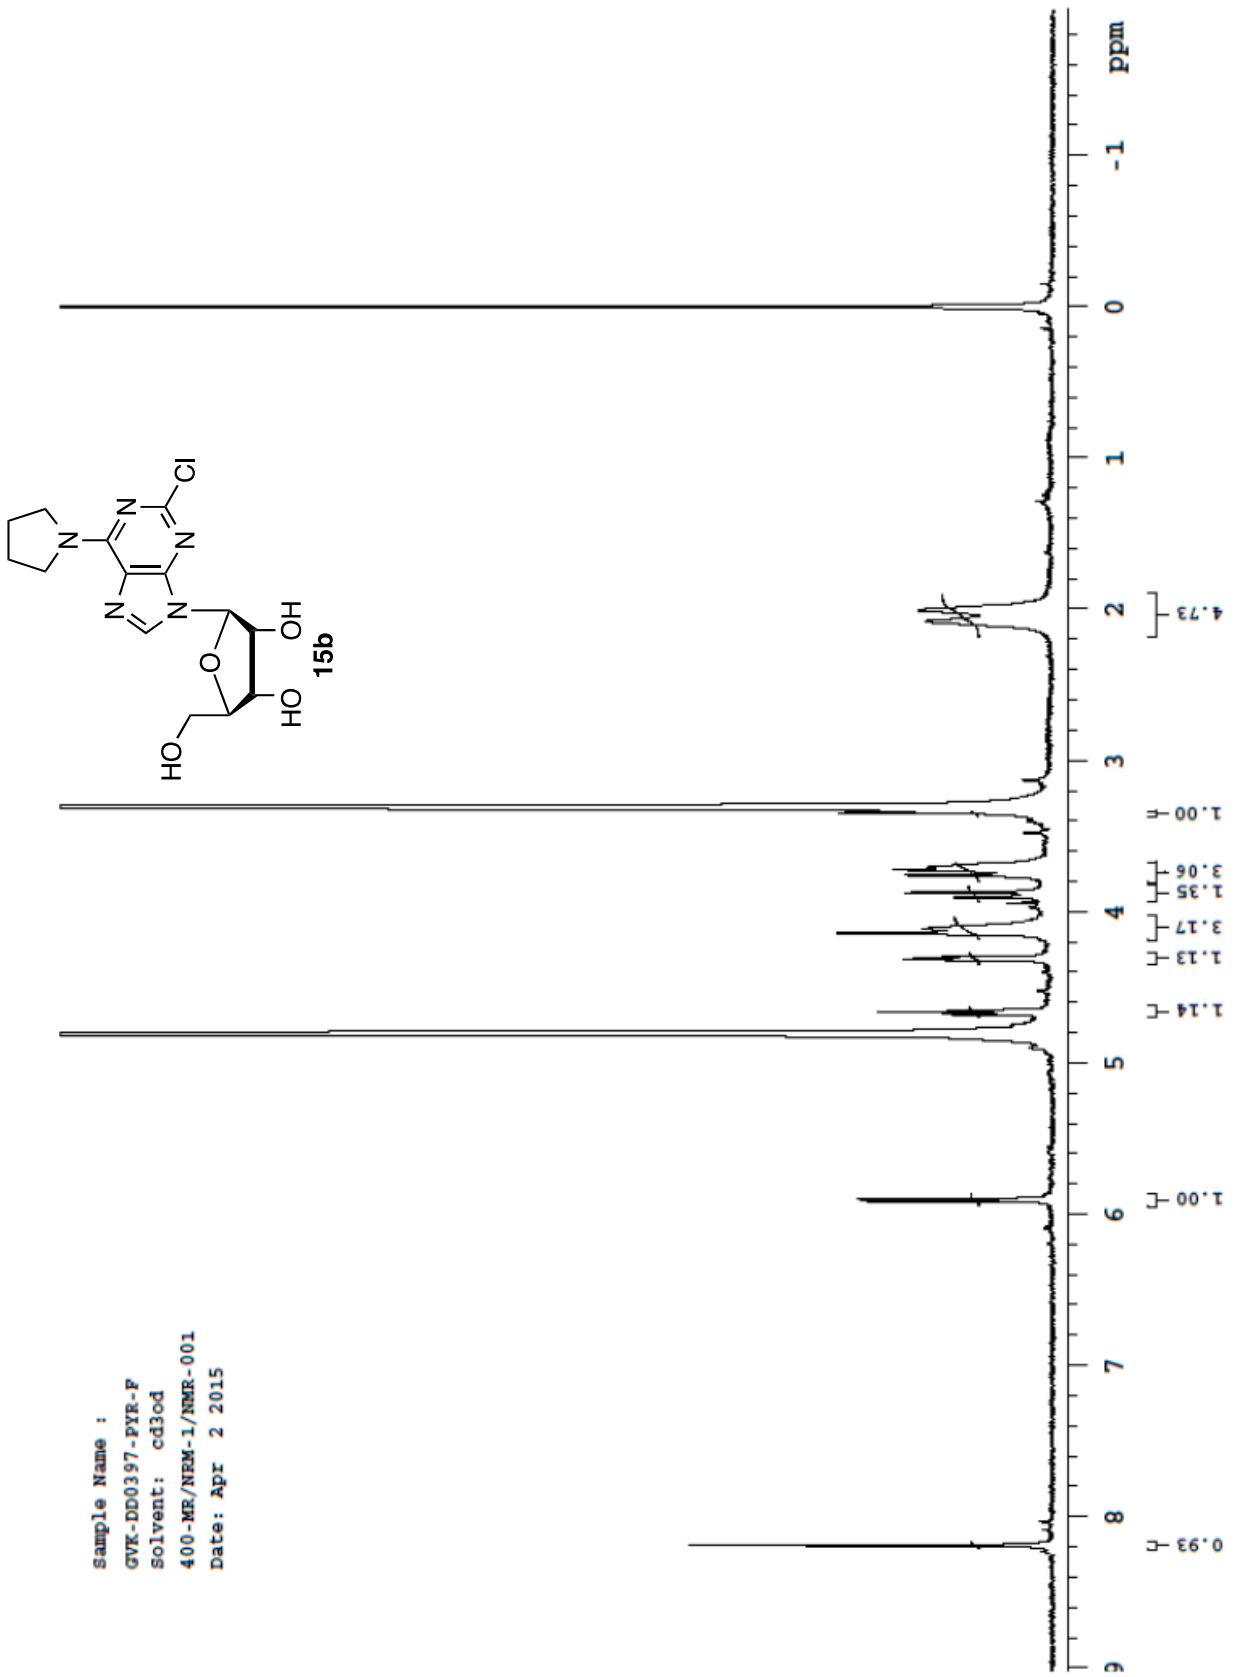

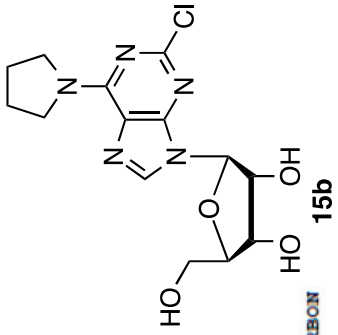

Sample Name:  
GVK-DD0397-Pyr-F

Solvent: dmsu  
Date: Apr 10 2015  
Agilent 400-MR / NRM-3  
Request No: 02150481188\_CARBON

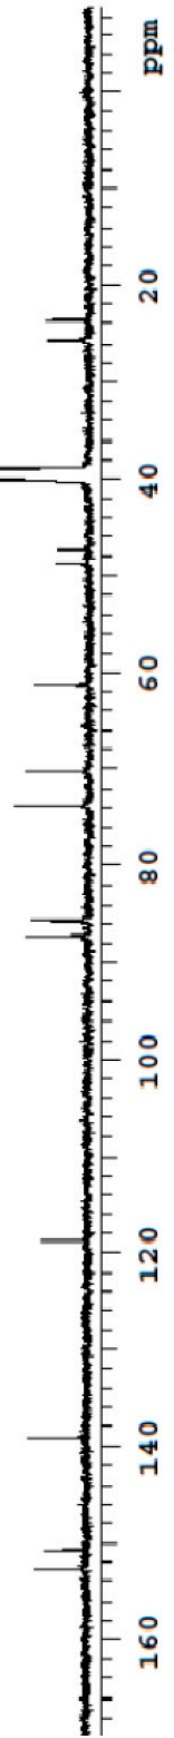



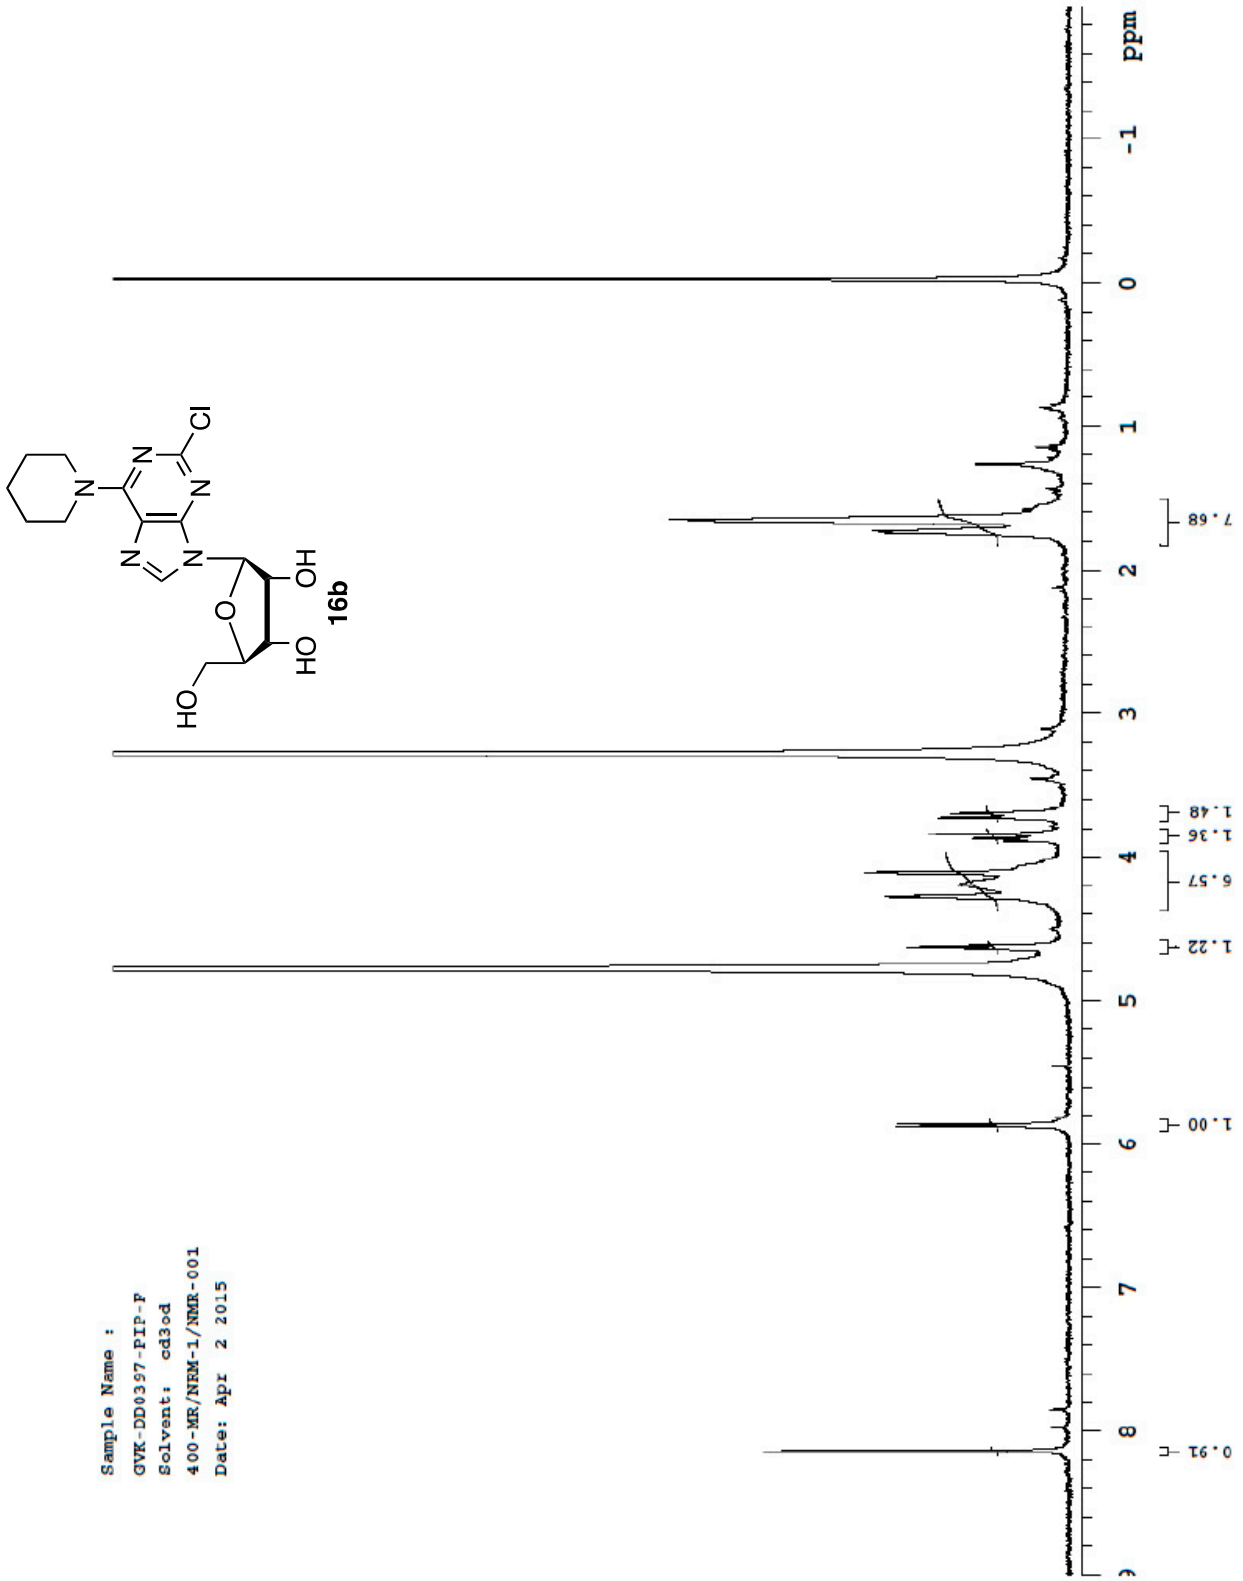

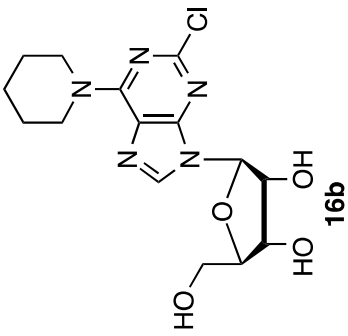

GVK-DD0397-PIP-F  
Reference Code: 021504B2820  
Solvent: dms0  
Archive directory:  
/home/gvkbio/data/2015/APR  
Agilent 400-MRDD2  
Data collected on: Apr 11 2015  
Experiment: CARBON

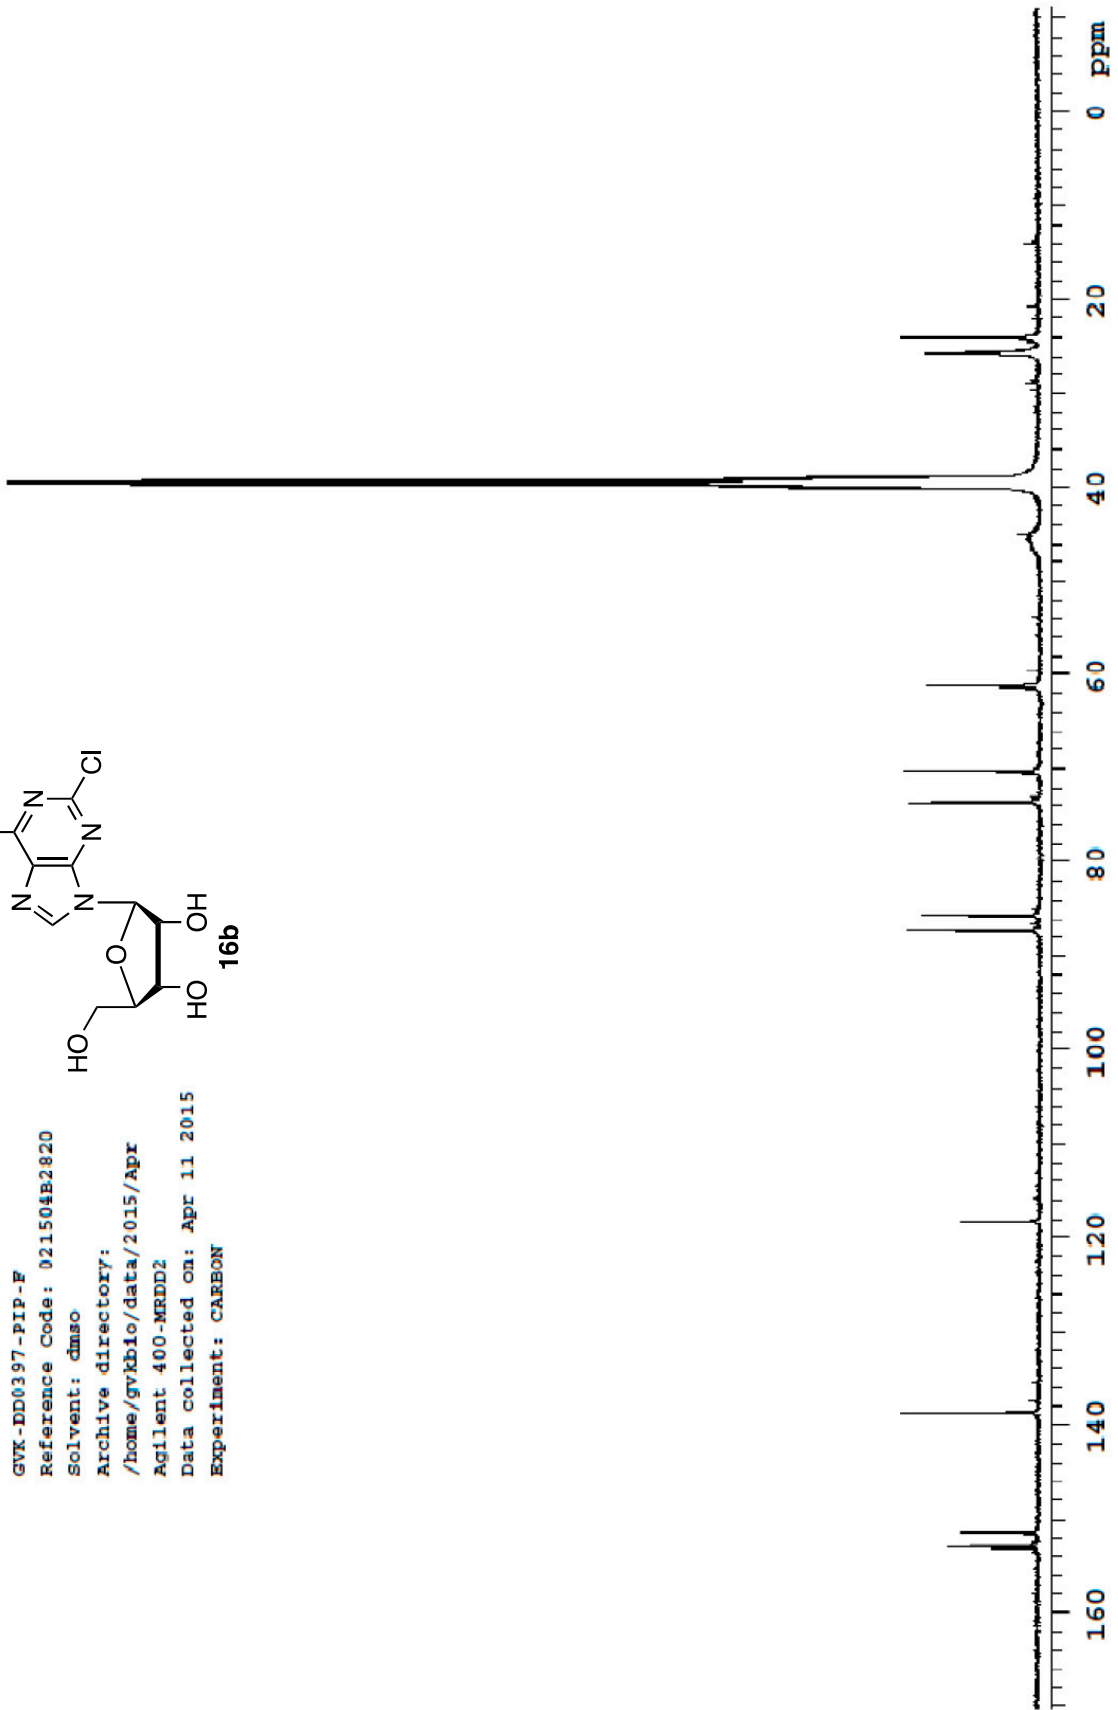

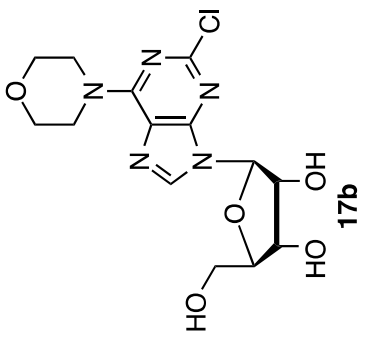

Sample Name :  
GVK-DD0397-MOY-F  
Solvent: cd3od  
400-ME/NRM-1/NMR-001  
Date: Apr 2 2015

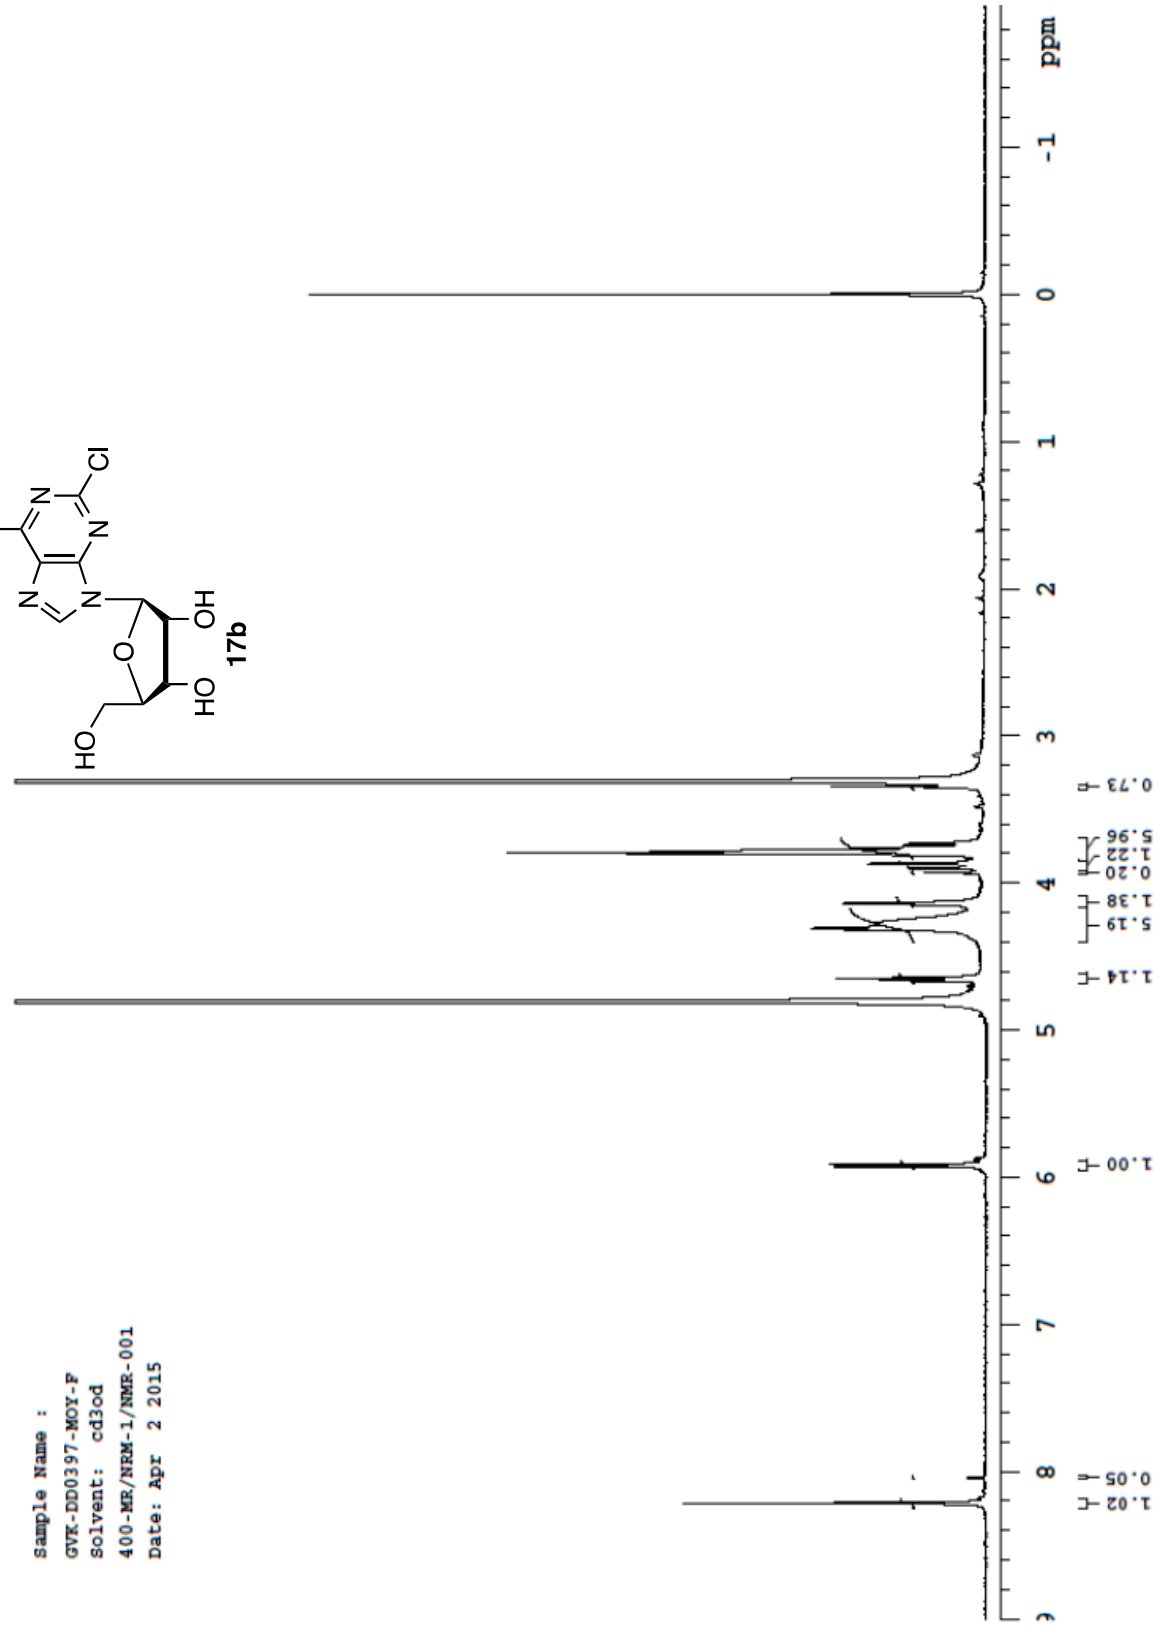

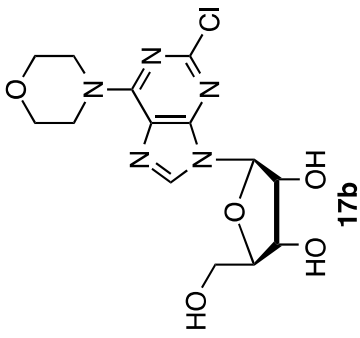

GVK-DD0397-MOV-F  
Reference code: 021504B2811  
Solvent: dms0  
Archive directory:  
/home/gvkbio/data/2015/Apr  
Agilent 400-MBDD2  
Data collected on: Apr 12 2015  
Experiment: CARBON

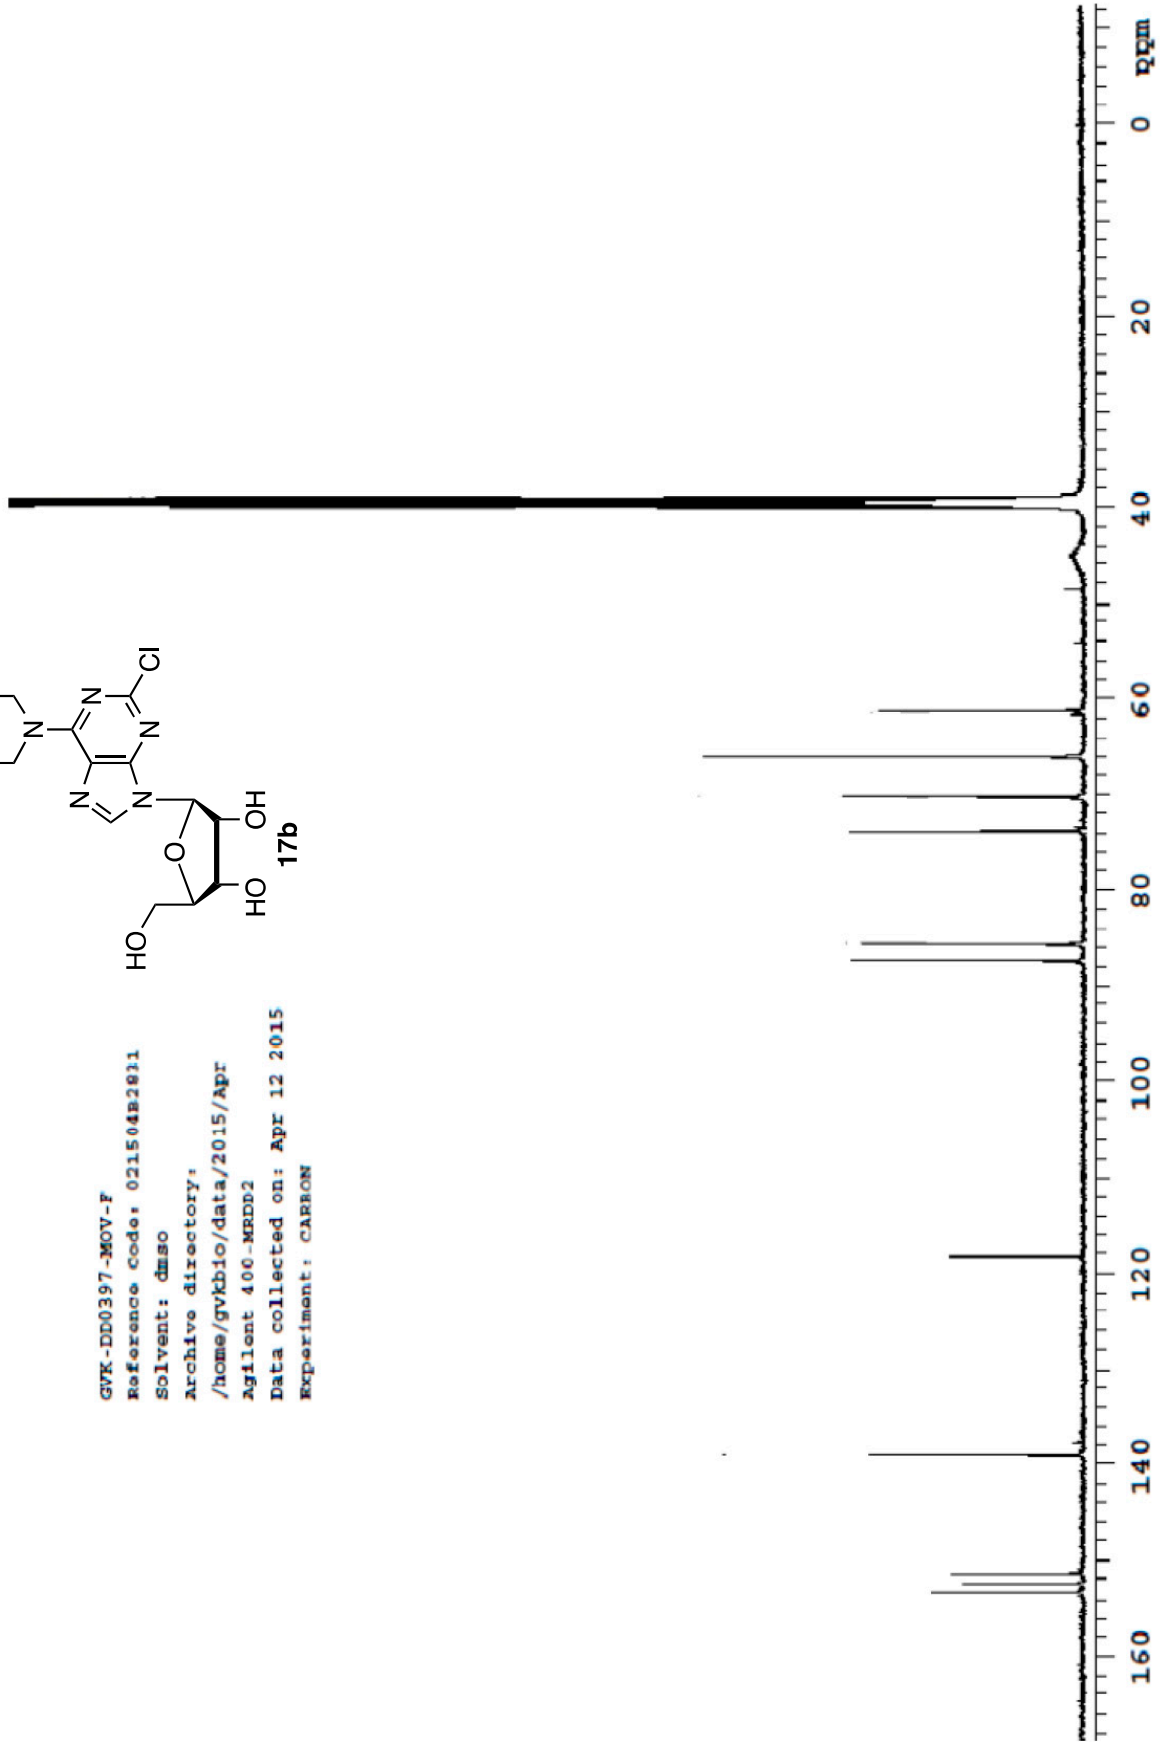

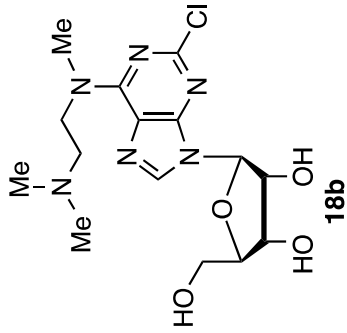

Sample Name :  
 GVK-DD0397-TME-F  
 Solvent: cd3od  
 400-ME/NEM-1/NME-001  
 Date: May 10 2015

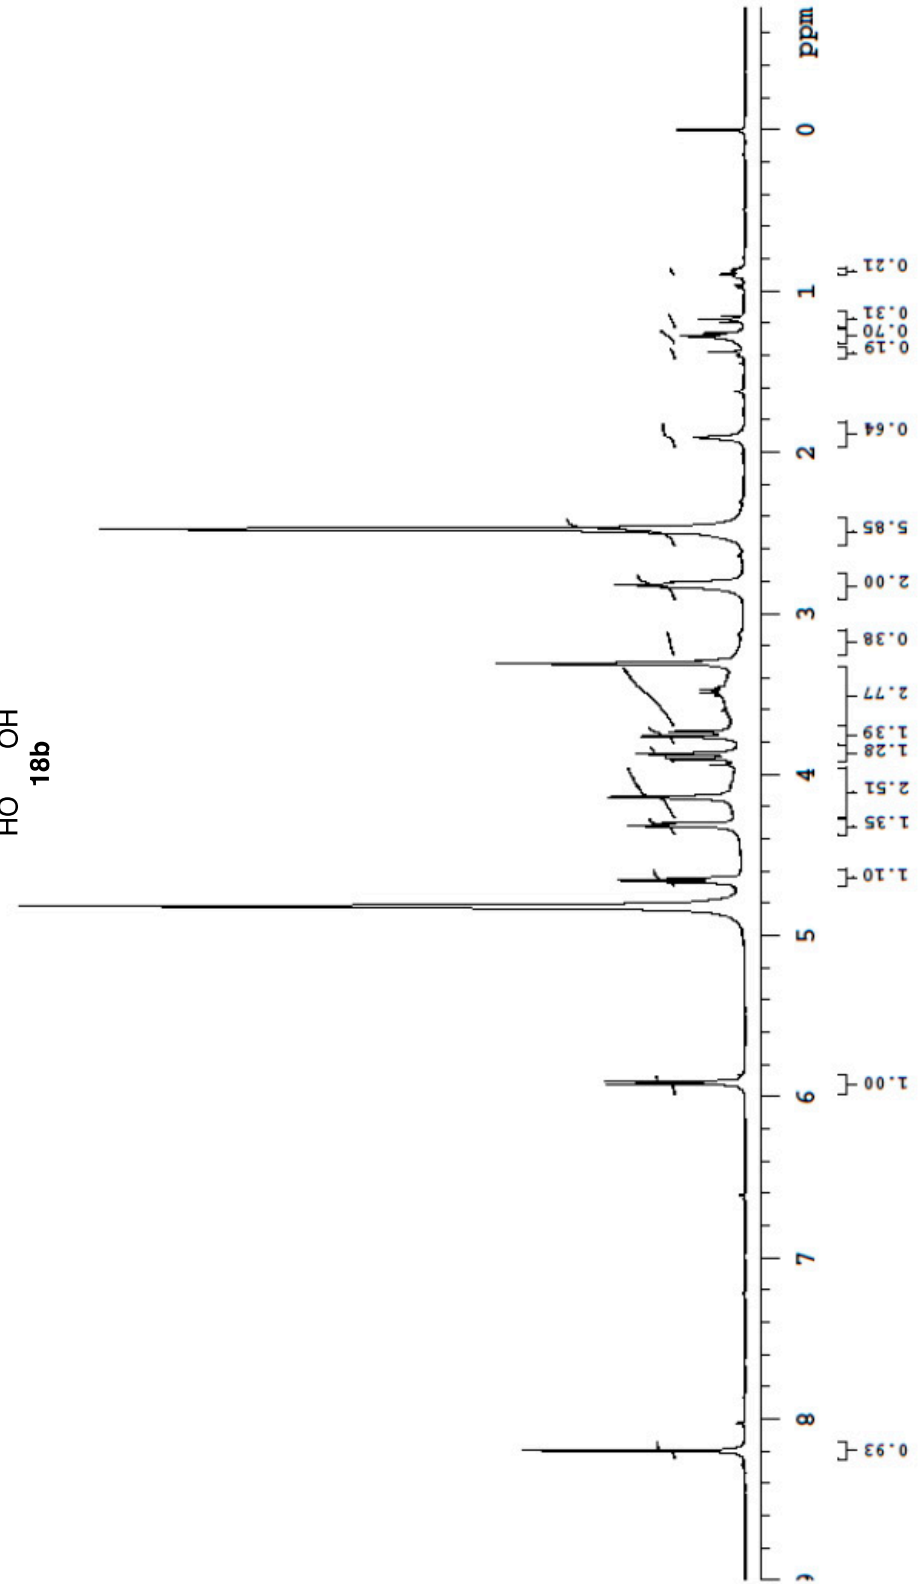

Sample Name :  
GVK-DD0397-TME-F  
Solvent: cd3od  
400-MR/NRM-1/NMR-001  
Date: May 10 2015

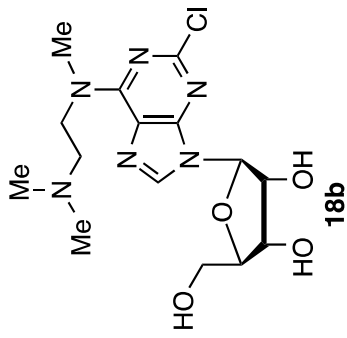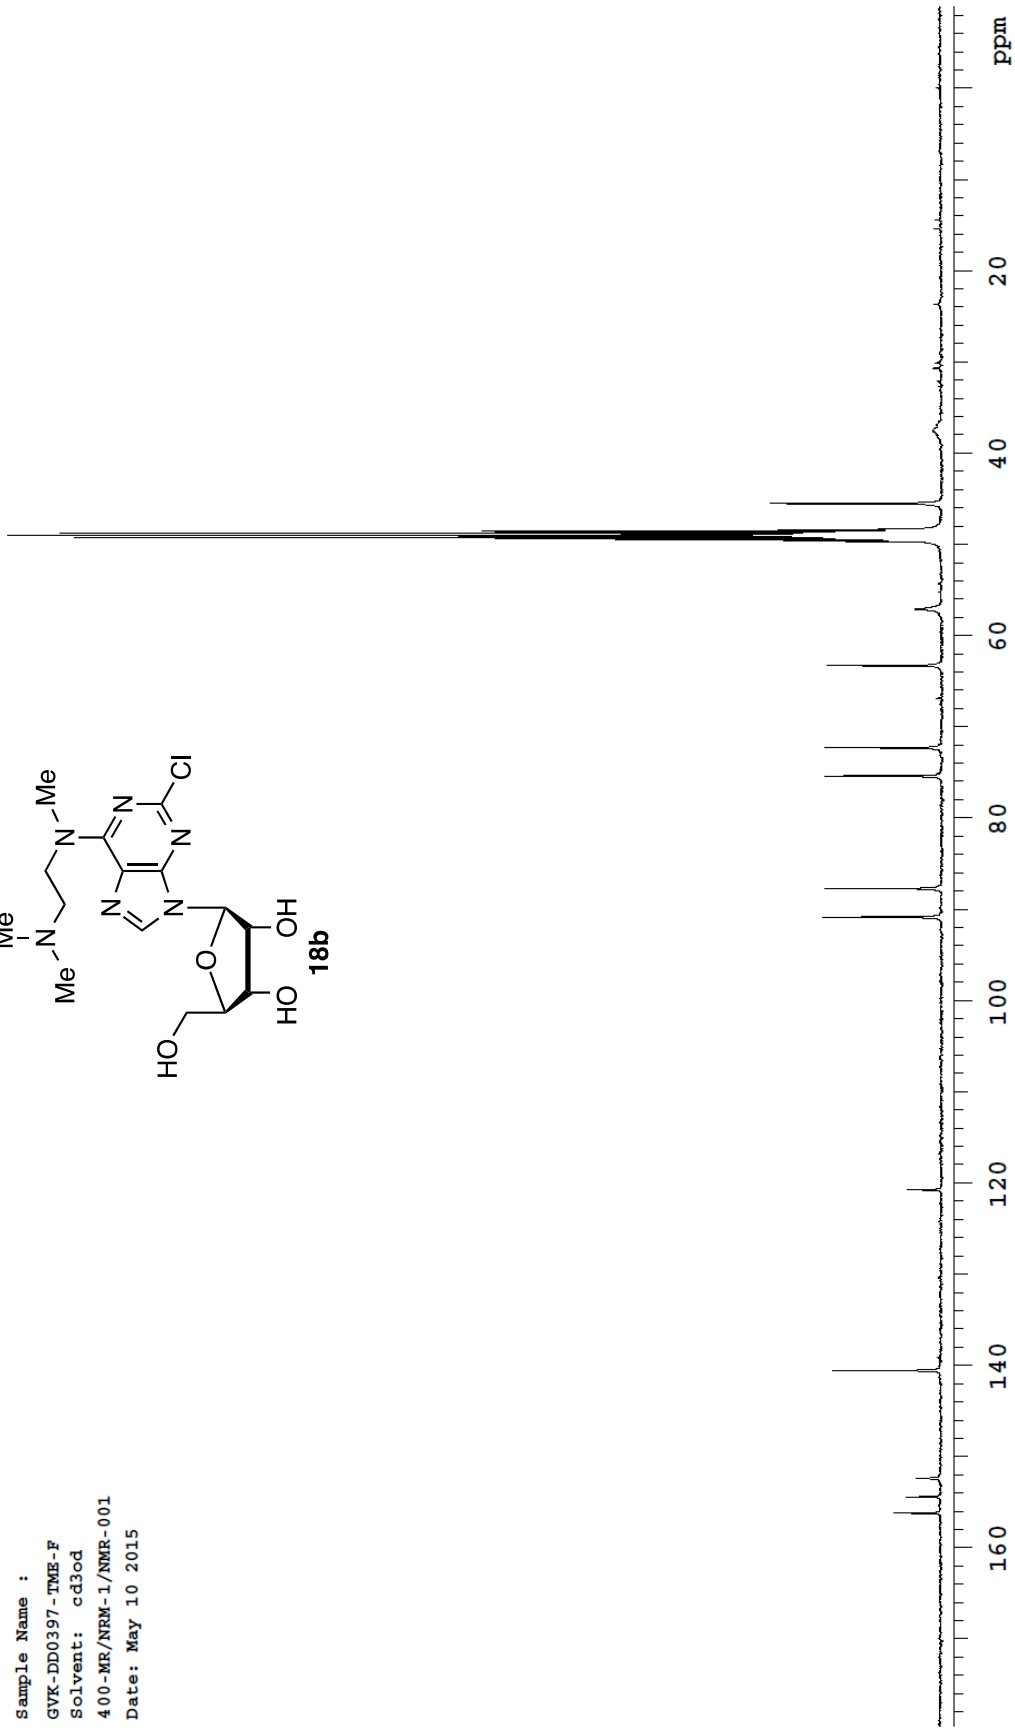

Plotname: 021505A7314\_CARBON\_01\_plot04

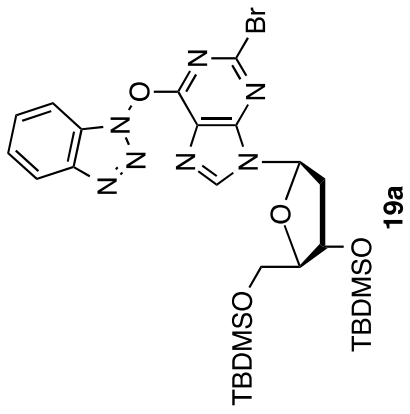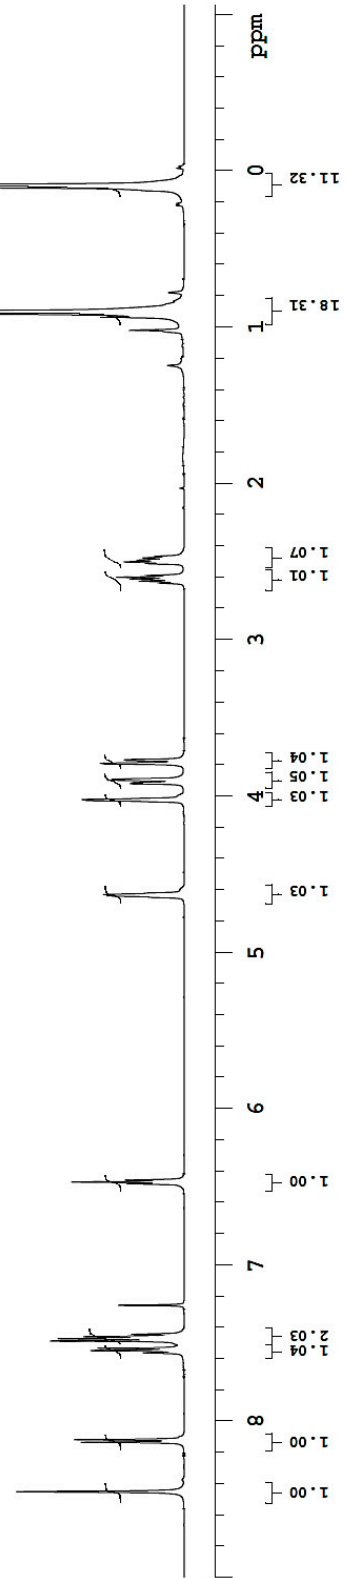

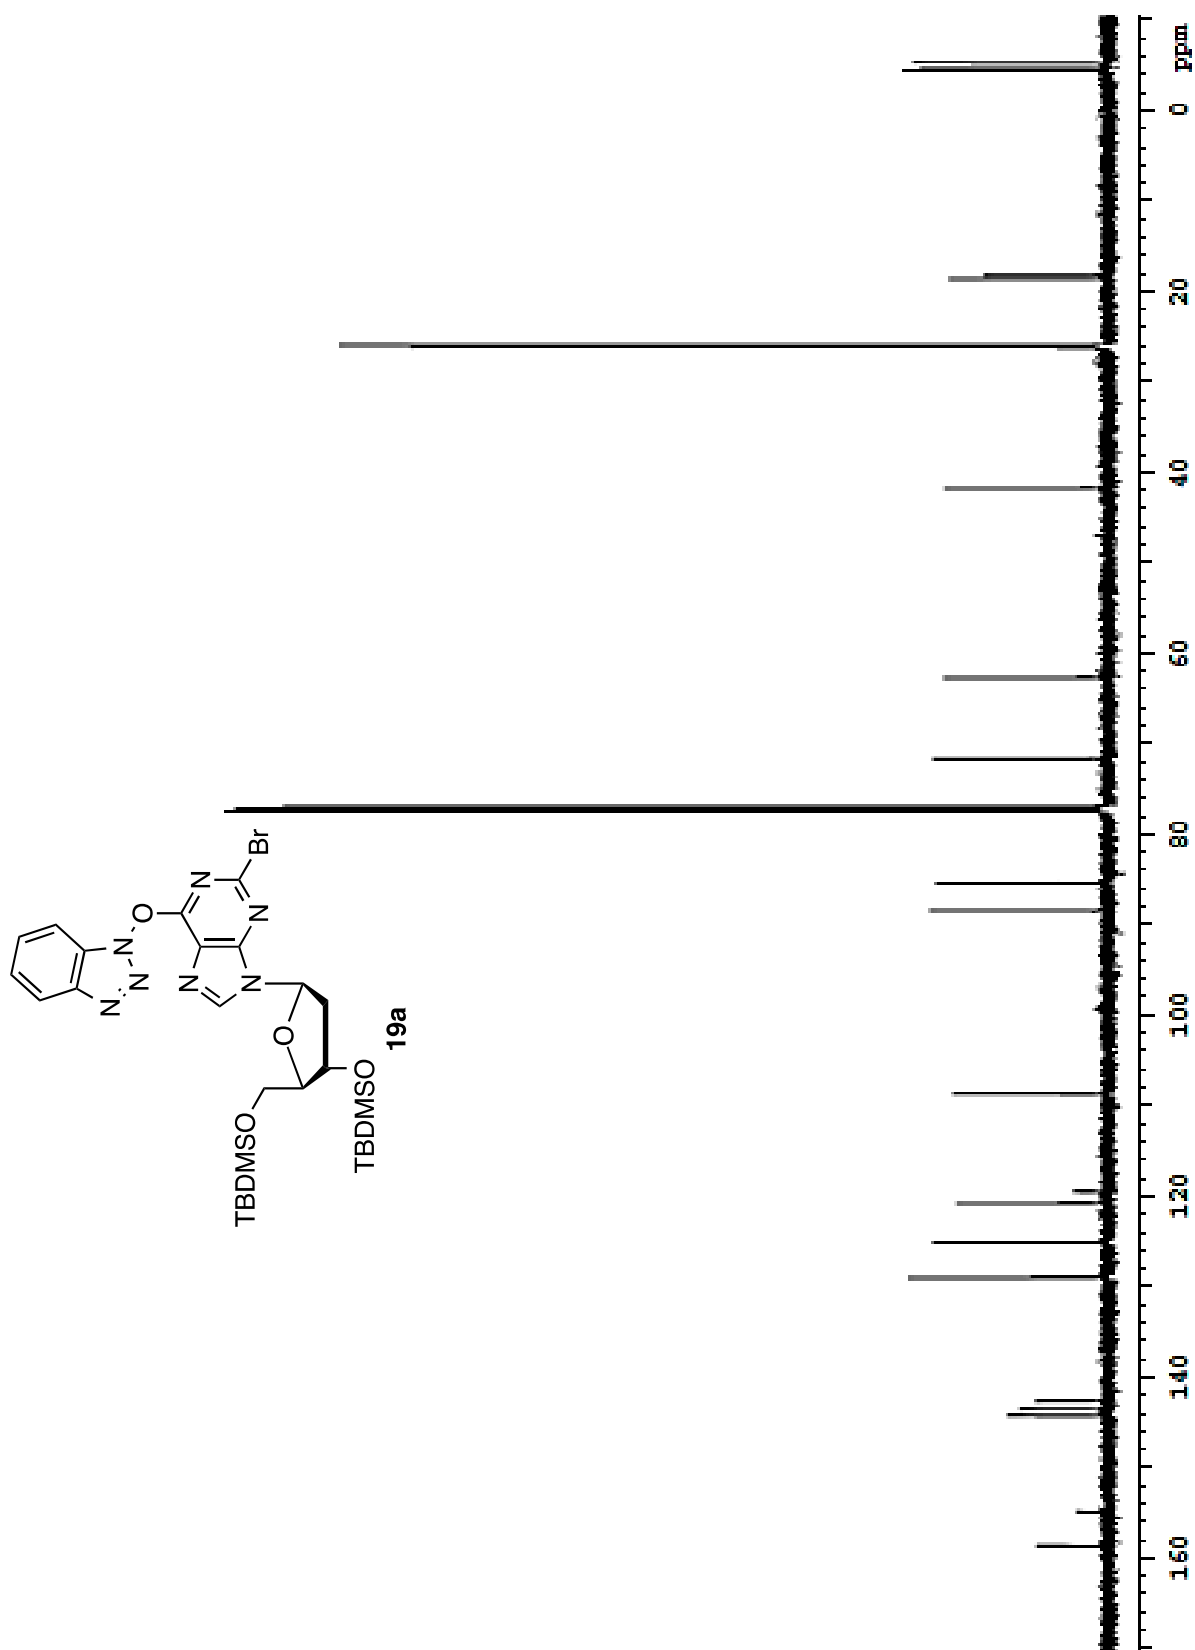



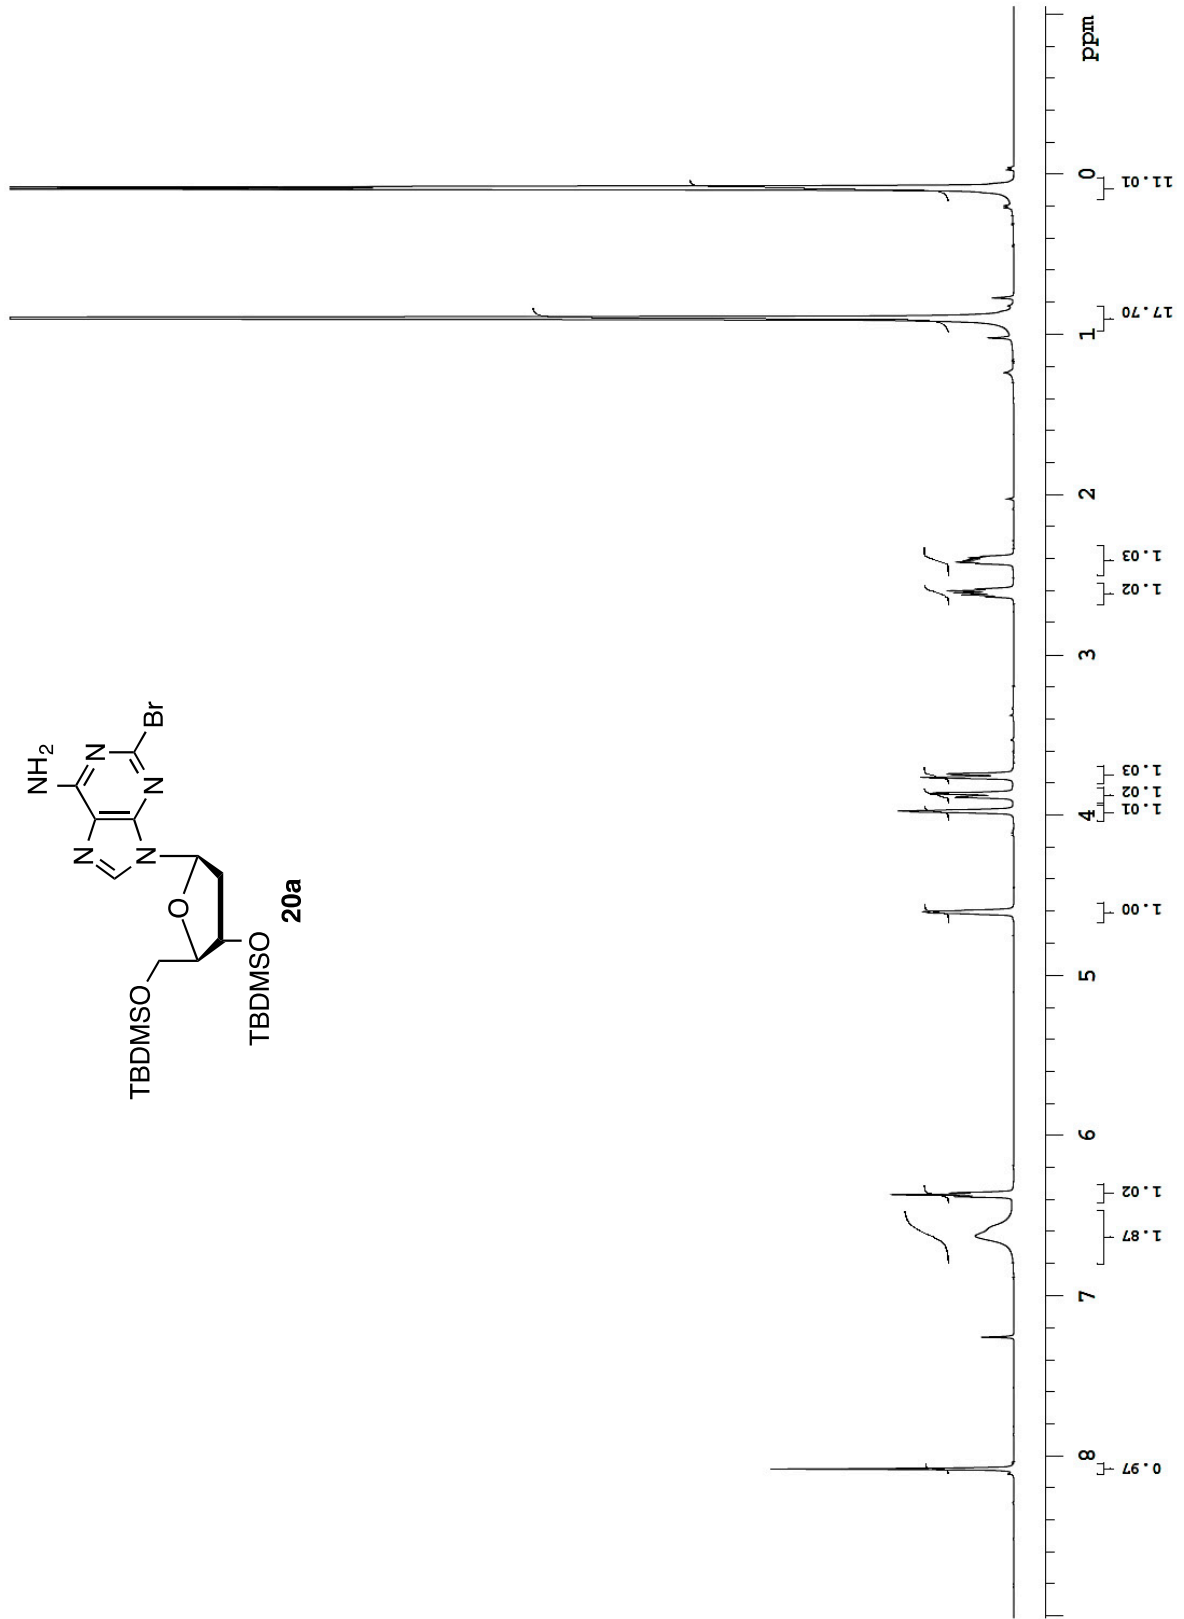

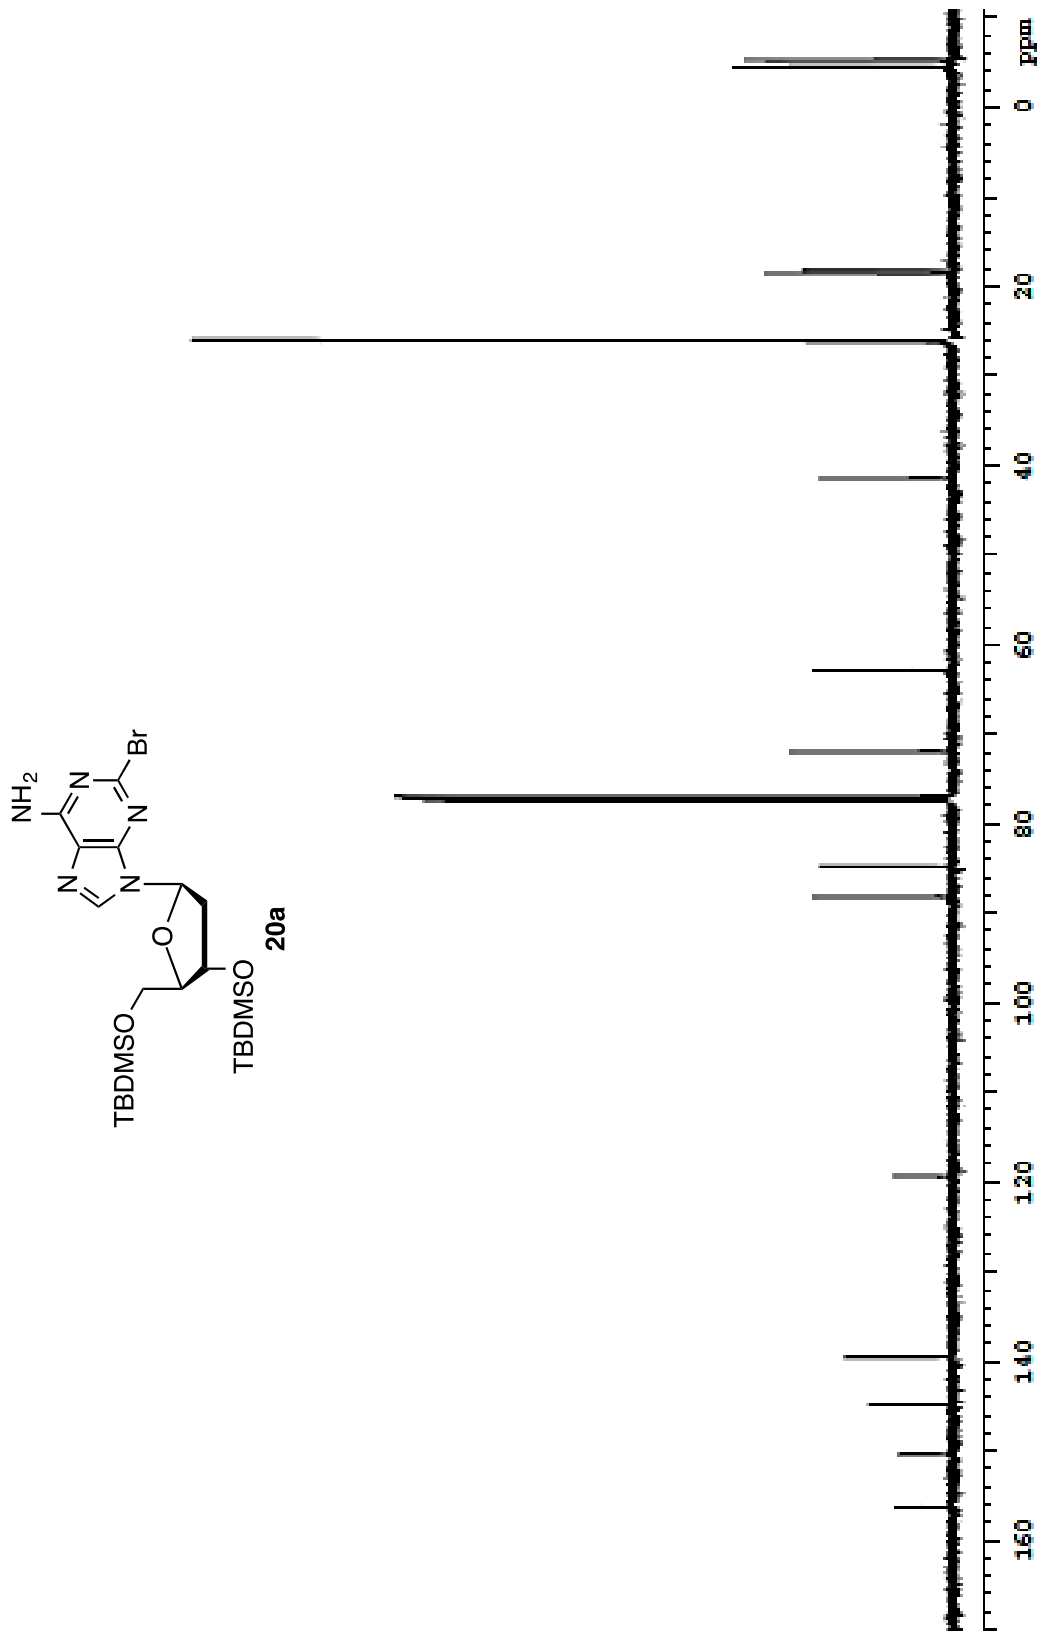

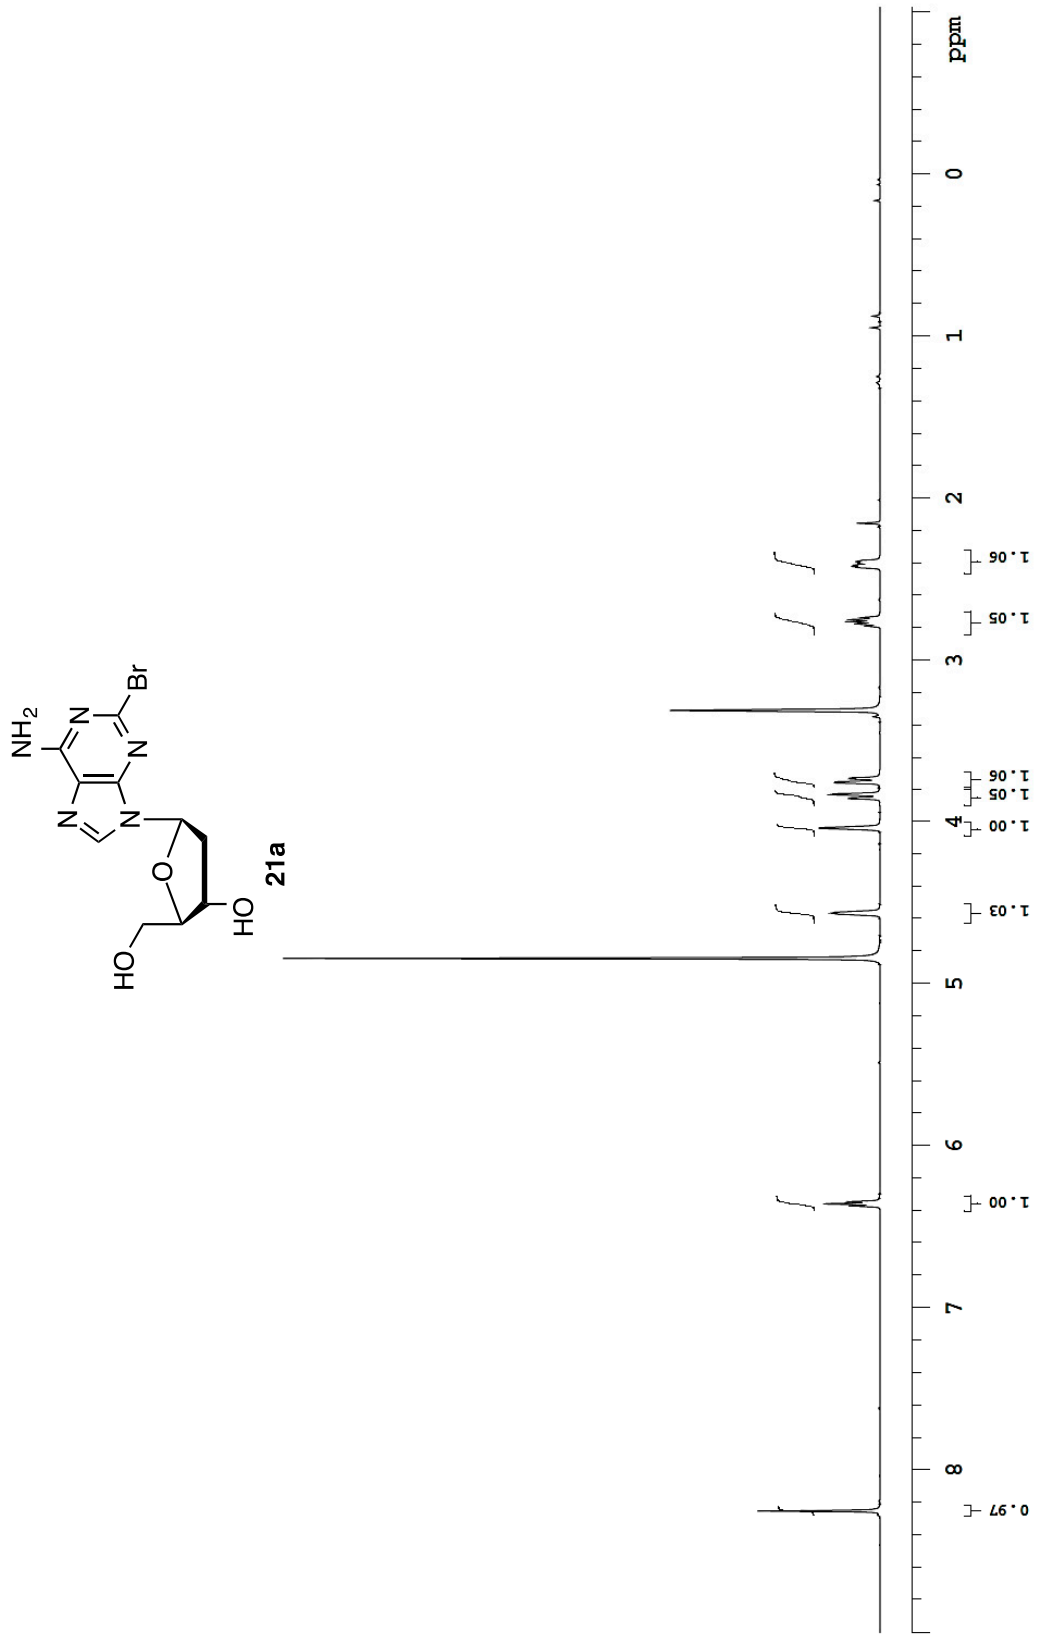

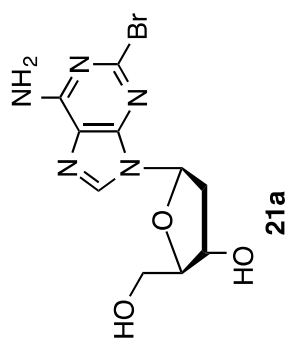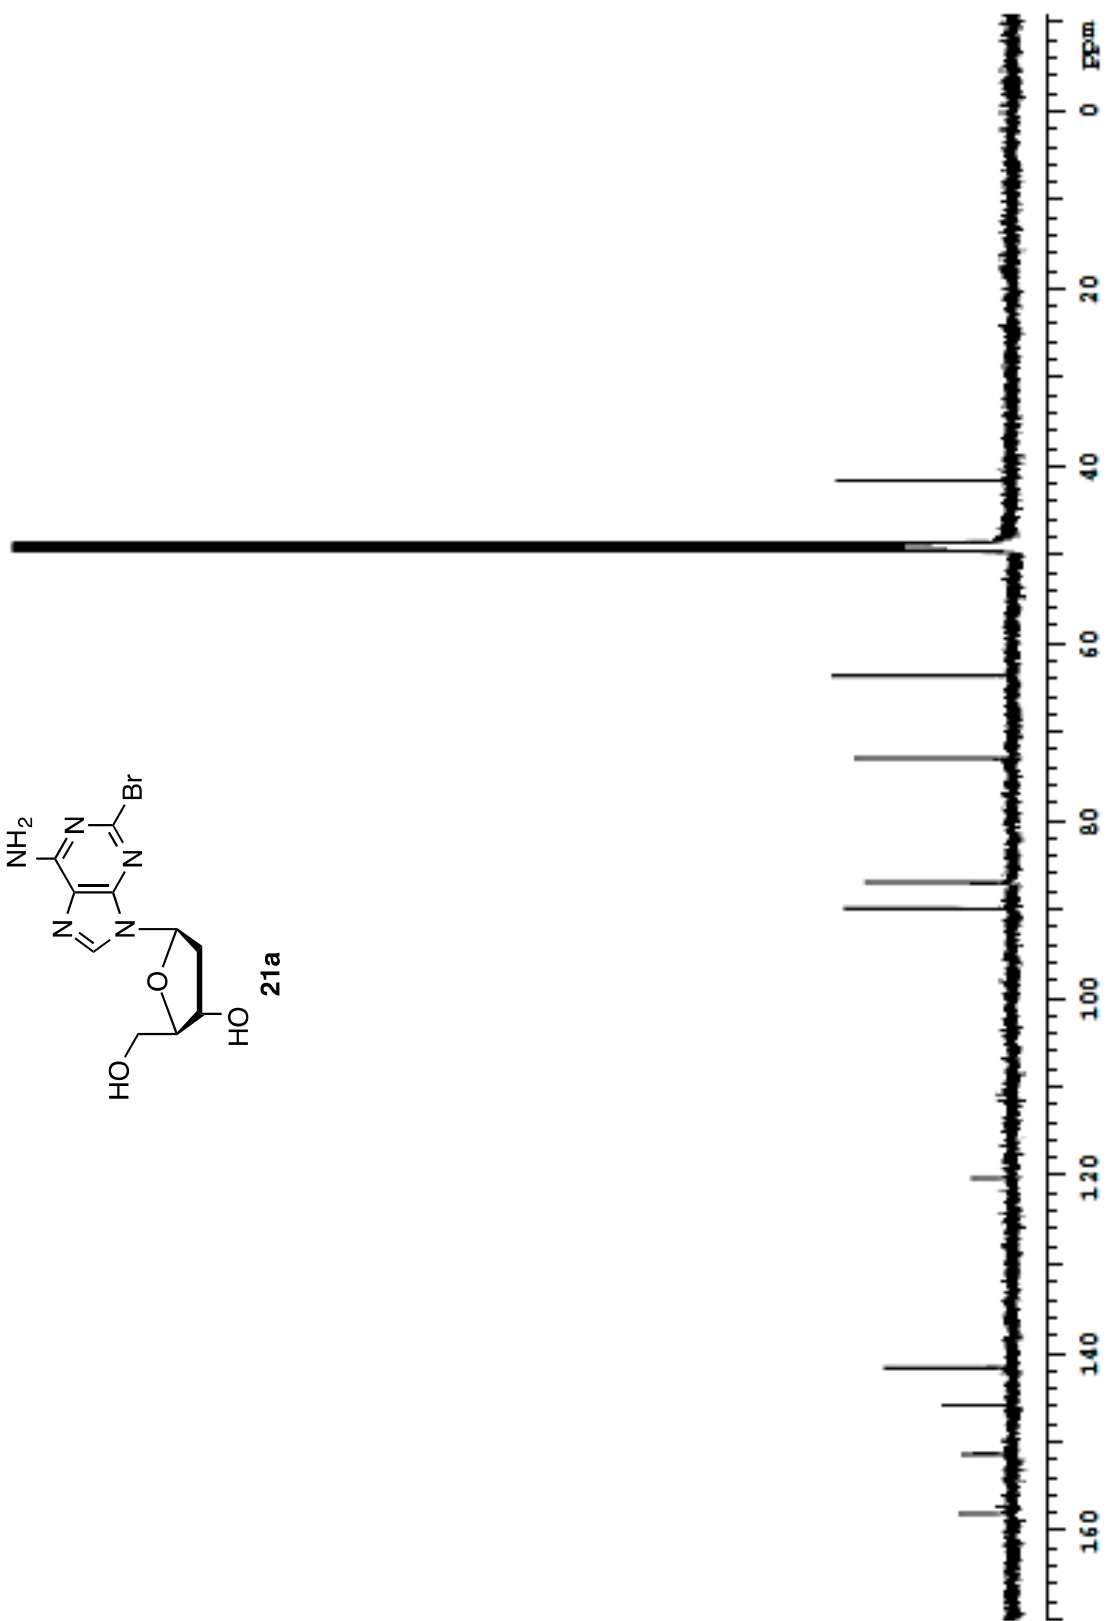

Sample Name :  
GVK-DD0397-BR-F  
Solvent: cdcl3  
400-MR/NMR-1/NMR-001  
Date: Apr 17 2015

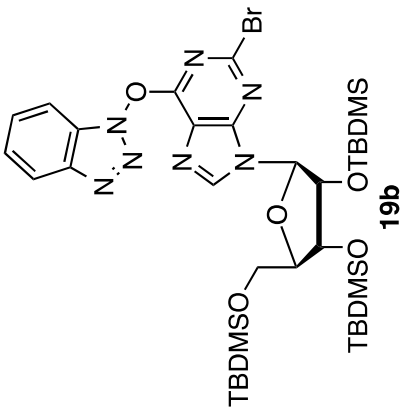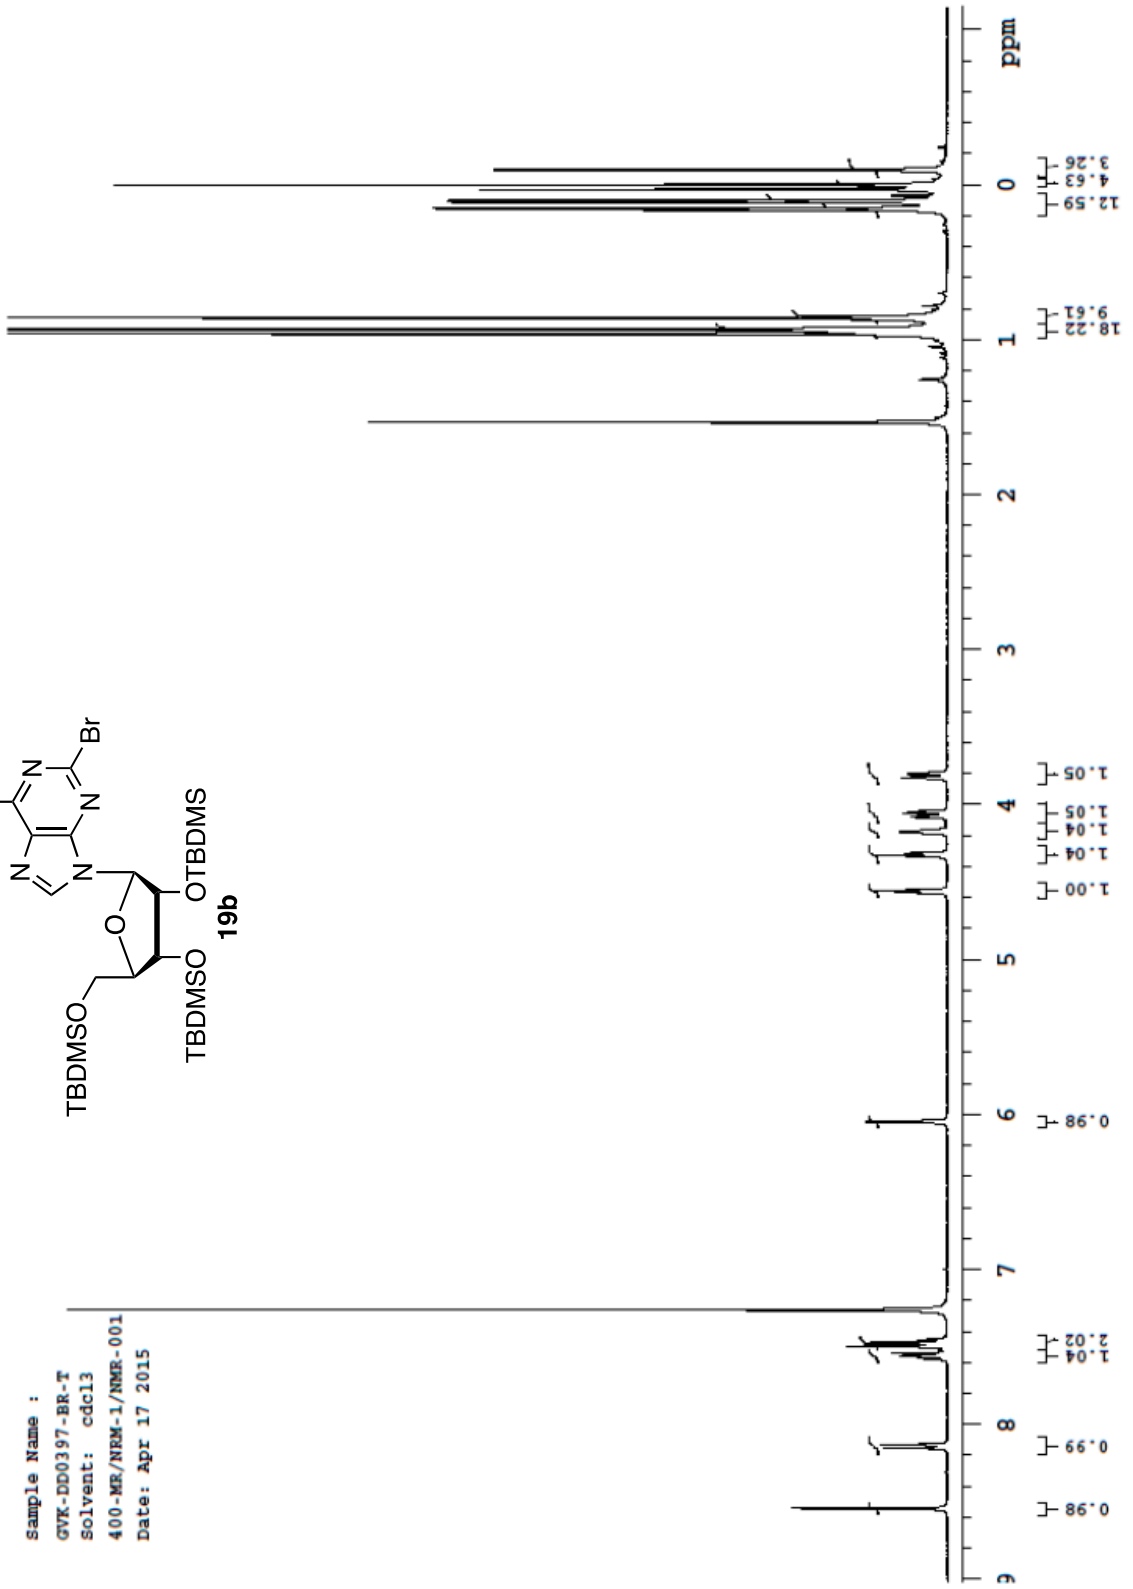

Sample Name :  
GVK-DD0397-BR-OBT-OTB

Solvent: cdcl3  
Date: Apr 22 2015  
400 VNMRS/NRM-1/NMR-002

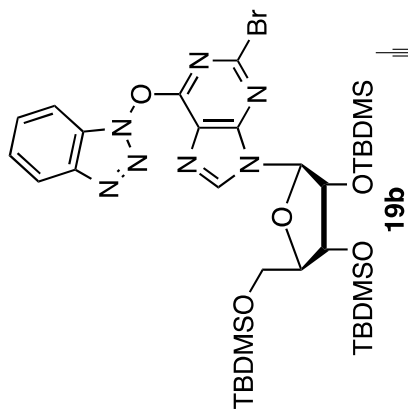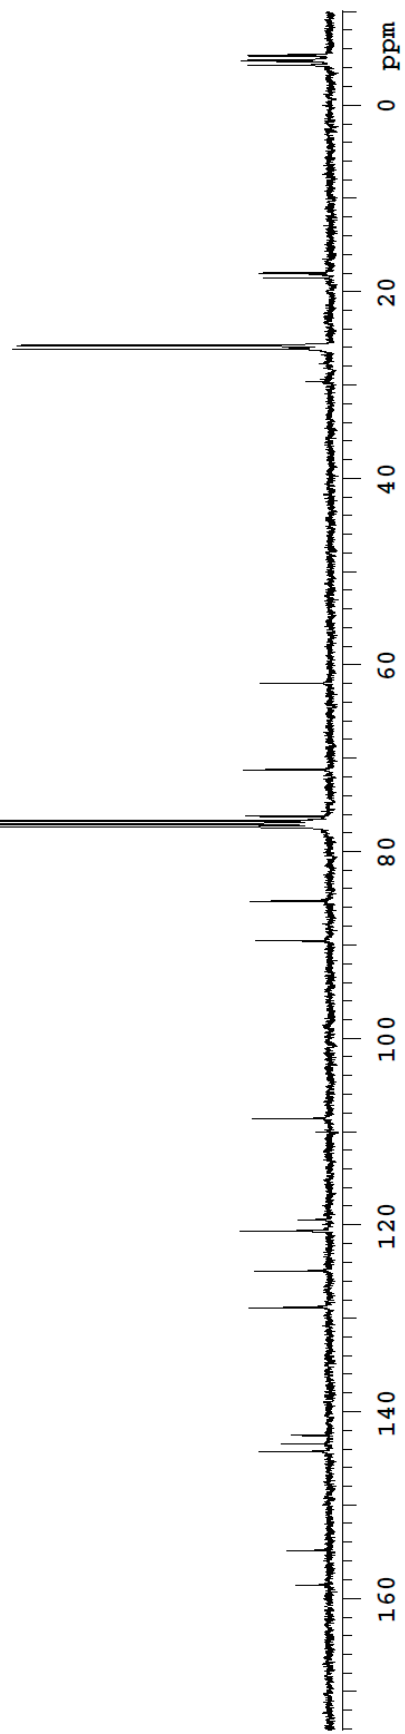

Plotname: 021504C5846\_CARBON\_01\_plot05

Sample Name :  
GVK-DD0397-BR-NH2-TBS

Solvent: cdcl3  
Date: Apr 22 2015  
400 VNMR5/NRM-1/NMR-002

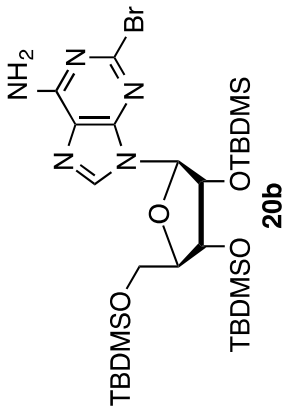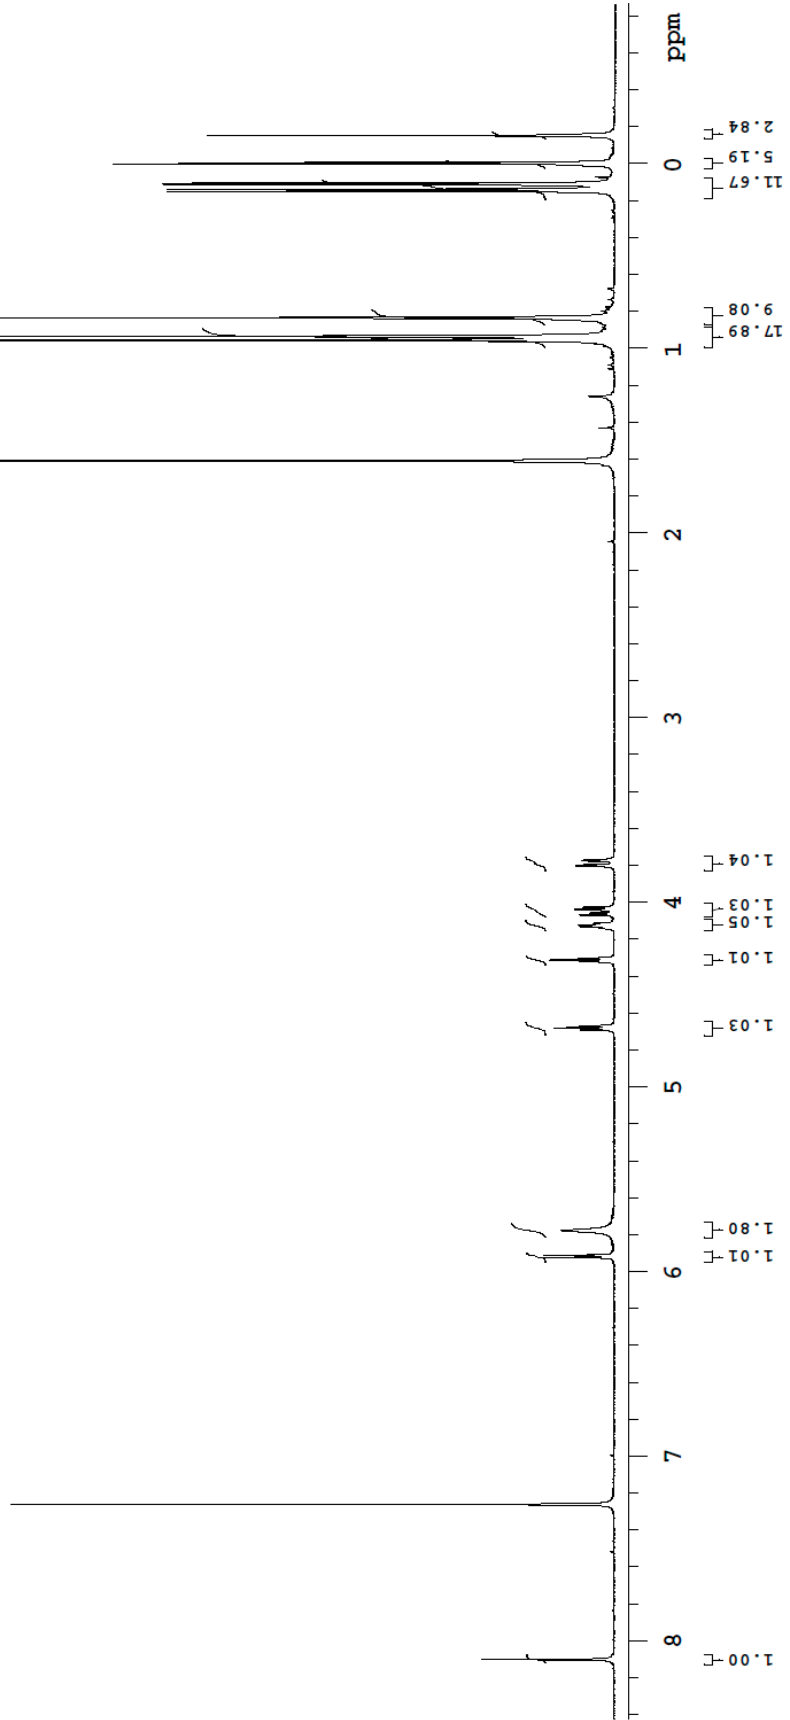

Plotname: 021504C5838\_PROTON\_01\_plot07

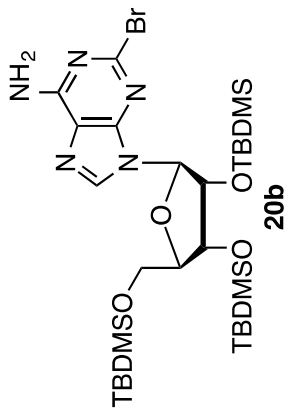

Sample Name :  
GYK-DD0397-BR-NH2-OTB  
Solvent: cdcl3  
VMES-400/NMR-1/NMR-002  
Date: Apr 22 2015

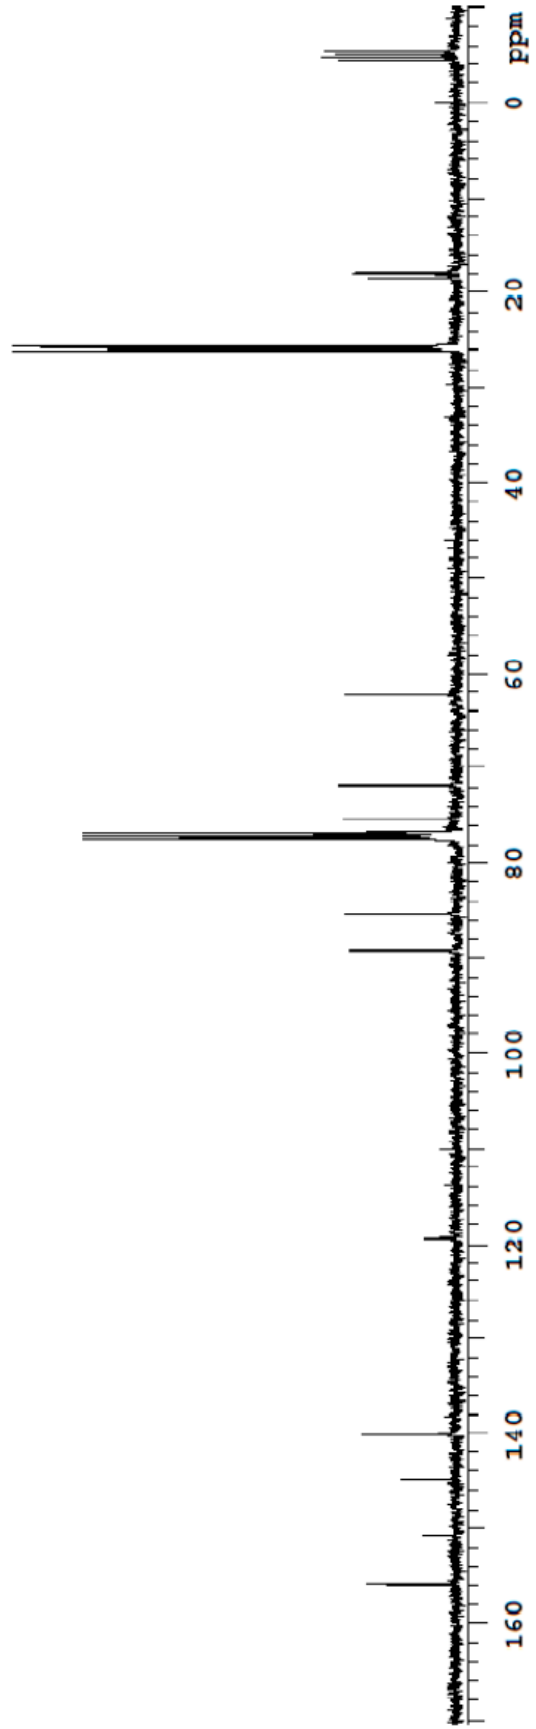



Sample Name :  
GVK-DO0397-RR-RB2-OH

Solvent: cd3od  
Date: Apr 20 2015  
400 VNMRS/HEM-1/HRM-002

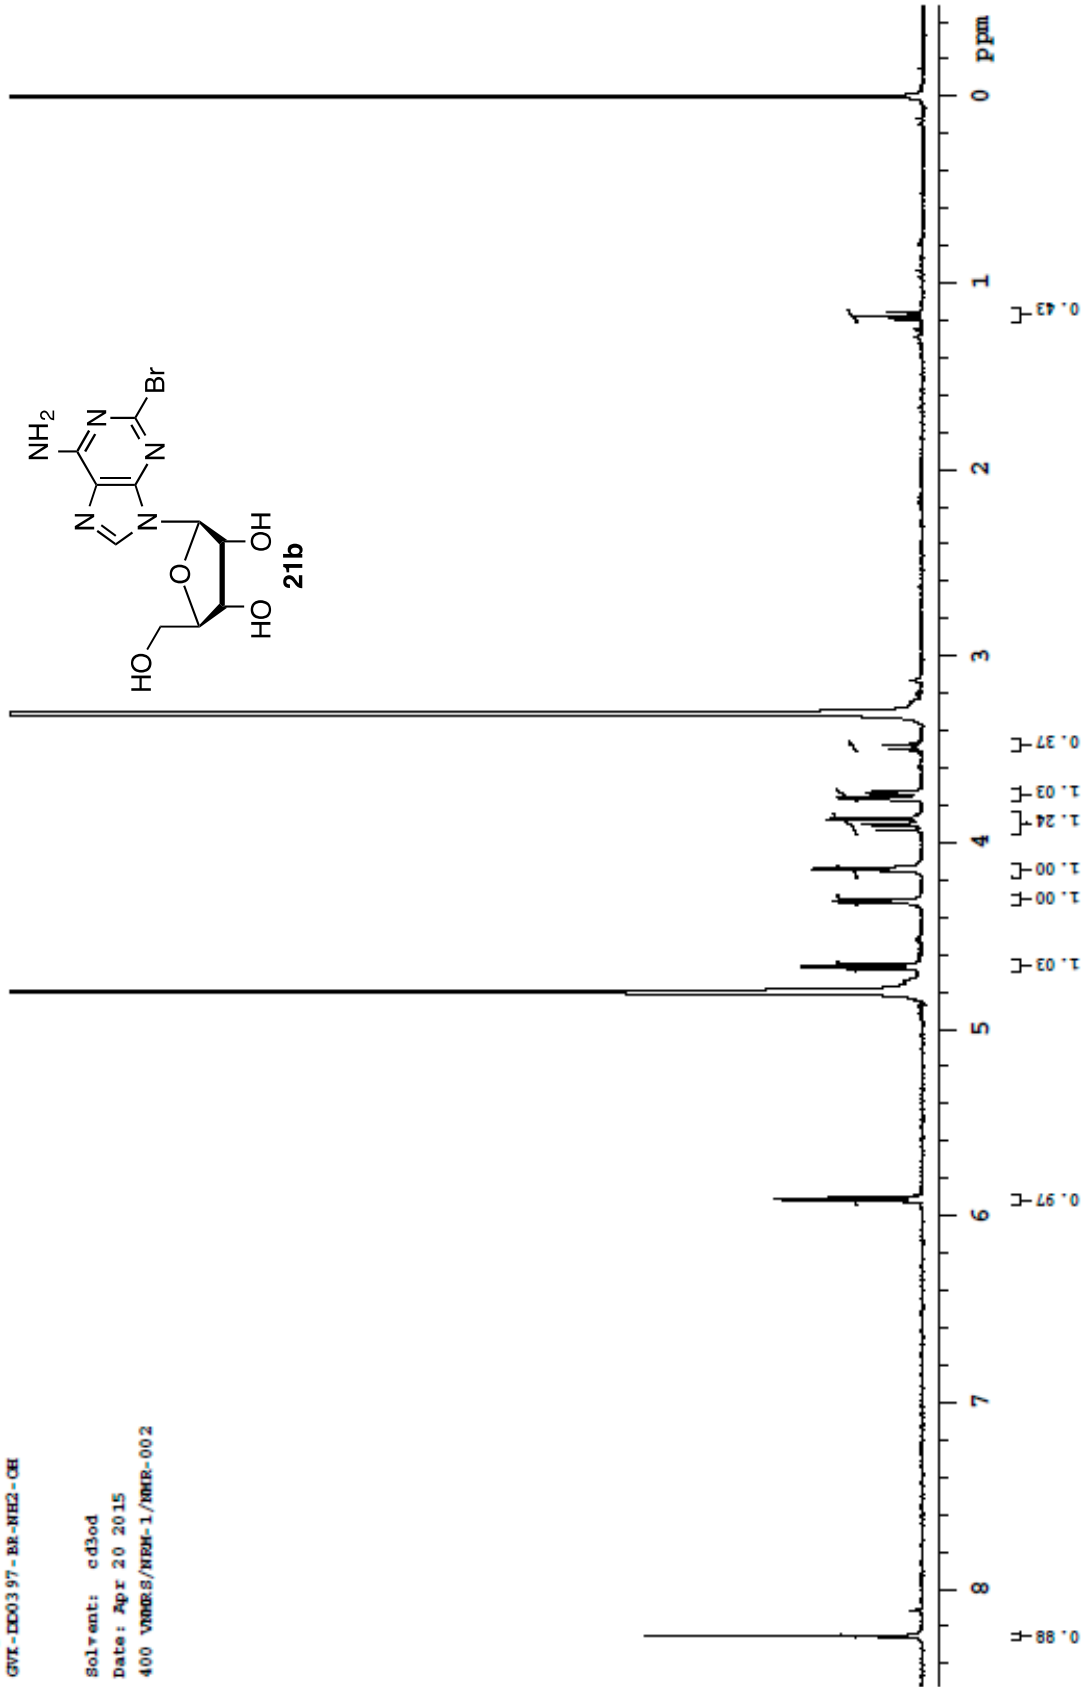

Plotname: 021504C3615\_PROTON\_01\_plot10

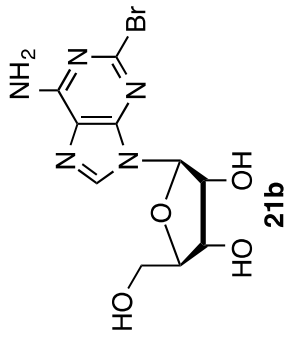

Sample Name :

GVK-DD0397-BR-NH2-OH

Solvent: dmsc

VNMR5-400/NRM-1/NMR-002

Date: Apr 22 2015

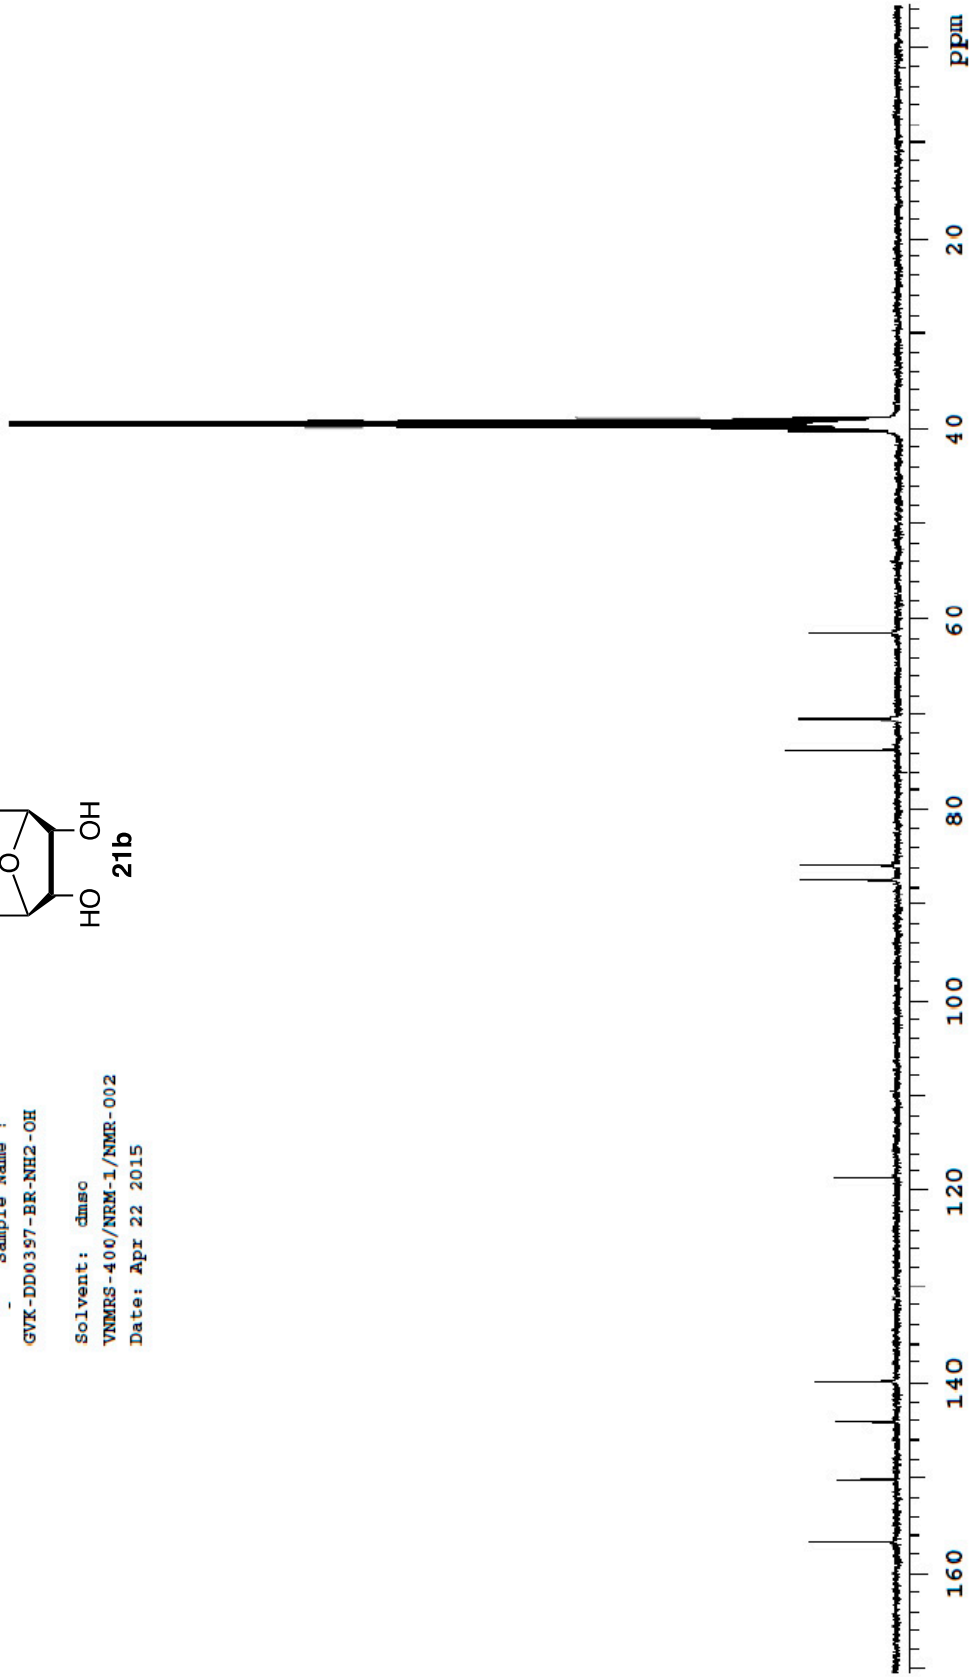

Supplement: molecules-20-18437-s001.pdf [file molecules-20-18437-s001.pdf]
